# Supplementary material for: Acupuncture for insomnia with short sleep duration: protocol for a randomised controlled trial
Source: PubMed Central journal article supplement — BMJ Open. 2020 Mar 4;10(3):e033731. doi: 10.1136/bmjopen-2019-033731 (PMC7059535; doi:10.1136/bmjopen-2019-033731), 2020-03-04
Supplement: bmjopen-2019-033731.draft_revisions.pdf [file bmjopen-2019-033731.draft_revisions.pdf]

# BMJ Open

BMJ Open is committed to open peer review. As part of this commitment we make the peer review history of every article we publish publicly available.

When an article is published we post the peer reviewers' comments and the authors' responses online. We also post the versions of the paper that were used during peer review. These are the versions that the peer review comments apply to.

The versions of the paper that follow are the versions that were submitted during the peer review process. They are not the versions of record or the final published versions. They should not be cited or distributed as the published version of this manuscript.

BMJ Open is an open access journal and the full, final, typeset and author-corrected version of record of the manuscript is available on our site with no access controls, subscription charges or pay-per-view fees (<http://bmjopen.bmj.com>).

If you have any questions on BMJ Open's open peer review process please email [info.bmjopen@bmj.com](mailto:info.bmjopen@bmj.com)

# BMJ Open

## Acupuncture for Insomnia with Short Sleep Duration: Protocol for a Randomized Controlled Trial

|                               |                                                                                                                                                                                                                                                                      |
|-------------------------------|----------------------------------------------------------------------------------------------------------------------------------------------------------------------------------------------------------------------------------------------------------------------|
| Journal:                      | <i>BMJ Open</i>                                                                                                                                                                                                                                                      |
| Manuscript ID                 | bmjopen-2019-033731                                                                                                                                                                                                                                                  |
| Article Type:                 | Protocol                                                                                                                                                                                                                                                             |
| Date Submitted by the Author: | 19-Aug-2019                                                                                                                                                                                                                                                          |
| Complete List of Authors:     | Wang, Cong; 1. Yueyang Hospital of Integrated Traditional Chinese and Western Medicine, Shanghai University of Traditional Chinese Medicine, Yang, Wen-jia<br>Yu, Xin-tong<br>Fu, Cong<br>Li, Jin-jin<br>Wang, Jing<br>Xu, Wen-lin<br>Zheng, Yi-xin<br>Chen, Yun-fei |
| Keywords:                     | Acupuncture, Insomnia, Short Sleep Duration, Randomized controlled trial, Protocol                                                                                                                                                                                   |
|                               |                                                                                                                                                                                                                                                                      |

SCHOLARONE™  
Manuscripts

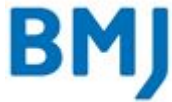

I, the Submitting Author has the right to grant and does grant on behalf of all authors of the Work (as defined in the below author licence), an exclusive licence and/or a non-exclusive licence for contributions from authors who are: i) UK Crown employees; ii) where BMJ has agreed a CC-BY licence shall apply, and/or iii) in accordance with the terms applicable for US Federal Government officers or employees acting as part of their official duties; on a worldwide, perpetual, irrevocable, royalty-free basis to BMJ Publishing Group Ltd ("BMJ") its licensees and where the relevant Journal is co-owned by BMJ to the co-owners of the Journal, to publish the Work in this journal and any other BMJ products and to exploit all rights, as set out in our [licence](#).

The Submitting Author accepts and understands that any supply made under these terms is made by BMJ to the Submitting Author unless you are acting as an employee on behalf of your employer or a postgraduate student of an affiliated institution which is paying any applicable article publishing charge ("APC") for Open Access articles. Where the Submitting Author wishes to make the Work available on an Open Access basis (and intends to pay the relevant APC), the terms of reuse of such Open Access shall be governed by a Creative Commons licence – details of these licences and which [Creative Commons](#) licence will apply to this Work are set out in our licence referred to above.

Other than as permitted in any relevant BMJ Author's Self Archiving Policies, I confirm this Work has not been accepted for publication elsewhere, is not being considered for publication elsewhere and does not duplicate material already published. I confirm all authors consent to publication of this Work and authorise the granting of this licence.

# Acupuncture for Insomnia with Short Sleep Duration: Protocol for a Randomized Controlled Trial

Cong Wang<sup>1</sup>; Wen-jia Yang<sup>1</sup>; Xin-tong Yu<sup>1</sup>; Cong Fu<sup>1</sup>; Jin-jin Li<sup>1</sup>; Jing Wang<sup>1</sup>;  
Wen-lin Xu<sup>1</sup>; Yi-xin Zheng<sup>1</sup>; Yun-fei Chen<sup>1\*</sup>

1. Yueyang Hospital of Integrated Traditional Chinese and Western Medicine, Shanghai University of Traditional Chinese Medicine, Shanghai, China;

Address correspondence to: Yun-fei Chen, Yueyang Hospital of Integrated Traditional Chinese and Western Medicine, Shanghai University of Traditional Chinese Medicine, No.110 Ganhe Road, Hongkou District, Shanghai 200437, China. Telephone: 86-021-65162628. Fax: 86-021-65162628; Email: icyf1968@163.com

## Abstract

**Introduction:** Insomnia with short sleep duration has a more serious negative impact on patient health. The existing literature suggests that medication therapy is more effective for this phenotype of insomnia compared to cognitive behavioural therapy (CBT). However, the potential side effects of hypnotic medications hinder their clinical application. Acupuncture has been widely used in the treatment of insomnia, but it remains unclear whether it has therapeutic efficacy for insomnia with short sleep duration. The purpose of this trial is to evaluate the efficacy and safety of acupuncture for insomnia with short sleep duration.

**Methods and analysis:** This study is designed as a randomized, single centre, single-blinded, placebo acupuncture controlled trial involving 152 participants. Eligible patients will be divided into two groups according to the objective total sleep time: insomnia with normal sleep duration group and insomnia with short sleep duration group. Then, patients in each group will be randomly assigned to two subgroups, the treatment group (acupuncture) and the control group (placebo acupuncture), in a 1:1 ratio with 38 subjects in each subgroup. The primary outcome is the Pittsburgh Sleep Quality Index (PSQI) and the Insomnia Severity Index (ISI). Secondary outcomes are

actigraphy (ACT), the Beck Anxiety Inventory (BAI), the Beck Depression Inventory (BDI) and the Fatigue Severity Scale (FSS). All adverse effects will be assessed by the Treatment Emergent Symptom Scale. Outcomes will be evaluated at baseline, post-treatment, as well as at 1-week and 1-month follow-up.

**Ethics and dissemination:** This protocol has been approved by the ethics committee of Yueyang Hospital of Integrated Traditional Chinese and Western Medicine (No.: 2019-17). Written informed consent will be obtained from all participants. The results will be disseminated through peer-reviewed journals for publications.

**Registration:** ChiCTR1900023473; Pre-results.

**Keywords** Acupuncture; Insomnia; Short Sleep Duration; Randomized controlled trial; Protocol.

## Article Summary

### Strengths and limitations of this study

1. This is the first randomized, single centre, placebo acupuncture controlled trial to study the efficacy and safety of acupuncture for insomnia with short sleep duration.
2. Through a 2×2 factorial design, this trial will study whether the efficacy of acupuncture on chronic insomnia is related to insomnia phenotypes or acupoint effects and will evaluate both subjective and objective parameters.
3. The results of this study will provide knowledge relevant for clinical practice and fill gaps in current guidelines concerning acupuncture for insomnia with short sleep duration.
4. One limitation is that this study is implemented in only one center in Chinese subjects and without long-term treatment and follow-up, which may limit its generalisability.

## 1. Introduction

In recent years, the incidence of chronic insomnia in adults has become higher <sup>[1]</sup>, and short sleepers are also showing an increasing trend <sup>[2]</sup>. Studies have found that patients with insomnia accompanied by short sleep duration can cause many chronic diseases, such as obesity, diabetes, cardiovascular disease, chronic kidney disease, and hypertension <sup>[3-7]</sup>, and may even result in inadequate hydration <sup>[8]</sup>. Similarly, insomnia patients who are accompanied by short sleep duration will have many adverse effects on their health. Some researchers have found that the mortality rate of insomnia patients is three times more than that of people without insomnia. When patients with insomnia have short sleep duration, the damage to their health will be more serious and the mortality rate will be higher <sup>[9]</sup>.

Based on this, Vgontzas <sup>[10]</sup> proposed that insomnia can be divided into two phenotypes based on objective sleep duration, with the threshold of the total sleep time being 6 h. The first phenotype (short objective sleep duration) is characterized by physiological hyperarousal with numerous medical complications. The second phenotype (normal sleep duration) is characterized by cognitive-emotional disorders, accompanied by a process of cortical excitement and remitting course. Vgontzas also suggested that insomnia with short sleep duration may be less sensitive to CBT-I therapy. Although many guidelines of sleep disorders recommend CBT-I as the primary treatment <sup>[11-13]</sup>, Christina J and her team conducted a trial and concluded that insomnia with short sleep duration has a dull response to CBT-I therapy <sup>[14]</sup>.

Because CBT-I lacks specificity for the treatment of insomnia with objective short sleep duration, these patients can only resort to sleep medicine. However, there are many side effects to benzodiazepine receptor agonists, such as hangover effects, cognitive impairment, and drug addiction <sup>[15-16]</sup>. Therefore, many people with insomnia seek complementary and alternative medicine, such as acupuncture. Acupuncture has been widely used in the treatment of insomnia, and studies have shown that it can improve sleep efficiency, daytime functioning, psychological health and sleep quality of insomnia subjects <sup>[17-18]</sup>. Our previous research also showed that acupuncture has a

1  
2  
3  
4 good short-term effect on perimenopausal insomnia <sup>[19]</sup>. An earlier Cochrane review  
5 showed that acupuncture can improve the sleep quality of insomnia subjects compared  
6 with untreated groups and placebo acupuncture groups <sup>[20]</sup>.  
7  
8

9 This is the first rigorous randomized controlled clinical trial to study the therapeutic  
10 effect of acupuncture on insomnia with short sleep duration and compare the effects on  
11 different insomnia phenotypes. Our objectives are as follows: (1) In randomized  
12 controlled trials with a 2×2 factorial design, we will study whether the clinical effect of  
13 acupuncture on chronic insomnia is related to insomnia phenotypes or acupoint effects  
14 and will evaluate both subjective and objective parameters. (2) We will explore the  
15 clinical symptomatic manifestations (difficulty in falling asleep, early awakening,  
16 difficulty in maintaining sleep, etc.) and psychological characteristics (anxiety,  
17 depression, sensitivity, etc.) and analyse the acupuncture effect for these symptoms of  
18 insomnia with short sleep duration.  
19  
20  
21  
22  
23  
24  
25  
26  
27  
28  
29  
30  
31

## 32 **2. Methods**

### 33 **2.1. Study design**

34 This study is a randomized controlled trial with a single-centre, single-blind, 2×2  
35 factorial design and will be completed in Yueyang Hospital of Integrated Traditional  
36 Chinese and Western Medicine affiliated with Shanghai University of Traditional  
37 Chinese Medicine. The study period will be from November 2019 to April 2021, and  
38 the Shanghai Municipal Commission of Health and Family Planning will be the  
39 management organization of the study.  
40  
41  
42  
43  
44  
45  
46  
47

48 Insomnia subjects who meet the inclusion criteria will be divided into two groups  
49 according to the objective total sleep time (TST): insomnia with a short sleep duration  
50 group (objective sleep time < 6 h) and insomnia with a normal sleep duration group  
51 (objective sleep time ≥ 6 h). A total of 76 subjects will be recruited from each group.  
52 Each group will be randomly assigned to the acupuncture subgroup and the placebo  
53 acupuncture subgroup at a 1:1 ratio. Each subject will experience screening, treatment  
54 and a follow-up period of approximately 8 weeks. All subjects will complete the  
55  
56  
57  
58  
59  
60

1  
2  
3  
4 following scales <sup>[21]</sup>: The Pittsburgh Sleep Quality Index (PSQI) <sup>[22]</sup> and the Insomnia  
5 Severity Index (ISI) <sup>[23-24]</sup> will evaluate subjects' subjective sleep improvement.  
6  
7 Subjects will be assessed for the objective total sleep time by actigraphy <sup>[25]</sup> in  
8  
9 conjunction with a sleep diary <sup>[26]</sup>. Subjects' mood improvement will be evaluated by  
10  
11 the Beck Anxiety Inventory (BAI) <sup>[27]</sup> and the Beck Depression Inventory (BDI) <sup>[28]</sup>.  
12  
13 The Fatigue Severity Scale (FSS) <sup>[29]</sup> will be used to assess the improvement in fatigue.  
14  
15 The above scales or actigraphy will be evaluated during the screening period and after  
16  
17 the treatment at one-week and one-month follow-ups (Figure 1). Subjects will sign the  
18  
19 informed consent form after enrolment.  
20  
21  
22  
23  
24  
25  
26  
27  
28  
29  
30  
31  
32  
33  
34  
35  
36  
37  
38  
39  
40  
41  
42  
43  
44  
45  
46  
47  
48  
49  
50  
51  
52  
53  
54  
55  
56  
57  
58  
59  
60



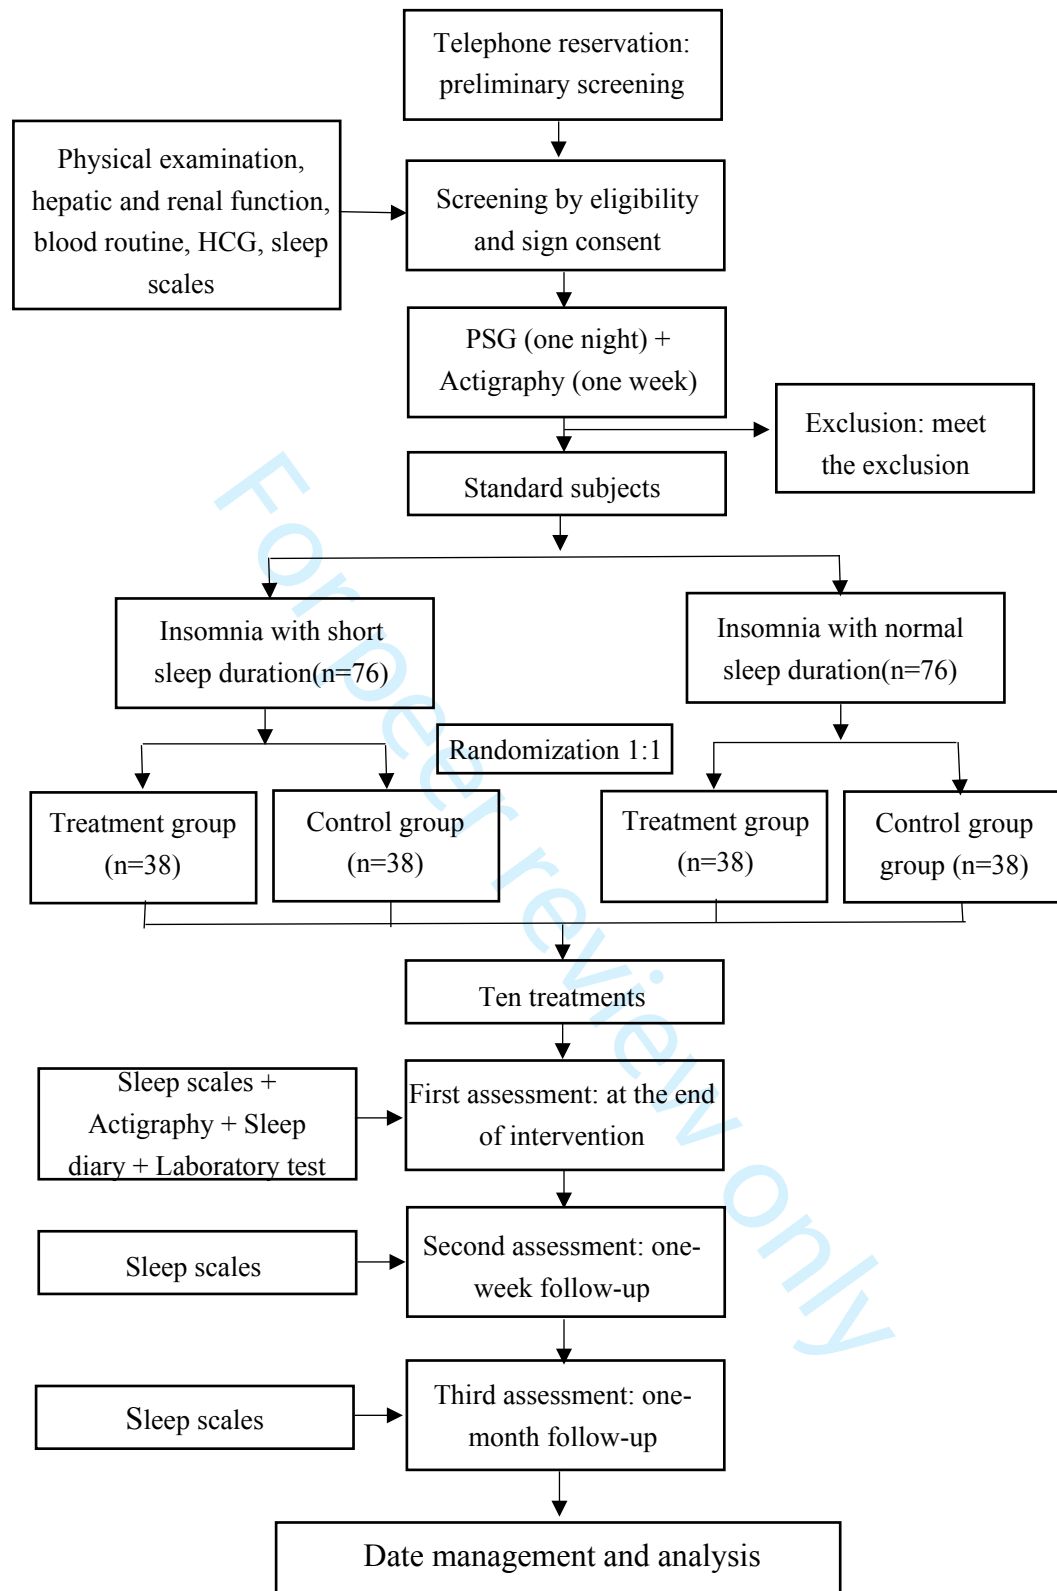

Fig.1. Trial flow chart

## 2.2. Participants

The study will include 152 insomnia participants. We plan to recruit participants in multiple ways, and the recruitment location will be restricted to Yueyang Hospital of Integrated Traditional Chinese and Western Medicine affiliated with Shanghai University of Traditional Chinese Medicine, Shanghai, China. Our hospital is a comprehensive tertiary hospital with clinical treatment, scientific research and teaching practice. The main source of the subjects will be the outpatients who meet our criteria. In addition, we will also recruit participants through newspapers, social media and advertising. The time limit will be from November 2019 to April 2021. The site of our clinical trial will be the Insomnia Diagnosis and Treatment Center of the Acupuncture and Moxibustion Department at Yueyang Hospital of Integrated Traditional Chinese and Western Medicine affiliated with Shanghai University of Traditional Chinese Medicine. All participants who are willing to participate in the trial will be required to call our research coordinator and arrange an outpatient interview on the first available date.

### 2.2.1. Inclusion criteria

The outpatient interview will be conducted in the form of a semi-structured interview questionnaire, which will contain the cause of insomnia, onset process, treatment process, main sleep complaints, bedtime status, sleep-wake cycle, other sleep-related symptoms, daytime symptoms, mental state, etc. [30]. The inclusion criteria have been developed based on the diagnostic criteria for chronic insomnia in the International Classification of Sleep Disorders (Third Edition) (ICSD-3) [31] developed by the American Academy of Sleep Medicine in 2014. The inclusion criteria are as follows:

- (1) Between 18 and 65 years of age;
- (2) Compliance with the diagnostic criteria for chronic insomnia in ICSD-3;
- (3) Stable administration of sedative-hypnotic drugs for more than 3 months before entering the study or not taking such drugs;
- (4) PSQI [22] > 5 points, ISI [23-24] > 14 points, BAI [27] < 45 points and BDI [28] ≤ 28 points;
- (5) Never received acupuncture treatment;

1  
2  
3  
4 (6) Voluntarily participated in the study and signed informed consent.

5 In addition, all participants will complete a one-week sleep actigraphy and diary to  
6 determine their sleep patterns and objective sleep duration before enrolment [32]. We  
7 will recruit 76 subjects in each group (insomnia with short sleep duration and insomnia  
8 with normal sleep duration). If one group completes recruitment first, that specific  
9 group will stop recruiting.  
10  
11  
12  
13  
14

### 15 **2.2.2. Exclusion criteria**

16 The exclusion criteria are as follows:

- 17 (1) Severe hepatic and renal function damage, as well as haematologic diseases and  
18 respiratory diseases and diagnosis of mental disorders according to the Diagnostic  
19 and Statistical Manual of Mental Disorders (DSM-V) [33];
  - 20 (2) Semi-structured clinical interviews determine subjects have other sleep disorders  
21 rather than primary insomnia;
  - 22 (3) Infectious diseases such as infectious hepatitis, tuberculosis, AIDS, and syphilis;
  - 23 (4) Severe digestive system diseases and severe malnutrition;
  - 24 (5) Pregnant or lactating;
  - 25 (6) Severe trauma with no cure or not suitable for acupuncture, such as allergic  
26 constitution and severe dermatosis;
  - 27 (7) An apnoea–hypopnea index (AHI) >10 or periodic limb movements index during  
28 sleep associated with >15 arousals per hour on diagnostic PSG [34];
  - 29 (8) Participated in other clinical trials in the last 3 months.
- 30  
31  
32  
33  
34  
35  
36  
37  
38  
39  
40  
41  
42  
43  
44  
45  
46

### 47 **2.3. Interventions**

48 The acupuncturist for this study has received a master's degree in acupuncture and  
49 tuina at Shanghai University of Traditional Chinese Medicine, has 8 years of training  
50 experience, has obtained a doctor qualification certificate, and has 3 years of clinical  
51 work experience. All study participants will receive 10 days of training prior to the start  
52 of the trial to become more familiar with the process.  
53  
54  
55  
56  
57

58 The subjects in the acupuncture group will be placed in the supine position. We have  
59 selected 5 acupoints for this study: GV20 (Baihui), PC 6 (Neiguan), SP 6 (Sanyinjiao),  
60

1  
2  
3  
4 HT 7 (Shenmen) and Ex-HN 1 (Sishencong). The reason for choosing these acupoints  
5 is the previous systematic review [35-36] and our clinical experience. A disposable sterile  
6 stainless steel acupuncture needle with a length of 40 mm and a diameter of 0.25 mm  
7 will be used (Andy, Guizhou, China). The acupuncturist will take the points on both  
8 sides of the body. The needle will be inserted into the skin to a depth of 10-20 mm,  
9 which is determined by the acupuncturist according to body type (high or short, fat or  
10 thin). After piercing, a thrusting and twirling of the needle will be performed to induce  
11 the sensation of “De qi”, and the needle will be left for 20 minutes [37]. “De qi” means  
12 that after the needle has penetrated into the acupoint to a certain depth, the needle is  
13 thrust and twirled to cause the acupoint to obtain the induction of meridian qi. The  
14 subjects will have a self-conscious reaction such as soreness, heaviness or distention.  
15 This is the key process in acupuncture treatment [38].

16  
17  
18  
19  
20  
21  
22  
23  
24  
25  
26  
27  
28  
29  
30  
31  
32  
33  
34  
35  
36  
37  
38  
39  
40  
41  
42  
43  
44  
45  
46  
47  
48  
49  
50  
51  
52  
53  
54  
55  
56  
57  
58  
59  
60  
Subjects who entered the control group will receive a placebo acupuncture treatment  
by using a non-invasive placebo needle [39] with the same acupoints as the treatment  
group. This placebo needle has been widely used in clinical research on placebo  
acupuncture treatment of insomnia [19,40-41], and studies have shown that using this  
needle in a placebo acupuncture group is reliable for the Chinese population [42].  
Subjects from both the treatment group and the control group will be treated equally by  
the physician to prevent them from perceiving the difference.

## 2.4. Outcome measures

### 2.4.1. Primary outcome measures

The primary outcome of this study will be changes in the PSQI and ISI between the  
baseline, post-treatment assessment, one-week follow-up and one-month follow-up  
(Table 1).

The PSQI consists of 19 self-evaluation items and 5 other evaluation items. The self-  
assessment items assess sleep quality, fall asleep time, total sleep time, sleep efficiency,  
concomitant symptoms, hypnotic drugs, and daytime functions. The total score is 0-21  
points. Higher scores indicate worse sleep quality and more severe sleep disorders [22].  
The PSQI is widely used in the clinic to assess sleep dysfunction [43], and it is more

likely to assess an individual's sleep state on weekdays [44]. A total score > 5 indicates a need for clinical treatment [45]. The Chinese version of the PSQI has a high degree of reliability and validity for the Chinese population and can be used as an effective tool for sleep screening and evaluation in clinical and scientific research [46-47].

The ISI mainly evaluates the insomnia nature, insomnia severity, and effects of daytime function on patients. The scale is simple and easy to implement. It consists of 7 evaluation items with a total score of 0-28. The higher the score, the more serious the degree of insomnia [24]. It is mainly used for the screening of patients with insomnia and the evaluation of a therapeutic effect in clinical studies [48]. A total score of 8-14 indicates subclinical insomnia, and a total score > 14 indicates clinical insomnia. A change score of -8.4 points is associated with moderate improvement as rated by an independent assessor after treatment in the clinical sample [24, 49]. The Chinese version of the ISI is used in China's population assessment for insomnia with high reliability and validity [50].

#### 2.4.2. Secondary outcome measures

The secondary outcome measures consist of (1) changes in the number of awakenings (NOA), total wake time (TWT), total sleep time (TST), and sleep efficiency (SE) measured by actigraphy before and after treatment; (2) changes in BAI, BDI, and FSS scores after treatment and during follow-up compared with before treatment; (3) changes in sleep onset latency (SOL), total wake time (TWT), total sleep time (TST), sleep efficiency (SE), and middle of the night wake after sleep onset (MWASO) from the sleep diary after treatment compared with those before treatment (Table 1).

ACT evaluates the body state by measuring the body movement by wearing a motion sensor on the non-dominant wrist. It can be used as one of the objective indicators for evaluating sleep-wake state [25]. It can satisfactorily evaluate the four sleep indicators: number of awakenings, wake time after sleep onset, total sleep time, and sleep efficiency percentage [51]. Early studies have shown that ACT has a good fit to polysomnography (PSG) in assessing sleep and wakefulness ( $R_s = 0.52-0.71$ ) and has a good sensitivity as an index of effect evaluation in insomnia treatment [52-53]. The motion watch 8 wrist ACT produced by CamNtech Ltd. will be used in this study. Its

1  
2  
3  
4 acceleration sensitivity is  $<0.01$  g, with 5 s as the analysis unit. The recorded sleep and  
5  
6 activity data will be analysed by the corresponding MotionWare Software. The main  
7  
8 parameters include sleep-wake parameters and rest-activity parameters. In this study,  
9  
10 we will use ACT combined with a sleep diary <sup>[26]</sup> to record the sleep of the subjects for  
11  
12 one continuous week.

13  
14 The BAI, which was developed by Beck in 1988 <sup>[54]</sup>, contains a total of 21 different  
15  
16 anxiety symptom items. It is used to evaluate the anxiety state of a subject in the past  
17  
18 week. The higher the score, the more serious the degree of anxiety. Generally, BAI  $\geq$   
19  
20 45 is used as the criterion for positive anxiety. This study will exclude subjects with  
21  
22 non-primary insomnia. The scale is simple in content, easy in operation, and clear in  
23  
24 understanding. The Chinese version has good reliability and validity. It is a commonly  
25  
26 used measurement tool for anxiety symptom assessment in the Chinese population <sup>[55]</sup>.

27  
28 The BDI is based on the diagnostic criteria for depression in the fourth edition of the  
29  
30 Diagnostic and Statistical Manual of Mental Disorders. The first version was published  
31  
32 in 1961 and revised to the current version by Beck et al. The scale has a total of 21  
33  
34 items that are used to evaluate the severity of a subject's depression over the past week.  
35  
36 The higher the total score is, the more severe the depression. A total score of 0-13 is  
37  
38 known as no depression, 14-19 as mild depression, 20-28 as moderate depression and  
39  
40 29-63 as major depression. The Chinese version has been tested and proven to have  
41  
42 good reliability and validity <sup>[56]</sup>.

43  
44 The FSS <sup>[29]</sup> was formulated by Krupp in 1989. The scale has a total of 9 items and  
45  
46 is simple and easy to perform. A higher score indicates more severe fatigue. In insomnia  
47  
48 patients, the FSS threshold is 5.5 points, and a high score represents the impaired  
49  
50 daytime functional status of insomnia patients <sup>[57]</sup>. The Chinese version of this scale has  
51  
52 been determined to have good reliability and validity <sup>[58]</sup>.

### 53 **2.4.3. Safety assessments**

54  
55 Safety will be assessed by routine blood test, renal function test and liver function  
56  
57 test. These indicators are detected during the period of screening and after the treatment.  
58  
59 We will still count the events during the trial through a list of adverse events. We will  
60  
specifically evaluate them during the assessment phase <sup>[59]</sup> (Table 1). Adverse events

1  
2  
3  
4 will be defined as any adverse medical reactions that occurred from the time the subject  
5 signed the informed consent form to the time of the last follow-up, whether or not there  
6 is a causal relationship with the study treatment. Subjects are required to fill in the list  
7 of adverse events, which should record the time point, severity, measures taken,  
8 whether they are related to the treatment and prognosis. During the assessment phase,  
9 researchers will assess the possible relationship between adverse events and the study,  
10 as well as the combined medications. Adverse events include all adverse reactions that  
11 are definitely related to treatment, most likely related to treatment and likely related to  
12 treatment.  
13  
14  
15  
16  
17  
18  
19  
20  
21  
22  
23  
24  
25  
26  
27  
28  
29  
30  
31  
32  
33  
34  
35  
36  
37  
38  
39  
40  
41  
42  
43  
44  
45  
46  
47  
48  
49  
50  
51  
52  
53  
54  
55  
56  
57  
58  
59  
60

| Week                                      | 0        | 1               | 2 | 3 | 4               | 8 |
|-------------------------------------------|----------|-----------------|---|---|-----------------|---|
|                                           | Baseline | Treatment phase |   |   | Follow-up phase |   |
| <b>PATIENTS</b>                           |          |                 |   |   |                 |   |
| Telephone reservation                     | ×        |                 |   |   |                 |   |
| Enrolment                                 | ×        |                 |   |   |                 |   |
| Sign informed consent                     | ×        |                 |   |   |                 |   |
| Clinical interview                        | ×        |                 |   |   |                 |   |
| Sleep scales                              | ×        |                 |   |   |                 |   |
| Physical examination                      | ×        |                 |   |   | ×               |   |
| Laboratory test                           | ×        |                 |   |   | ×               |   |
| PSG                                       | ×        |                 |   |   |                 |   |
| <b>GROUPS</b>                             |          |                 |   |   |                 |   |
| Acupuncture group (normal sleep duration) |          |                 |   |   | Ten treatments  |   |
| Control group (normal sleep duration)     |          |                 |   |   | Ten treatments  |   |
| Acupuncture group (short sleep duration)  |          |                 |   |   | Ten treatments  |   |
| Control group (short sleep duration)      |          |                 |   |   | Ten treatments  |   |
| <b>OUTCOME MEASUREMENT</b>                |          |                 |   |   |                 |   |
| PSQI                                      | ×        |                 |   |   | ×               | × |
| ISI                                       | ×        |                 |   |   | ×               | × |
| ACT                                       | ×        |                 |   |   | ×               |   |
| BAI                                       | ×        |                 |   |   | ×               |   |
| BDI                                       | ×        |                 |   |   | ×               |   |
| FSS                                       | ×        |                 |   |   | ×               |   |
| Sleep diary                               | ×        | ×               | × | × | ×               |   |
| Adverse events                            |          |                 |   |   |                 |   |
| Reasons for dropouts or withdrawals       |          | ×               | × | × | ×               | × |
| Patient's compliance                      |          |                 |   |   | ×               | × |

Note:

ACT: Actigraphy

BAI: Beck Anxiety Inventory

BDI: Beck Depression Inventory

FSS: Fatigue Severity Scale

ISI: Insomnia Severity Index

PSG: Polysomnography

PSQI: Pittsburgh Sleep Quality Index



1  
2  
3  
4  
5  
6  
7  
8  
9  
10  
11  
12  
13  
14  
15  
16  
17  
18  
19  
20  
21  
22  
23  
24  
25  
26  
27  
28  
29  
30  
31  
32  
33  
34  
35  
36  
37  
38  
39  
40  
41  
42  
43  
44  
45  
46  
47  
48  
49  
50  
51  
52  
53  
54  
55  
56  
57  
58  
59  
60

Table 1. Trial processes chart

For peer review only

## 2.5. Sample size

According to previous literature [19], placebo acupuncture reduced the PSQI of chronic insomnia to 14.76 after treatment, and the standard deviation was 3.35. We hypothesize that the true acupuncture in our study could reduce the PSQI score by 2.2 points compared with the placebo acupuncture, and the standard deviation of 2.93 was taken from the previous research results. According to the needs of this study, we made  $\alpha=0.05$  and  $1-\beta=0.90$ , according to the formula [60]:

$$n = \psi^2 (\sum S_i^2 / g) / [\sum (\bar{X}_i - \bar{X})^2 / (g - 1)]$$

$\bar{X}_1=12.56$ ,  $S_1=2.93$ ,  $\bar{X}_2=14.76$ ,  $S_2=3.35$ ,  $\bar{X}_3=12.56$ ,  $S_3=2.93$ ,  $\bar{X}_4=14.76$ ,  $S_4=3.35$ , and  $\bar{X}=13.66$ ; by looking up the table,  $\psi=2.17$ . Calculating the sample size of each group:  $n=30.92\approx 31$ ; considering the loss factor (according to a 20% loss rate), the number of samples in each group is 38 cases, and the total number of samples in the 4 subgroups is 152 cases.

## 2.6. Randomization and blinding

The statistician outside the study will use SPSS 25.0 to generate two different sets of random numbers lists with 76 numbers in each. The random numbers in each list will be arranged in ascending order, with No. 1-38 for the control group and 39-76 for the acupuncture group. Subjects will enter the control group or the acupuncture group according to the random numbers corresponding to the order of signing the informed consent in a ratio of 1:1.

Random numbers and treatment protocols will be printed on the subject's treatment card and placed in an opaque envelope by an independent investigator. Each enrolled subject will be assigned to an order number and receive an envelope with their name on it. The acupuncturist will check whether the envelope was sealed and will open and remove the treatment card. During the trial, the generation of a random numbers list, subjects' recruitment, acupuncture treatment, outcome measures assessment, and follow-up will be performed independently by different researchers. Only the outside assistant and the acupuncturist will be aware of the allocation. Participants and other

1  
2  
3 relevant researchers will be blinded to the allocation.  
4  
5  
6

## 7 **2.7 Data Collection and Management**

9 Data will be collected at the baseline (one week before the first intervention), post  
10 intervention (at the end of intervention), one-week follow-up and one-month follow-  
11 up. Each visit will comprise three assessments: (1) subjects will complete sleep-related  
12 questionnaires independently in a private conference room at Yueyang Hospital of  
13 Integrated Traditional Chinese and Western Medicine, Shanghai University of  
14 Traditional Chinese Medicine. Completion of the questionnaires will require  
15 approximately 30 min; during this time, outcome assessors will be available to answer  
16 questions; (2) subjects will complete a sleep diary at home under the guidance of  
17 outcome assessors; (3) subjects will undergo one-night PSG at the baseline, ACT before  
18 and after the intervention. Outcome assessors will be trained to promote participant  
19 retention, collect good quality data and complete follow-up. Data analysts will be  
20 trained on data entry, coding, security and storage. Statisticians in the research team  
21 will provide training on data assessment and analysis. Maintenance of participant  
22 confidentiality will be involved: (1) asking subjects only share personal and study-  
23 related information during our study; (2) storing data in the password-protected files on  
24 a designated specific computer with restricted access; (3) Only the research-related  
25 person have access to personal identifiable information, which will be destroyed once  
26 the study is completed. Technical appendix, statistical code, and dataset available from  
27 the ResMan ([www.medresman.org](http://www.medresman.org)).  
28  
29  
30  
31  
32  
33  
34  
35  
36  
37  
38  
39  
40  
41  
42  
43  
44  
45  
46  
47

## 48 **2.8 Statistics and Analysis**

49 The statistics and analysis of all data will be performed by two analytical researchers  
50 independent of the trial. SPSS 25.0 will be used for statistical analysis. For the  
51 measurement data that conform to the normal distribution and homogeneous variance,  
52 the mean  $\pm$  standard deviation will be used to describe the discrete tendency and central  
53 tendency. The comparison between the two groups will be performed by independent-  
54 samples t test. The comparison of multiple time points will be based on repeated  
55  
56  
57  
58  
59  
60

1  
2  
3  
4 measurement data combined with multivariate analysis of variance. Measurement data  
5 that do not conform to the normal distribution will be described by median, minimum,  
6 and maximum. The Mann-Whitney U rank sum test will be used for comparison  
7 between the two groups. The intra-group comparison will be based on the Friedman(F)  
8 rank sum test of the relevant samples.  
9  
10  
11  
12

13 The enumeration data will be expressed by frequency and constituent ratio. If the  
14 analysis index is two-category and multi-category unordered data, the comparison  
15 between groups will be performed by  $\chi^2$  test. If the analysis index is hierarchical order  
16 enumeration data, the Mann-Whitney U rank sum test will be used for the intra-group  
17 comparison.  
18  
19  
20  
21  
22

23 All statistical tests will be performed on a two-sided test, and  $P \leq 0.05$  will be  
24 considered statistically significant.  
25  
26  
27  
28  
29

### 30 **3. Discussion**

31  
32 Some scholars have suggested that insomnia can be divided into two phenotypes  
33 based on objective sleep duration, namely, insomnia with short sleep duration and with  
34 normal sleep duration. The former is an important phenotype of insomnia and has more  
35 serious health hazards [3-9]. At present, the treatment of insomnia tends to be biologically  
36 based (represented by benzodiazepine receptor agonists) and behaviourally based  
37 (represented by CBT-I). Most of the diagnosis and treatment guidelines of sleep  
38 disorders recommend CBT-I as the primary choice for treatment of insomnia and drug  
39 therapy as the secondary choice [11-13]. However, studies have shown that patients with  
40 insomnia with a short sleep duration are not sensitive to CBT-I treatment [14], so these  
41 patients can only resort to drug therapy. However, drug therapy has many adverse  
42 reactions, such as hangover effects, cognitive impairment and drug addiction [15-16]. It  
43 is important to seek safe and effective complementary and alternative medicine with  
44 few side effects. This is the basis of our research. Acupuncture treatment for insomnia  
45 provides such an opportunity.  
46  
47  
48  
49  
50  
51  
52  
53  
54  
55  
56  
57  
58

59 In this study, our first purpose is to determine whether acupuncture has a therapeutic  
60

1  
2  
3  
4 effect on insomnia compared with the placebo acupuncture group. Second, we will  
5  
6 determine whether acupuncture has a curative effect on insomnia with short sleep  
7  
8 duration. Finally, we will examine whether acupuncture treatment for two phenotypes  
9  
10 of insomnia has a difference in efficacy.

11  
12 In fact, past studies have not completely found a reliable method to properly define  
13  
14 the insomnia phenotype, which is largely due to the lack of biomarkers for insomnia or  
15  
16 objective indicators that can be used for classification. Some clinical practice guidelines  
17  
18 do not recommend PSG as a diagnostic tool and a severity assessment tool for insomnia  
19  
20 [61]. However, an increasing number of studies have shown that the use of objective  
21  
22 sleep assessment tools to classify insomnia has a great effect on the analysis of many  
23  
24 potential disease incidences [9-10,62]. This study provides further support for the use of  
25  
26 an objective sleep index to help diagnose and treat the specific phenotypes of insomnia.

27  
28 This study used actigraphy as a sleep time measurement tool and an objective  
29  
30 assessment tool for sleep without introducing the PSG. Compared with actigraphy, PSG  
31  
32 requires a bed rest time of approximately 8 h, but actigraphy does not have this  
33  
34 limitation. By reviewing the previous literature comparing the differences between the  
35  
36 two measurement tools [52-53,63-64], actigraphy has a good fit to PSG in assessing the time  
37  
38 of sleep and wakefulness in insomnia patients. However, to a certain extent, actigraphy  
39  
40 is more likely to underestimate sleep maintenance time and overestimate the total  
41  
42 arousal time, which may result in some of the subjects with a total sleep time > 6 h  
43  
44 being included in the group of patients with insomnia with short sleep duration.  
45  
46 However, first, the gap is small. Second, the conclusions of these differences under this  
47  
48 inclusion criterion may represent a greater actual difference between the two  
49  
50 phenotypes. In addition, using one-night PSG to evaluate the subject's objective sleep  
51  
52 time has a first-night effect. Therefore, we chose a week of actigraphy data to assess  
53  
54 the objective indicators. Moreover, previous studies have shown that actigraphy can be  
55  
56 used as a useful and efficient tool to assess the sleep patterns of individuals in their own  
57  
58 sleep environment [65-66].

59  
60 This study is the first trial to use acupuncture as an intervention to treat different  
phenotypes of insomnia. Our conclusions will expand the research results of previous

1  
2  
3  
4 studies and will further explain that insomnia with short objective sleep duration is a  
5 biologically more serious insomnia phenotype. These patients require more specific  
6 attention and more specific treatment options.  
7  
8  
9

## 10 11 **Acknowledgements**

12  
13  
14 The authors thank Mrs Cong-quan Yin and Pro Xiao-peng Ma for their comments and  
15 suggestions on the protocol.  
16  
17  
18  
19

## 20 21 **Author Contributions**

22  
23 CW and YFC conceived the research plan. CW and WJY drafted the protocol. XTY,  
24 CF, JIL and JD coordinated the study. WLX, YXZ and CW recruited the subjects. CW  
25 and WJY formed the analysis plan. All authors participated in, read and approved the  
26 final manuscript.  
27  
28  
29  
30  
31  
32  
33

## 34 35 **Funding**

36 This work was supported by: The Construction of Chinese Medicine Heritage  
37 Innovation Platform (Project No.: ZY (2018-2020)-CCCX-2004-03); The Shanghai  
38 Science and Technology Commission (Project No.: 18401971000); The Shanghai  
39 Municipal Commission of Health and Family Planning (Project No.:  
40 ZYKC201703006); The National Natural Science Funds of China (Grant No.  
41 81503631); The Interdisciplinary Project of “Clinical Immunology of Traditional  
42 Chinese Medicine” in Shanghai (Project No.: 30304113598).  
43  
44  
45  
46  
47  
48

49 This funding source had no role in the design of this study and will not have any role  
50 during its execution, analyses, interpretation of the data, or decision to submit results.  
51  
52  
53  
54  
55

## 56 57 **Competing interests**

58 None declared.  
59  
60

## Patient consent for publication

Obtained.

## Ethics approval

The trial has been approved by the ethics committee of Yueyang Hospital of Integrated Traditional Chinese and Western Medicine (No.: 2019-17).

## Provenance and peer review

Not commissioned; externally peer reviewed.

## References

- [1] Suh S, Cho N, Zhang J. Sex Differences in Insomnia: from Epidemiology and Etiology to Intervention. *Curr Psychiatry Rep.* 2018 ;20(9):69.
- [2] Knutson KL, Van Cauter E, Rathouz PJ, et al. Trends in the prevalence of short sleepers in the USA: 1975-2006. *Sleep.* 2010; 33(1): 37–45.
- [3] Dashti HS, Scheer FAJL, Jacques PF, et al. Short Sleep Duration and Dietary Intake: Epidemiologic Evidence, Mechanisms, and Health Implications. *Adv Nutr.* 2015;6(6):648-659.
- [4] Ayas NT, White DP, Al-Delaimy WK, et al. A Prospective Study of Self-Reported Sleep Duration and Incident Diabetes in Women. *Diabetes Care.* 2003;26(2):380-384.
- [5] Tobaldini E, Fiorelli EM, Solbiati M, et al. Short sleep duration and cardiometabolic risk: from pathophysiology to clinical evidence. *Nat Rev Cardiol.* 2018; doi: 10.1038/s41569-018-0109-6.
- [6] Li J, Huang Z, Hou J, et al. Sleep and CKD in Chinese Adults: A Cross-Sectional Study. *Clin J Am Soc Nephrol.* 2017; 12(6):885-892.
- [7] Vgontzas AN, Liao D, Bixler EO, et al. Insomnia with objective short sleep duration is associated with a high risk for hypertension. *Sleep* 2009; 32:491–497.
- [8] Rosinger AY, Chang AM, Buxton O, et al. Short sleep duration is associated with

- 1  
2  
3  
4 inadequate hydration: Cross-cultural evidence from US and Chinese adults, *Sleep*, 2018 Nov  
5 5. doi: 10.1093/sleep/zsy210. [Epub ahead of print]  
6  
7 [9] Sivertsen B, Pallesen S, Glozier N, et al. Midlife insomnia and subsequent mortality: The  
8 Hordaland health study. *BMC Public Health*. 2014;14: 720.  
9  
10 [10] Vgontzas AN, Fernandez-Mendoza J. Insomnia with short sleep duration: nosological,  
11 diagnostic, and treatment implications. *Sleep MedClin*. 2013; 8(3): 309–322.  
12  
13 [11] Qaseem A, Kansagara D, Forcica MA, et al. Management of Chronic Insomnia Disorder  
14 in Adults: A Clinical Practice Guideline from the American College of Physicians. *Ann Intern*  
15 *Med*. 2016; 165(2):125-133.  
16  
17 [12] Dieter Riemann, Chiara Baglioni, Claudio Bassett, European guideline for the diagnosis  
18 and treatment of insomnia. *European Sleep Research Society*. 2017; 26(6):675-700.  
19  
20 [13] Chinese Sleep Research Society. Guidelines for diagnosis and treatment of insomnia in  
21 China. *Natl Med J China*. 2017; 97(24): 1844-1856.  
22  
23 [14] Bathgate CJ, Edinger JD, Krystal AD. Insomnia Patients with Objective Short Sleep  
24 Duration Have a Blunted Response to Cognitive Behavioral Therapy for Insomnia. *Sleep*. 2017;  
25 40(1). doi: 10.1093/sleep/zsw012.  
26  
27 [15] Buscemi N, Vandermeer B, Friesen C, et al. The efficacy and safety of drug treatments for  
28 chronic insomnia in adults: a meta-analysis of RCTs. *J Gen Intern Med*. 2007;22(9): 1335–  
29 1350.  
30  
31 [16] Akemi Miyata, Kunihiro Iwamoto, Naoko Kawano, et al. The effects of acute treatment  
32 with ramelteon, triazolam, and placebo on driving performance, cognitive function, and  
33 equilibrium function in healthy volunteers. *Psychopharmacology*. 2015; 232(12): 2127-37.  
34  
35 [17] Sarris J, Byrne GJ. A systematic review of insomnia and complementary medicine. *Sleep*  
36 *Med Rev*. 2011; 15(2):99-106.  
37  
38 [18] Yin X, Gou M, Xu J, et al. Efficacy and safety of acupuncture treatment on primary  
39 insomnia: a randomized controlled trial. *Sleep Med*. 2017; 37:193-200.  
40  
41 [19] Fu C, Zhao N, Liu Z. Acupuncture Improves Peri-menopausal Insomnia: A Randomized  
42 Controlled Trial. *Sleep*. 2017;40(11). doi: 10.1093/sleep/zsx153  
43  
44 [20] Cheuk DK, Yeung WF, Chung KF, et al. Acupuncture for insomnia. *Cochrane Database*  
45 *Syst Rev*. 2012; (9): CD005472.  
46  
47  
48  
49  
50  
51  
52  
53  
54  
55  
56  
57  
58  
59  
60



- 1  
2  
3  
4 [21] Buysse DJ, Ancoli-Israel S, Edinger JD, et al. Recommendations for a standard research  
5 assessment of insomnia. *Sleep*.2006;29(9):1155-1173.  
6  
7 [22] Buysse DJ, Reynolds CF, Monk TH, et al. The Pittsburgh Sleep Quality Index (PSQI): A  
8 new instrument for psychiatric research and practice. *Psychiatry Res*. 1989; 28:193-213.  
9  
10 [23] Morin CM. *Insomnia: Psychological assessment and management*. New York-London:  
11 The Guilford Press; 1993.  
12  
13 [24] Bastien CH, Vallières A, Morin CM. Validation of the Insomnia Severity Index as an  
14 outcome measure for insomnia research. *Sleep Med*. 2001;2(4): 297–307.  
15  
16 [25] Ancoli-Israel S. Actigraphy. In: Kryger MH, Roth T, Dement WC, eds. *Principles and*  
17 *practice of sleep medicine, fourth edition*. 4th ed. Philadelphia, PA: Saunders; 2005:1459-1467.  
18  
19 [26] Sateia MJ. Epidemiology, consequences, and evaluation of insomnia. In: Lee-Chiong TL,  
20 Sateia MJ, Carskadon MA, eds. *Sleep Medicine*. Philadelphia, PA: Hanley and Belfus; 2002:  
21 151-160.  
22  
23 [27] Manne S, Nereo N, DuHamel K, et al. Anxiety and depression in mothers of children  
24 undergoing bone marrow transplant: symptom prevalence and use of the Beck depression and  
25 Beck anxiety inventories as screening instruments. *J Consult Clin Psychol*. 2001;69(6):1037-  
26 1047.  
27  
28 [28] Beck AT, Steer RA, Ball R, et al. Comparison of Beck Depression Inventories -IA and -II  
29 in psychiatric outpatients. *J Pers Assess*.1996;67:588-597.  
30  
31 [29] Krupp LB, LaRocca NG, Muir-Nash J, et al. The fatigue severity scale: Application to  
32 patients with multiple sclerosis and systemic lupus erythematosus. *Arch Neurol*. 1989;  
33 46:1121-1123.  
34  
35 [30] Schutte-Rodin S, Broch L, Buysse D, et al. Clinical guideline for the evaluation and  
36 management of chronic insomnia in adults. *J Clin Sleep Med*. 2008;4(5):487-504.  
37  
38 [31] Michael Sateia. *American Academy of Sleep Medicine. International Classification of*  
39 *Sleep Disorders (Third Edition)*. USA: American Academy of Sleep Medicine.2014; 3rd ed.  
40  
41 [32] Ibáñez V, Silva J, Cauli O. A survey on sleep questionnaires and diaries. *Sleep Med*. 2018;  
42 42:90-96.  
43  
44 [33] AP A. *Diagnostic and statistical manual of mental disorders: DSM- V*. Washington (DC):  
45 American Psychiatric Publishing; 2013.  
46  
47  
48  
49  
50  
51  
52  
53  
54  
55  
56  
57  
58  
59  
60

- 1  
2  
3  
4 [34] Yeung WF, Chung KF, Zhang SP, et al. Electroacupuncture for primary insomnia: a  
5 randomized controlled trial. *Sleep*. 2009; 32(8):1039–1047.  
6  
7 [35] Huang W, Kutner N, Bliwise DL. A systematic review of the effects of acupuncture in  
8 treating insomnia. *Sleep Med Rev*. 2009;13(1):73-104.  
9  
10 [36] Huang KY, Liang S, Xu YT, et al. Law of acupoint selection in acupuncture treatment for  
11 insomnia based on data mining method. *Chinese acupuncture and moxibustion*.  
12 2015;35(9):960-963.  
13  
14 [37] White AR, Filshie J, Cummings TM; International Acupuncture Research Forum. Clinical  
15 trials of acupuncture: consensus recommendations for optimal treatment, sham controls and  
16 blinding. *Complement Ther Med*. 2001; 9(4): 237–245.  
17  
18 [38] Zhou W, Benharash P. Significance of "Deqi" response in acupuncture treatment: myth or  
19 reality. *J Acupunct Meridian Stud*. 2014;7(4):186-189.  
20  
21 [39] Streitberger K, Kleinhenz J. Introducing a placebo needle into acupuncture research.  
22 *Lancet*. 1998; 352(9125): 364–365.  
23  
24 [40] Yeung WF, Chung KF, Tso KC, et al. Electroacupuncture for residual insomnia associated  
25 with major depressive disorder: a randomized controlled trial. *Sleep*. 2011; 34(6):807–815.  
26  
27 [41] Kim M, Kim JE, Lee HY, et al. Electroacupuncture for treating insomnia in patients with  
28 cancer: a study protocol for a randomised pilot clinical trial. *BMJ Open*. 2017; 7(8): e016269.  
29 doi: 10.1136/bmjopen-2017-016269.  
30  
31 [42] Xie CC, Wen XY, Jiang L, et al. Validity of the "streitberger" needle in a Chinese  
32 population with acupuncture: a randomized, single blinded, and crossover pilot study. *Evid*  
33 *Based Complement Alternat Med*. 2013; 2013: 251603.  
34  
35 [43] Mollayeva T, Thurairajah P, Burton K, et al. The Pittsburgh Sleep Quality Index as a  
36 screening tool for sleep dysfunction in clinical and nonclinical samples: a systematic review  
37 and meta-analysis. *Sleep Med Rev*. 2016; 25:52–73.  
38  
39 [44] Pilz LK, Keller LK, Lenssen D. Time to rethink sleep quality: PSQI scores reflect sleep  
40 quality on workdays. *Sleep*. 2018;41(5). doi: 10.1093/sleep/zsy029.  
41  
42 [45] Backhaus J, Junghanns K, Broocks A, et al. Test-retest reliability and validity of the  
43 Pittsburgh Sleep Quality Index in primary insomnia. *J Psychosom Res*. 2002; 53(3): 737–740.  
44  
45 [46] Zheng B, Li M, Wang KL, et al. Analysis of the reliability and validity of the Chinese  
46  
47  
48  
49  
50  
51  
52  
53  
54  
55  
56  
57  
58  
59  
60

- 1  
2  
3  
4 version of Pittsburgh sleep quality index among medical college students. *Beijing Da Xue Xue*  
5 *Bao*. 2016; 48(3): 424–428.
- 6  
7 [47] Liu XC, Tang MQ, Hu L, et al. Reliability and validity of the Pittsburgh sleep quality index.  
8 *Chin J Psychiatry*. 1996; 29(2): 103-107.
- 9  
10 [48] Chen PY, Yang CM, Morin CM. Validating the cross-cultural factor structure and  
11 invariance property of the Insomnia Severity Index: evidence based on ordinal EFA and CFA.  
12 *Sleep Med*. 2015;16(5):598-603.
- 13  
14 [49] Morin CM, Belleville G, Bélanger L, et al. The Insomnia Severity Index: psychometric  
15 indicators to detect insomnia cases and evaluate treatment response. *Sleep*. 2011;34(5):601-608.
- 16  
17 [50] Yu DS. Insomnia Severity Index: psychometric properties with Chinese community  
18 dwelling older people. *J Adv Nurs*. 2010; 66(10):2350–2359.
- 19  
20 [51] Lichstein KL, Stone KC, Donaldson J, et al. Actigraphy validation with insomnia. *Sleep*.  
21 2006; 29:232-239.
- 22  
23 [52] Vallières A, Morin CM. Actigraphy in the assessment of insomnia. *Sleep*. 2003; 26(7):  
24 902–906.
- 25  
26 [53] Natale V, Plazzi G, Martoni M. Actigraphy in the assessment of insomnia: a quantitative  
27 approach. *Sleep*. 2009 ;32(6):767-771.
- 28  
29 [54] Beck AT, Epstein N, Brown G, et al. An inventory for measuring clinical anxiety:  
30 psychometric properties. *Consult Clin Psychol*. 1988; 56(6): 893-897.
- 31  
32 [55] Ceng KW, Wong CW, Wong KC, et al. A Study of Psychometric Properties, Normative  
33 Scores and Factor Structure of Beck Anxiety Inventory Chinese Version. *Chinese Journal of*  
34 *Clinical Psychology*. 2002;10(1):4-6.
- 35  
36 [56] Wang Z, Yuan CM, Huang J, et al. Reliability and validity of the Chinese version of Beck  
37 Depression Inventory-II among depression patients. *Chinese Mental Health Journal*. 2011,  
38 25(6): 476-480.
- 39  
40 [57] Lichstein KL, Durrence HH, Riedel BW, et al. *Epidemiology of Sleep: Age, Gender, and*  
41 *Ethnicity*. New Jersey: Lawrence Erlbaum Associates, Inc.; 2004.
- 42  
43 [58] Wang MY, Liu IC, Chiu CH, et al. Cultural adaptation and validation of the Chinese  
44 version of the Fatigue Severity Scale in patients with major depressive disorder and  
45 nondepressive people. *Qual Life Res*. 2016 ;25(1):89-99.
- 46  
47  
48  
49  
50  
51  
52  
53  
54  
55  
56  
57  
58  
59  
60

- 1  
2  
3  
4 [59] Levine J, Schooler NR. SAFTEE: A technique for the systematic assessment of side effects  
5 in clinical trials. *Psychopharmacol Bull.* 1986; 22(2):343–381.  
6  
7 [60] Sakpal TV. Sample size estimation in clinical trial. *Perspect Clin Res.* 2010;1(2):67-69.  
8  
9 [61] Littner M, Hirshkowitz M, Kramer M, et al. Practice parameters for using  
10 polysomnography to evaluate insomnia: an update. *Sleep.* 2003; 26(6): 754–760.  
11  
12 [62] Fernandez-Mendoza J, Shea S, Vgontzas AN, et al. Insomnia and incident depression: role  
13 of objective sleep duration and natural history. *J Sleep Res.* 2015; 24(4): 390–398.  
14  
15 [63] Edinger JD, Means MK, Stechuchak KM, et al. A pilot study of inexpensive sleep  
16 assessment devices. *Behav Sleep Med.* 2004; 2(1): 41–49.  
17  
18 [64] Friedman L, Benson K, Noda A, et al. An actigraphic comparison of sleep restriction and  
19 sleep hygiene treatments for insomnia in older adults. *J Geriatr Psychiatry Neurol.* 2000; 13(1):  
20 17–27.  
21  
22 [65] Ancoli-Israel S, Cole R, Alessi C, et al. The role of actigraphy in the study of sleep and  
23 circadian rhythms. *Sleep.* 2003; 26(3): 342–392.  
24  
25 [66] Sánchez-Ortuño MM, Edinger JD, Means MK, et al. Home is where sleep is: an ecological  
26 approach to test the validity of actigraphy for the assessment of insomnia. *J Clin Sleep Med.*  
27 2010; 6(1):21–29.  
28  
29  
30  
31  
32  
33  
34  
35  
36  
37  
38  
39  
40  
41  
42  
43  
44  
45  
46  
47  
48  
49  
50  
51  
52  
53  
54  
55  
56  
57  
58  
59  
60

# Reporting checklist for protocol of a clinical trial.

Based on the SPIRIT guidelines.

## Instructions to authors

Complete this checklist by entering the page numbers from your manuscript where readers will find each of the items listed below.

Your article may not currently address all the items on the checklist. Please modify your text to include the missing information. If you are certain that an item does not apply, please write "n/a" and provide a short explanation.

Upload your completed checklist as an extra file when you submit to a journal.

In your methods section, say that you used the SPIRIT reporting guidelines, and cite them as:

Chan A-W, Tetzlaff JM, Altman DG, Laupacis A, Gøtzsche PC, Krleža-Jerić K, Hróbjartsson A, Mann H, Dickersin K, Berlin J, Doré C, Parulekar W, Summerskill W, Groves T, Schulz K, Sox H, Rockhold FW, Rennie D, Moher D. SPIRIT 2013 Statement: Defining standard protocol items for clinical trials. *Ann Intern Med.* 2013;158(3):200-207

|                                             |                     | Reporting Item                                                                                               | Page Number |
|---------------------------------------------|---------------------|--------------------------------------------------------------------------------------------------------------|-------------|
| <b>Administrative information</b>           |                     |                                                                                                              |             |
| Title                                       | <a href="#">#1</a>  | Descriptive title identifying the study design, population, interventions, and, if applicable, trial acronym | 1           |
| Trial registration                          | <a href="#">#2a</a> | Trial identifier and registry name. If not yet registered, name of intended registry                         | 1           |
| Trial registration: data set                | <a href="#">#2b</a> | All items from the World Health Organization Trial Registration Data Set                                     | 1           |
| Protocol version                            | <a href="#">#3</a>  | Date and version identifier                                                                                  | n/a         |
| Funding                                     | <a href="#">#4</a>  | Sources and types of financial, material, and other support                                                  | 18          |
| Roles and responsibilities: contributorship | <a href="#">#5a</a> | Names, affiliations, and roles of protocol contributors                                                      | 18          |

|    |                           |                     |                                                                      |     |
|----|---------------------------|---------------------|----------------------------------------------------------------------|-----|
| 1  | Roles and                 | <a href="#">#5b</a> | Name and contact information for the trial sponsor                   | n/a |
| 2  | responsibilities:         |                     |                                                                      |     |
| 3  | sponsor contact           |                     |                                                                      |     |
| 4  | information               |                     |                                                                      |     |
| 5  |                           |                     |                                                                      |     |
| 6  |                           |                     |                                                                      |     |
| 7  |                           |                     |                                                                      |     |
| 8  | Roles and                 | <a href="#">#5c</a> | Role of study sponsor and funders, if any, in study design;          | n/a |
| 9  | responsibilities:         |                     | collection, management, analysis, and interpretation of data;        |     |
| 10 | sponsor and funder        |                     | writing of the report; and the decision to submit the report for     |     |
| 11 |                           |                     | publication, including whether they will have ultimate authority     |     |
| 12 |                           |                     | over any of these activities                                         |     |
| 13 |                           |                     |                                                                      |     |
| 14 |                           |                     |                                                                      |     |
| 15 |                           |                     |                                                                      |     |
| 16 | Roles and                 | <a href="#">#5d</a> | Composition, roles, and responsibilities of the coordinating centre, | n/a |
| 17 | responsibilities:         |                     | steering committee, endpoint adjudication committee, data            |     |
| 18 | committees                |                     | management team, and other individuals or groups overseeing the      |     |
| 19 |                           |                     | trial, if applicable (see Item 21a for data monitoring committee)    |     |
| 20 |                           |                     |                                                                      |     |
| 21 |                           |                     |                                                                      |     |
| 22 |                           |                     |                                                                      |     |
| 23 | <b>Introduction</b>       |                     |                                                                      |     |
| 24 |                           |                     |                                                                      |     |
| 25 | Background and            | <a href="#">#6a</a> | Description of research question and justification for undertaking   | 3   |
| 26 | rationale                 |                     | the trial, including summary of relevant studies (published and      |     |
| 27 |                           |                     | unpublished) examining benefits and harms for each intervention      |     |
| 28 |                           |                     |                                                                      |     |
| 29 |                           |                     |                                                                      |     |
| 30 | Background and            | <a href="#">#6b</a> | Explanation for choice of comparators                                | 3   |
| 31 | rationale: choice of      |                     |                                                                      |     |
| 32 | comparators               |                     |                                                                      |     |
| 33 |                           |                     |                                                                      |     |
| 34 |                           |                     |                                                                      |     |
| 35 |                           |                     |                                                                      |     |
| 36 | Objectives                | <a href="#">#7</a>  | Specific objectives or hypotheses                                    | 4   |
| 37 |                           |                     |                                                                      |     |
| 38 | Trial design              | <a href="#">#8</a>  | Description of trial design including type of trial (eg, parallel    | 4   |
| 39 |                           |                     | group, crossover, factorial, single group), allocation ratio, and    |     |
| 40 |                           |                     | framework (eg, superiority, equivalence, non-inferiority,            |     |
| 41 |                           |                     | exploratory)                                                         |     |
| 42 |                           |                     |                                                                      |     |
| 43 |                           |                     |                                                                      |     |
| 44 |                           |                     |                                                                      |     |
| 45 | <b>Methods:</b>           |                     |                                                                      |     |
| 46 | <b>Participants,</b>      |                     |                                                                      |     |
| 47 | <b>interventions, and</b> |                     |                                                                      |     |
| 48 | <b>outcomes</b>           |                     |                                                                      |     |
| 49 |                           |                     |                                                                      |     |
| 50 |                           |                     |                                                                      |     |
| 51 |                           |                     |                                                                      |     |
| 52 | Study setting             | <a href="#">#9</a>  | Description of study settings (eg, community clinic, academic        | 4   |
| 53 |                           |                     | hospital) and list of countries where data will be collected.        |     |
| 54 |                           |                     | Reference to where list of study sites can be obtained               |     |
| 55 |                           |                     |                                                                      |     |
| 56 |                           |                     |                                                                      |     |
| 57 | Eligibility criteria      | <a href="#">#10</a> | Inclusion and exclusion criteria for participants. If applicable,    | 7   |
| 58 |                           |                     | eligibility criteria for study centres and individuals who will      |     |
| 59 |                           |                     |                                                                      |     |
| 60 |                           |                     |                                                                      |     |

|    |                              |                                                                                            |     |
|----|------------------------------|--------------------------------------------------------------------------------------------|-----|
|    |                              | perform the interventions (eg, surgeons, psychotherapists)                                 |     |
| 1  |                              |                                                                                            |     |
| 2  | Interventions:               | <a href="#">#11a</a> Interventions for each group with sufficient detail to allow          | 8   |
| 3  | description                  | replication, including how and when they will be administered                              |     |
| 4  |                              |                                                                                            |     |
| 5  | Interventions:               | <a href="#">#11b</a> Criteria for discontinuing or modifying allocated interventions for a | n/a |
| 6  | modifications                | given trial participant (eg, drug dose change in response to harms,                        |     |
| 7  |                              | participant request, or improving / worsening disease)                                     |     |
| 8  |                              |                                                                                            |     |
| 9  | Interventions:               | <a href="#">#11c</a> Strategies to improve adherence to intervention protocols, and any    | n/a |
| 10 | adherence                    | procedures for monitoring adherence (eg, drug tablet return;                               |     |
| 11 |                              | laboratory tests)                                                                          |     |
| 12 | Interventions:               | <a href="#">#11d</a> Relevant concomitant care and interventions that are permitted or     | n/a |
| 13 | concomitant care             | prohibited during the trial                                                                |     |
| 14 |                              |                                                                                            |     |
| 15 | Outcomes                     | <a href="#">#12</a> Primary, secondary, and other outcomes, including the specific         | n/a |
| 16 |                              | measurement variable (eg, systolic blood pressure), analysis metric                        |     |
| 17 |                              | (eg, change from baseline, final value, time to event), method of                          |     |
| 18 |                              | aggregation (eg, median, proportion), and time point for each                              |     |
| 19 |                              | outcome. Explanation of the clinical relevance of chosen efficacy                          |     |
| 20 |                              | and harm outcomes is strongly recommended                                                  |     |
| 21 | Participant timeline         | <a href="#">#13</a> Time schedule of enrolment, interventions (including any run-ins       | 6   |
| 22 |                              | and washouts), assessments, and visits for participants. A                                 |     |
| 23 |                              | schematic diagram is highly recommended (see Figure)                                       |     |
| 24 |                              |                                                                                            |     |
| 25 | Sample size                  | <a href="#">#14</a> Estimated number of participants needed to achieve study               | 13  |
| 26 |                              | objectives and how it was determined, including clinical and                               |     |
| 27 |                              | statistical assumptions supporting any sample size calculations                            |     |
| 28 |                              |                                                                                            |     |
| 29 | Recruitment                  | <a href="#">#15</a> Strategies for achieving adequate participant enrolment to reach       | 7   |
| 30 |                              | target sample size                                                                         |     |
| 31 |                              |                                                                                            |     |
| 32 |                              |                                                                                            |     |
| 33 |                              |                                                                                            |     |
| 34 |                              |                                                                                            |     |
| 35 |                              |                                                                                            |     |
| 36 |                              |                                                                                            |     |
| 37 |                              |                                                                                            |     |
| 38 |                              |                                                                                            |     |
| 39 |                              |                                                                                            |     |
| 40 |                              |                                                                                            |     |
| 41 |                              |                                                                                            |     |
| 42 |                              |                                                                                            |     |
| 43 |                              |                                                                                            |     |
| 44 |                              |                                                                                            |     |
| 45 | <b>Methods: Assignment</b>   |                                                                                            |     |
| 46 | <b>of interventions (for</b> |                                                                                            |     |
| 47 | <b>controlled trials)</b>    |                                                                                            |     |
| 48 |                              |                                                                                            |     |
| 49 |                              |                                                                                            |     |
| 50 | Allocation: sequence         | <a href="#">#16a</a> Method of generating the allocation sequence (eg, computer-           | 14  |
| 51 | generation                   | generated random numbers), and list of any factors for                                     |     |
| 52 |                              | stratification. To reduce predictability of a random sequence,                             |     |
| 53 |                              | details of any planned restriction (eg, blocking) should be provided                       |     |
| 54 |                              | in a separate document that is unavailable to those who enrol                              |     |
| 55 |                              | participants or assign interventions                                                       |     |
| 56 |                              |                                                                                            |     |
| 57 |                              |                                                                                            |     |
| 58 |                              |                                                                                            |     |
| 59 |                              |                                                                                            |     |
| 60 |                              |                                                                                            |     |

|    |                        |                      |                                                                       |     |
|----|------------------------|----------------------|-----------------------------------------------------------------------|-----|
| 1  | Allocation concealment | <a href="#">#16b</a> | Mechanism of implementing the allocation sequence (eg, central        | 14  |
| 2  | mechanism              |                      | telephone; sequentially numbered, opaque, sealed envelopes),          |     |
| 3  |                        |                      | describing any steps to conceal the sequence until interventions are  |     |
| 4  |                        |                      | assigned                                                              |     |
| 5  |                        |                      |                                                                       |     |
| 6  |                        |                      |                                                                       |     |
| 7  |                        |                      |                                                                       |     |
| 8  | Allocation:            | <a href="#">#16c</a> | Who will generate the allocation sequence, who will enrol             | 14  |
| 9  | implementation         |                      | participants, and who will assign participants to interventions       |     |
| 10 |                        |                      |                                                                       |     |
| 11 | Blinding (masking)     | <a href="#">#17a</a> | Who will be blinded after assignment to interventions (eg, trial      | 14  |
| 12 |                        |                      | participants, care providers, outcome assessors, data analysts), and  |     |
| 13 |                        |                      | how                                                                   |     |
| 14 |                        |                      |                                                                       |     |
| 15 |                        |                      |                                                                       |     |
| 16 |                        |                      |                                                                       |     |
| 17 | Blinding (masking):    | <a href="#">#17b</a> | If blinded, circumstances under which unblinding is permissible,      | 14  |
| 18 | emergency unblinding   |                      | and procedure for revealing a participant's allocated intervention    |     |
| 19 |                        |                      | during the trial                                                      |     |
| 20 |                        |                      |                                                                       |     |
| 21 |                        |                      |                                                                       |     |
| 22 | <b>Methods: Data</b>   |                      |                                                                       |     |
| 23 | <b>collection,</b>     |                      |                                                                       |     |
| 24 | <b>management, and</b> |                      |                                                                       |     |
| 25 | <b>analysis</b>        |                      |                                                                       |     |
| 26 |                        |                      |                                                                       |     |
| 27 |                        |                      |                                                                       |     |
| 28 |                        |                      |                                                                       |     |
| 29 | Data collection plan   | <a href="#">#18a</a> | Plans for assessment and collection of outcome, baseline, and other   | 15  |
| 30 |                        |                      | trial data, including any related processes to promote data quality   |     |
| 31 |                        |                      | (eg, duplicate measurements, training of assessors) and a             |     |
| 32 |                        |                      | description of study instruments (eg, questionnaires, laboratory      |     |
| 33 |                        |                      | tests) along with their reliability and validity, if known. Reference |     |
| 34 |                        |                      | to where data collection forms can be found, if not in the protocol   |     |
| 35 |                        |                      |                                                                       |     |
| 36 |                        |                      |                                                                       |     |
| 37 |                        |                      |                                                                       |     |
| 38 |                        |                      |                                                                       |     |
| 39 | Data collection plan:  | <a href="#">#18b</a> | Plans to promote participant retention and complete follow-up,        | 15  |
| 40 | retention              |                      | including list of any outcome data to be collected for participants   |     |
| 41 |                        |                      | who discontinue or deviate from intervention protocols                |     |
| 42 |                        |                      |                                                                       |     |
| 43 |                        |                      |                                                                       |     |
| 44 | Data management        | <a href="#">#19</a>  | Plans for data entry, coding, security, and storage, including any    | 15  |
| 45 |                        |                      | related processes to promote data quality (eg, double data entry;     |     |
| 46 |                        |                      | range checks for data values). Reference to where details of data     |     |
| 47 |                        |                      | management procedures can be found, if not in the protocol            |     |
| 48 |                        |                      |                                                                       |     |
| 49 |                        |                      |                                                                       |     |
| 50 |                        |                      |                                                                       |     |
| 51 | Statistics: outcomes   | <a href="#">#20a</a> | Statistical methods for analysing primary and secondary outcomes.     | 15  |
| 52 |                        |                      | Reference to where other details of the statistical analysis plan can |     |
| 53 |                        |                      | be found, if not in the protocol                                      |     |
| 54 |                        |                      |                                                                       |     |
| 55 |                        |                      |                                                                       |     |
| 56 | Statistics: additional | <a href="#">#20b</a> | Methods for any additional analyses (eg, subgroup and adjusted        | n/a |
| 57 | analyses               |                      | analyses)                                                             |     |
| 58 |                        |                      |                                                                       |     |
| 59 |                        |                      |                                                                       |     |
| 60 |                        |                      |                                                                       |     |



|    |                            |                      |                                                                         |     |
|----|----------------------------|----------------------|-------------------------------------------------------------------------|-----|
| 1  | Statistics: analysis       | <a href="#">#20c</a> | Definition of analysis population relating to protocol non-             | n/a |
| 2  | population and missing     |                      | adherence (eg, as randomised analysis), and any statistical methods     |     |
| 3  | data                       |                      | to handle missing data (eg, multiple imputation)                        |     |
| 4  |                            |                      |                                                                         |     |
| 5  |                            |                      |                                                                         |     |
| 6  | <b>Methods: Monitoring</b> |                      |                                                                         |     |
| 7  |                            |                      |                                                                         |     |
| 8  | Data monitoring:           | <a href="#">#21a</a> | Composition of data monitoring committee (DMC); summary of its          | n/a |
| 9  | formal committee           |                      | role and reporting structure; statement of whether it is independent    |     |
| 10 |                            |                      | from the sponsor and competing interests; and reference to where        |     |
| 11 |                            |                      | further details about its charter can be found, if not in the protocol. |     |
| 12 |                            |                      | Alternatively, an explanation of why a DMC is not needed                |     |
| 13 |                            |                      |                                                                         |     |
| 14 |                            |                      |                                                                         |     |
| 15 |                            |                      |                                                                         |     |
| 16 |                            |                      |                                                                         |     |
| 17 | Data monitoring:           | <a href="#">#21b</a> | Description of any interim analyses and stopping guidelines,            | n/a |
| 18 | interim analysis           |                      | including who will have access to these interim results and make        |     |
| 19 |                            |                      | the final decision to terminate the trial                               |     |
| 20 |                            |                      |                                                                         |     |
| 21 |                            |                      |                                                                         |     |
| 22 | Harms                      | <a href="#">#22</a>  | Plans for collecting, assessing, reporting, and managing solicited      | 11  |
| 23 |                            |                      | and spontaneously reported adverse events and other unintended          |     |
| 24 |                            |                      | effects of trial interventions or trial conduct                         |     |
| 25 |                            |                      |                                                                         |     |
| 26 |                            |                      |                                                                         |     |
| 27 |                            |                      |                                                                         |     |
| 28 | Auditing                   | <a href="#">#23</a>  | Frequency and procedures for auditing trial conduct, if any, and        | n/a |
| 29 |                            |                      | whether the process will be independent from investigators and the      |     |
| 30 |                            |                      | sponsor                                                                 |     |
| 31 |                            |                      |                                                                         |     |
| 32 |                            |                      |                                                                         |     |
| 33 | <b>Ethics and</b>          |                      |                                                                         |     |
| 34 | <b>dissemination</b>       |                      |                                                                         |     |
| 35 |                            |                      |                                                                         |     |
| 36 |                            |                      |                                                                         |     |
| 37 | Research ethics            | <a href="#">#24</a>  | Plans for seeking research ethics committee / institutional review      | 19  |
| 38 | approval                   |                      | board (REC / IRB) approval                                              |     |
| 39 |                            |                      |                                                                         |     |
| 40 |                            |                      |                                                                         |     |
| 41 | Protocol amendments        | <a href="#">#25</a>  | Plans for communicating important protocol modifications (eg,           | n/a |
| 42 |                            |                      | changes to eligibility criteria, outcomes, analyses) to relevant        |     |
| 43 |                            |                      | parties (eg, investigators, REC / IRBs, trial participants, trial       |     |
| 44 |                            |                      | registries, journals, regulators)                                       |     |
| 45 |                            |                      |                                                                         |     |
| 46 |                            |                      |                                                                         |     |
| 47 | Consent or assent          | <a href="#">#26a</a> | Who will obtain informed consent or assent from potential trial         | n/a |
| 48 |                            |                      | participants or authorised surrogates, and how (see Item 32)            |     |
| 49 |                            |                      |                                                                         |     |
| 50 |                            |                      |                                                                         |     |
| 51 | Consent or assent:         | <a href="#">#26b</a> | Additional consent provisions for collection and use of participant     | n/a |
| 52 | ancillary studies          |                      | data and biological specimens in ancillary studies, if applicable       |     |
| 53 |                            |                      |                                                                         |     |
| 54 |                            |                      |                                                                         |     |
| 55 | Confidentiality            | <a href="#">#27</a>  | How personal information about potential and enrolled participants      | 14  |
| 56 |                            |                      | will be collected, shared, and maintained in order to protect           |     |
| 57 |                            |                      | confidentiality before, during, and after the trial                     |     |
| 58 |                            |                      |                                                                         |     |
| 59 |                            |                      |                                                                         |     |
| 60 |                            |                      |                                                                         |     |

|    |                                             |                      |                                                                                                                                                                                                                                                                                     |     |
|----|---------------------------------------------|----------------------|-------------------------------------------------------------------------------------------------------------------------------------------------------------------------------------------------------------------------------------------------------------------------------------|-----|
| 1  | Declaration of interests                    | <a href="#">#28</a>  | Financial and other competing interests for principal investigators for the overall trial and each study site                                                                                                                                                                       | 18  |
| 2  |                                             |                      |                                                                                                                                                                                                                                                                                     |     |
| 3  |                                             |                      |                                                                                                                                                                                                                                                                                     |     |
| 4  | Data access                                 | <a href="#">#29</a>  | Statement of who will have access to the final trial dataset, and disclosure of contractual agreements that limit such access for investigators                                                                                                                                     | n/a |
| 5  |                                             |                      |                                                                                                                                                                                                                                                                                     |     |
| 6  |                                             |                      |                                                                                                                                                                                                                                                                                     |     |
| 7  |                                             |                      |                                                                                                                                                                                                                                                                                     |     |
| 8  |                                             |                      |                                                                                                                                                                                                                                                                                     |     |
| 9  |                                             |                      |                                                                                                                                                                                                                                                                                     |     |
| 10 | Ancillary and post trial care               | <a href="#">#30</a>  | Provisions, if any, for ancillary and post-trial care, and for compensation to those who suffer harm from trial participation                                                                                                                                                       | n/a |
| 11 |                                             |                      |                                                                                                                                                                                                                                                                                     |     |
| 12 |                                             |                      |                                                                                                                                                                                                                                                                                     |     |
| 13 |                                             |                      |                                                                                                                                                                                                                                                                                     |     |
| 14 | Dissemination policy: trial results         | <a href="#">#31a</a> | Plans for investigators and sponsor to communicate trial results to participants, healthcare professionals, the public, and other relevant groups (eg, via publication, reporting in results databases, or other data sharing arrangements), including any publication restrictions | n/a |
| 15 |                                             |                      |                                                                                                                                                                                                                                                                                     |     |
| 16 |                                             |                      |                                                                                                                                                                                                                                                                                     |     |
| 17 |                                             |                      |                                                                                                                                                                                                                                                                                     |     |
| 18 |                                             |                      |                                                                                                                                                                                                                                                                                     |     |
| 19 |                                             |                      |                                                                                                                                                                                                                                                                                     |     |
| 20 |                                             |                      |                                                                                                                                                                                                                                                                                     |     |
| 21 | Dissemination policy: authorship            | <a href="#">#31b</a> | Authorship eligibility guidelines and any intended use of professional writers                                                                                                                                                                                                      | n/a |
| 22 |                                             |                      |                                                                                                                                                                                                                                                                                     |     |
| 23 |                                             |                      |                                                                                                                                                                                                                                                                                     |     |
| 24 | Dissemination policy: reproducible research | <a href="#">#31c</a> | Plans, if any, for granting public access to the full protocol, participant-level dataset, and statistical code                                                                                                                                                                     | n/a |
| 25 |                                             |                      |                                                                                                                                                                                                                                                                                     |     |
| 26 |                                             |                      |                                                                                                                                                                                                                                                                                     |     |
| 27 |                                             |                      |                                                                                                                                                                                                                                                                                     |     |
| 28 | <b>Appendices</b>                           |                      |                                                                                                                                                                                                                                                                                     |     |
| 29 |                                             |                      |                                                                                                                                                                                                                                                                                     |     |
| 30 |                                             |                      |                                                                                                                                                                                                                                                                                     |     |
| 31 | Informed consent materials                  | <a href="#">#32</a>  | Model consent form and other related documentation given to participants and authorised surrogates                                                                                                                                                                                  | n/a |
| 32 |                                             |                      |                                                                                                                                                                                                                                                                                     |     |
| 33 |                                             |                      |                                                                                                                                                                                                                                                                                     |     |
| 34 | Biological specimens                        | <a href="#">#33</a>  | Plans for collection, laboratory evaluation, and storage of biological specimens for genetic or molecular analysis in the current trial and for future use in ancillary studies, if applicable                                                                                      | n/a |
| 35 |                                             |                      |                                                                                                                                                                                                                                                                                     |     |
| 36 |                                             |                      |                                                                                                                                                                                                                                                                                     |     |
| 37 |                                             |                      |                                                                                                                                                                                                                                                                                     |     |
| 38 |                                             |                      |                                                                                                                                                                                                                                                                                     |     |
| 39 |                                             |                      |                                                                                                                                                                                                                                                                                     |     |

40 The SPIRIT checklist is distributed under the terms of the Creative Commons Attribution License CC-BY-ND  
 41 3.0. This checklist was completed on 19. August 2019 using <https://www.goodreports.org/>, a tool made by the  
 42 [EQUATOR Network](#) in collaboration with [Penelope.ai](#)  
 43  
 44  
 45  
 46  
 47  
 48  
 49  
 50  
 51  
 52  
 53  
 54  
 55  
 56  
 57  
 58  
 59  
 60

# BMJ Open

## Acupuncture for Insomnia with Short Sleep Duration: Protocol for a Randomized Controlled Trial

|                                 |                                                                                                                                                                                                                                                                                                                                                                                                                                                                                                                                                                                                                                                                                                                                                                                                                                                                                                                                                                                                                                                                                                                                                                                                                                                                                                                                                                                                                                                                                                                                                                                                                                                                                                                                                                                |
|---------------------------------|--------------------------------------------------------------------------------------------------------------------------------------------------------------------------------------------------------------------------------------------------------------------------------------------------------------------------------------------------------------------------------------------------------------------------------------------------------------------------------------------------------------------------------------------------------------------------------------------------------------------------------------------------------------------------------------------------------------------------------------------------------------------------------------------------------------------------------------------------------------------------------------------------------------------------------------------------------------------------------------------------------------------------------------------------------------------------------------------------------------------------------------------------------------------------------------------------------------------------------------------------------------------------------------------------------------------------------------------------------------------------------------------------------------------------------------------------------------------------------------------------------------------------------------------------------------------------------------------------------------------------------------------------------------------------------------------------------------------------------------------------------------------------------|
| Journal:                        | <i>BMJ Open</i>                                                                                                                                                                                                                                                                                                                                                                                                                                                                                                                                                                                                                                                                                                                                                                                                                                                                                                                                                                                                                                                                                                                                                                                                                                                                                                                                                                                                                                                                                                                                                                                                                                                                                                                                                                |
| Manuscript ID                   | bmjopen-2019-033731.R1                                                                                                                                                                                                                                                                                                                                                                                                                                                                                                                                                                                                                                                                                                                                                                                                                                                                                                                                                                                                                                                                                                                                                                                                                                                                                                                                                                                                                                                                                                                                                                                                                                                                                                                                                         |
| Article Type:                   | Protocol                                                                                                                                                                                                                                                                                                                                                                                                                                                                                                                                                                                                                                                                                                                                                                                                                                                                                                                                                                                                                                                                                                                                                                                                                                                                                                                                                                                                                                                                                                                                                                                                                                                                                                                                                                       |
| Date Submitted by the Author:   | 02-Oct-2019                                                                                                                                                                                                                                                                                                                                                                                                                                                                                                                                                                                                                                                                                                                                                                                                                                                                                                                                                                                                                                                                                                                                                                                                                                                                                                                                                                                                                                                                                                                                                                                                                                                                                                                                                                    |
| Complete List of Authors:       | <p>Wang, Cong; Yueyang Hospital of Integrated Traditional Chinese and Western Medicine, Shanghai University of Traditional Chinese Medicine, Shanghai, China, Department of Acupuncture and Moxibustion</p> <p>Yang, Wen-jia ; Yueyang Hospital of Integrated Traditional Chinese and Western Medicine, Shanghai University of Traditional Chinese Medicine, Department of Acupuncture and Moxibustion,</p> <p>Yu, Xin-tong ; Yueyang Hospital of Integrated Traditional Chinese and Western Medicine, Shanghai University of Traditional Chinese Medicine, Laboratory Center of Medicine</p> <p>Fu, Cong; Yueyang Hospital of Integrated Traditional Chinese and Western Medicine, Shanghai University of Traditional Chinese Medicine, Department of Acupuncture and Moxibustion</p> <p>Li, Jin-jin ; Yueyang Hospital of Integrated Traditional Chinese and Western Medicine, Shanghai University of Traditional Chinese Medicine, Department of Acupuncture and Moxibustion</p> <p>Wang, Jing ; Yueyang Hospital of Integrated Traditional Chinese and Western Medicine, Shanghai University of Traditional Chinese Medicine, Department of Acupuncture and Moxibustion</p> <p>Xu, Wen-lin ; Yueyang Hospital of Integrated Traditional Chinese and Western Medicine, Shanghai University of Traditional Chinese Medicine, Department of Acupuncture and Moxibustion</p> <p>Zheng, Yi-xin ; Yueyang Hospital of Integrated Traditional Chinese and Western Medicine, Shanghai University of Traditional Chinese Medicine, , Department of Acupuncture and Moxibustion</p> <p>Chen, Yun-fei ; Yueyang Hospital of Integrated Traditional Chinese and Western Medicine, Shanghai University of Traditional Chinese Medicine, , Department of Acupuncture and Moxibustion</p> |
| <b>Primary Subject Heading</b>: | Complementary medicine                                                                                                                                                                                                                                                                                                                                                                                                                                                                                                                                                                                                                                                                                                                                                                                                                                                                                                                                                                                                                                                                                                                                                                                                                                                                                                                                                                                                                                                                                                                                                                                                                                                                                                                                                         |
| Secondary Subject Heading:      | Complementary medicine                                                                                                                                                                                                                                                                                                                                                                                                                                                                                                                                                                                                                                                                                                                                                                                                                                                                                                                                                                                                                                                                                                                                                                                                                                                                                                                                                                                                                                                                                                                                                                                                                                                                                                                                                         |
| Keywords:                       | Acupuncture, Insomnia, Short Sleep Duration, Randomized controlled trial, Protocol, Protocols & guidelines < HEALTH SERVICES ADMINISTRATION & MANAGEMENT                                                                                                                                                                                                                                                                                                                                                                                                                                                                                                                                                                                                                                                                                                                                                                                                                                                                                                                                                                                                                                                                                                                                                                                                                                                                                                                                                                                                                                                                                                                                                                                                                       |
|                                 |                                                                                                                                                                                                                                                                                                                                                                                                                                                                                                                                                                                                                                                                                                                                                                                                                                                                                                                                                                                                                                                                                                                                                                                                                                                                                                                                                                                                                                                                                                                                                                                                                                                                                                                                                                                |

1  
2  
3  
4  
5  
6  
7  
8  
9  
10  
11  
12  
13  
14  
15  
16  
17  
18  
19  
20  
21  
22  
23  
24  
25  
26  
27  
28  
29  
30  
31  
32  
33  
34  
35  
36  
37  
38  
39  
40  
41  
42  
43  
44  
45  
46  
47  
48  
49  
50  
51  
52  
53  
54  
55  
56  
57  
58  
59  
60

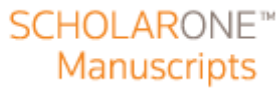



I, the Submitting Author has the right to grant and does grant on behalf of all authors of the Work (as defined in the below author licence), an exclusive licence and/or a non-exclusive licence for contributions from authors who are: i) UK Crown employees; ii) where BMJ has agreed a CC-BY licence shall apply, and/or iii) in accordance with the terms applicable for US Federal Government officers or employees acting as part of their official duties; on a worldwide, perpetual, irrevocable, royalty-free basis to BMJ Publishing Group Ltd ("BMJ") its licensees and where the relevant Journal is co-owned by BMJ to the co-owners of the Journal, to publish the Work in this journal and any other BMJ products and to exploit all rights, as set out in our [licence](#).

The Submitting Author accepts and understands that any supply made under these terms is made by BMJ to the Submitting Author unless you are acting as an employee on behalf of your employer or a postgraduate student of an affiliated institution which is paying any applicable article publishing charge ("APC") for Open Access articles. Where the Submitting Author wishes to make the Work available on an Open Access basis (and intends to pay the relevant APC), the terms of reuse of such Open Access shall be governed by a Creative Commons licence – details of these licences and which [Creative Commons](#) licence will apply to this Work are set out in our licence referred to above.

Other than as permitted in any relevant BMJ Author's Self Archiving Policies, I confirm this Work has not been accepted for publication elsewhere, is not being considered for publication elsewhere and does not duplicate material already published. I confirm all authors consent to publication of this Work and authorise the granting of this licence.

# Acupuncture for Insomnia with Short Sleep Duration: Protocol for a Randomized Controlled Trial

Cong Wang<sup>1</sup>; Wen-jia Yang<sup>1</sup>; Xin-tong Yu<sup>2</sup>; Cong Fu<sup>1</sup>; Jin-jin Li<sup>1</sup>; Jing Wang<sup>1</sup>;  
Wen-lin Xu<sup>1</sup>; Yi-xin Zheng<sup>1</sup>; Yun-fei Chen<sup>1\*</sup>

1. Department of Acupuncture and Moxibustion, Yueyang Hospital of Integrated Traditional Chinese and Western Medicine, Shanghai University of Traditional Chinese Medicine, Shanghai, China;
2. Laboratory Center of Medicine, Yueyang Hospital of Integrated Traditional Chinese and Western Medicine, Shanghai University of Traditional Chinese Medicine, Shanghai, China;

Address correspondence to: Yun-fei Chen, Yueyang Hospital of Integrated Traditional Chinese and Western Medicine, Shanghai University of Traditional Chinese Medicine, No.110 Ganhe Road, Hongkou District, Shanghai 200437, China. Telephone: 86-021-65162628. Fax: 86-021-65162628; Email: icyf1968@163.com

## Abstract

**Introduction:** Insomnia with short sleep duration has a more serious negative impact on patient health. The existing literature suggests that medication therapy is more effective for this phenotype of insomnia compared to cognitive behavioural therapy (CBT). However, the potential side effects of hypnotic medications hinder their clinical application. Acupuncture has been widely used in the treatment of insomnia, but it remains unclear whether it has therapeutic efficacy for insomnia with short sleep duration. The purpose of this trial is to evaluate the efficacy and safety of acupuncture for insomnia with short sleep duration.

**Methods and analysis:** This study is designed as a randomized, single centre, single-blinded, placebo acupuncture controlled trial involving 152 participants. Eligible patients will be divided into two groups according to the objective total sleep time: insomnia with normal sleep duration group and insomnia with short sleep duration group. Then, patients in each group will be randomly assigned to two subgroups, the treatment group (acupuncture) and the control group (placebo acupuncture), in a 1:1

ratio with 38 subjects in each subgroup. The primary outcome is the Pittsburgh Sleep Quality Index (PSQI) and the Insomnia Severity Index (ISI). Secondary outcomes are actigraphy (ACT), the Beck Anxiety Inventory (BAI), the Beck Depression Inventory (BDI) and the Fatigue Severity Scale (FSS). All adverse effects will be assessed by the Treatment Emergent Symptom Scale. Outcomes will be evaluated at baseline, post-treatment, as well as at 1-week and 1-month follow-up.

**Ethics and dissemination:** This protocol has been approved by the ethics committee of Yueyang Hospital of Integrated Traditional Chinese and Western Medicine (No.: 2019-17). Written informed consent will be obtained from all participants. The results will be disseminated through peer-reviewed journals for publications.

**Registration:** ChiCTR1900023473; Pre-results.

**Keywords** Acupuncture; Insomnia; Short Sleep Duration; Randomized controlled trial; Protocol.

## Article Summary

### Strengths and limitations of this study

1. A randomized, single centre, placebo acupuncture controlled trial with a 2×2 factorial design.
2. The first trial to study the efficacy and safety of acupuncture for insomnia with short sleep duration.
3. Participants will be screened for insomnia at baseline by polysomnography (PSG).
4. Sleep indicators in the actigraphy (ACT) will be used as objective outcomes of patients' sleep quality.
5. One limitation is that this study is implemented in only one center in Chinese subjects and without long-term treatment and follow-up.

## 1. Introduction

In recent years, the incidence of chronic insomnia in adults has become higher <sup>[1]</sup>, and short sleepers are also showing an increasing trend <sup>[2]</sup>. Studies have found that patients with insomnia accompanied by short sleep duration can cause many chronic diseases, such as obesity, diabetes, cardiovascular disease, chronic kidney disease, and hypertension <sup>[3-7]</sup>, and may even result in inadequate hydration <sup>[8]</sup>. Similarly, insomnia patients with short sleep duration will have many adverse effects on their health. Some researchers have found that the mortality rate of insomnia patients is three times more than that of people without insomnia. When patients with insomnia have short sleep duration, the damage to their health will be more serious and the mortality rate will be higher <sup>[9]</sup>.

Based on this, Vgontzas <sup>[10]</sup> proposed that insomnia can be divided into two phenotypes based on objective sleep duration, with the threshold of the total sleep time being 6 h. The first phenotype (short objective sleep duration) is characterized by physiological hyperarousal with numerous medical complications. The second phenotype (normal sleep duration) is characterized by cognitive-emotional disorders, accompanied by a process of cortical excitement and remitting course. Vgontzas also suggested that insomnia with short sleep duration may be less sensitive to CBT-I therapy. Although many guidelines of sleep disorders recommend CBT-I as the primary treatment <sup>[11-13]</sup>, Bathgate et al conducted a trial and concluded that insomnia with short sleep duration has a dull response to CBT-I therapy <sup>[14]</sup>. The short objective sleep duration phenotype (characterized by physiological hyperarousal) has a dull response to CBT-I because of behaviourally based approach aimed at decreasing cognitive-emotional arousal, altering unhealthy sleep-related behaviours and beliefs and changing sleep misperceptions <sup>[15]</sup>. It's different from the pathological mechanism of this phenotype. But it will respond better to biologically based treatments, since selected medications aim to reduce physiological hyperarousal and increase sleep duration <sup>[16]</sup>.

Because insomnia with short sleep duration has a dull response to CBT-I treatment, these patients prefer to take sleep medicine. However, there are many side effects to



1  
2  
3  
4 benzodiazepine receptor agonists, such as hangover effects, cognitive impairment, and  
5 drug addiction [17-18]. Therefore, many people with insomnia seek complementary and  
6 alternative medicine, such as acupuncture [19]. Acupuncture has been widely used in the  
7 treatment of insomnia, and studies have shown that it can improve sleep efficiency,  
8 daytime functioning, psychological health and sleep quality of insomnia subjects [20-21].  
9 Our previous research also showed that acupuncture has a good short-term effect on  
10 perimenopausal insomnia [22]. An earlier Cochrane review showed that acupuncture can  
11 improve the sleep quality of insomnia subjects compared with untreated groups and  
12 placebo acupuncture groups [23].

21 According to the theory of TCM, the main causes of insomnia are Yin deficiency  
22 leading to excessive fire, incoordination between the heart and the kidney, disturbance  
23 of heart due to phlegm heat and so on [24]. Therefore, we chose acupoints based on  
24 disease differentiation and special acupoints combinations to nourish Yin and drain fire,  
25 calm the mind and regulate mentality. SP 6 (Sanyinjiao) and HT 7 (Shenmen) are  
26 adopted as the main points to nourish Yin and drain fire, especially used to nourish liver  
27 and kidney Yin and decrease heart fire [25]. PC 6 (Neiguan) is the collateral point of the  
28 hand-jueyin pericardium meridian, which is also specific acupuncture point of the eight  
29 confluent points. It's used to cool pericardium and restore consciousness [26]. We also  
30 use GV20 (Baihui) and Ex-HN 1 (Sishencong) to make the brain-activating and mind-  
31 tranquilizing [27].

42 This is the first rigorous randomized controlled clinical trial to study the therapeutic  
43 effect of acupuncture on insomnia with short sleep duration and compare the effects on  
44 different insomnia phenotypes. Our objectives are as follows: (1) In randomized  
45 controlled trials with a 2×2 factorial design, we will study whether the clinical effect of  
46 acupuncture on chronic insomnia is related to insomnia phenotypes or acupoint effects  
47 and will evaluate both subjective and objective parameters. (2) We will explore the  
48 clinical symptomatic manifestations (difficulty in falling asleep, early awakening,  
49 difficulty in maintaining sleep, etc.) and psychological characteristics (anxiety,  
50 depression, sensitivity, etc.) and analyse the acupuncture effect for these symptoms of  
51 insomnia with short sleep duration.

## 2. Methods

### 2.1. Study design

This study is a randomized controlled trial with a single-centre, single-blind, 2×2 factorial design and will be completed in Yueyang Hospital of Integrated Traditional Chinese and Western Medicine affiliated with Shanghai University of Traditional Chinese Medicine. The study period will be from November 2019 to April 2021, and the Shanghai Municipal Commission of Health and Family Planning will be the management organization of the study.

Insomnia subjects who meet the inclusion criteria will be divided into two groups according to the objective total sleep time (TST): insomnia with a short sleep duration group (objective sleep time < 6 h) and insomnia with a normal sleep duration group (objective sleep time ≥ 6 h). A total of 76 subjects will be recruited from each group. Each group will be randomly assigned to the acupuncture subgroup and the placebo acupuncture subgroup at a 1:1 ratio. The aim of this study is to evaluate the short-term efficacy of acupuncture for the treatment of insomnia with short sleep duration. According to our previous research, each subject will experience screening, treatment and a follow-up period of approximately 8 weeks.

All subjects will complete the following scales [28]: The Pittsburgh Sleep Quality Index (PSQI) [29] and the Insomnia Severity Index (ISI) [30-31] will evaluate subjects' subjective sleep improvement. Subjects will be assessed for the objective total sleep time by actigraphy [32] in conjunction with a sleep diary [33]. Subjects' mood improvement will be evaluated by the Beck Anxiety Inventory (BAI) [34] and the Beck Depression Inventory (BDI) [35]. The Fatigue Severity Scale (FSS) [36] will be used to assess the improvement in fatigue. The above scales or actigraphy will be evaluated during the screening period and after the treatment at one-week and one-month follow-ups (Figure 1). PSG (NIHON KOHDEN, Japan) in this study will be used for screening purposes only. Subjects will sign the informed consent form after enrolment.

## 2.2. Participants

The study will include 152 insomnia participants. We plan to recruit participants in multiple ways, and the recruitment location will be restricted to Yueyang Hospital of Integrated Traditional Chinese and Western Medicine affiliated with Shanghai University of Traditional Chinese Medicine, Shanghai, China. Our hospital is a comprehensive tertiary hospital with clinical treatment, scientific research and teaching practice. The main source of the subjects will be the outpatients who meet our criteria. In addition, we will also recruit participants through newspapers, social media and advertising. The time limit will be from November 2019 to April 2021. The site of our clinical trial will be the Insomnia Diagnosis and Treatment Center of the Acupuncture and Moxibustion Department at Yueyang Hospital of Integrated Traditional Chinese and Western Medicine affiliated with Shanghai University of Traditional Chinese Medicine. All participants who are willing to participate in the trial will be required to call our research coordinator and arrange an outpatient interview on the first available date.

### 2.2.1. Inclusion criteria

The outpatient interview will be conducted in the form of a semi-structured interview questionnaire, which will contain the cause of insomnia, onset process, treatment process, main sleep complaints, bedtime status, sleep-wake cycle, other sleep-related symptoms, daytime symptoms, mental state, etc. [37]. The inclusion criteria have been developed based on the diagnostic criteria for chronic insomnia in the International Classification of Sleep Disorders (Third Edition) (ICSD-3) [38] developed by the American Academy of Sleep Medicine in 2014. The inclusion criteria are as follows:

- (1) Between 18 and 65 years of age;
- (2) Compliance with the diagnostic criteria for chronic insomnia in ICSD-3;
- (3) Stable administration of sedative-hypnotic drugs for more than 3 months before entering the study or not taking such drugs;
- (4) Meet all of the following: PSQI [29] > 5 points, ISI [30-31] > 14 points, BAI [34] < 45 points and BDI [35] ≤ 28 points;
- (5) Never received acupuncture treatment;

1  
2  
3  
4 (6) Voluntarily participated in the study and signed informed consent.

5  
6 In addition, all participants will complete a one-week sleep actigraphy and diary to  
7 determine their sleep patterns and objective sleep duration before enrolment [39]. We  
8 will recruit 76 subjects in each group (insomnia with short sleep duration and insomnia  
9 with normal sleep duration). If one group completes recruitment first, that specific  
10 group will stop recruiting.  
11  
12  
13  
14

### 15 **2.2.2. Exclusion criteria**

16  
17 The exclusion criteria are as follows:

- 18  
19 (1) Severe hepatic and renal function damage, as well as haematologic diseases and  
20 respiratory diseases and diagnosis of mental disorders according to the Diagnostic  
21 and Statistical Manual of Mental Disorders (DSM-V) [40];  
22  
23 (2) Semi-structured clinical interviews determine subjects have other sleep disorders  
24 rather than primary insomnia;  
25  
26 (3) Infectious diseases such as infectious hepatitis, tuberculosis, AIDS, and syphilis;  
27  
28 (4) Severe digestive system diseases and severe malnutrition;  
29  
30 (5) Pregnant or lactating;  
31  
32 (6) Severe trauma with no cure or not suitable for acupuncture, such as allergic  
33 constitution and severe dermatosis;  
34  
35 (7) An apnoea–hypopnea index (AHI) >10 or periodic limb movements index during  
36 sleep associated with >15 arousals per hour on diagnostic PSG [41];  
37  
38 (8) Participated in other clinical trials in the last 3 months.  
39  
40  
41  
42  
43  
44  
45  
46

### 47 **2.3. Interventions**

48  
49 The acupuncturist for this study has received a master's degree in acupuncture and  
50 tuina at Shanghai University of Traditional Chinese Medicine, has 8 years of training  
51 experience, has obtained a doctor qualification certificate, and has 3 years of clinical  
52 work experience. All study participants will receive 10 days of training prior to the start  
53 of the trial to become more familiar with the process.  
54  
55  
56  
57

58  
59 The subjects in the acupuncture group will be placed in the supine position. We have  
60 selected 5 acupoints for this study: GV20 (Baihui), PC 6 (Neiguan), SP 6 (Sanyinjiao),

1  
2  
3  
4 HT 7 (Shenmen) and Ex-HN 1 (Sishencong). The reason for choosing these acupoints  
5 is the previous systematic review [42-43] and our clinical experience. A disposable sterile  
6 stainless steel acupuncture needle with a length of 40 mm and a diameter of 0.25 mm  
7 will be used (Andy, Guizhou, China). The acupuncturist will take the points on both  
8 sides of the body. The needle will be inserted into the skin to a depth of 10-20 mm,  
9 which is determined by the acupuncturist according to body type (high or short, fat or  
10 thin). After piercing, a thrusting and twirling of the needle will be performed to induce  
11 the sensation of “De qi”, and the needle will be left for 20 minutes [44]. “De qi” means  
12 that after the needle has penetrated into the acupoint to a certain depth, the needle is  
13 thrust and twirled to cause the acupoint to obtain the induction of meridian qi. The  
14 subjects will have a self-conscious reaction such as soreness, heaviness or distention.  
15 This is the key process in acupuncture treatment [45].

16  
17  
18  
19  
20  
21  
22  
23  
24  
25  
26  
27  
28  
29  
30  
31  
32  
33  
34  
35  
36  
37  
38  
39  
40  
41  
42  
43  
44  
45  
46  
47  
48  
49  
50  
51  
52  
53  
54  
55  
56  
57  
58  
59  
60  
Subjects who entered the control group will receive a placebo acupuncture treatment  
by using a non-invasive placebo needle [46] with the same acupoints as the treatment  
group. The Streitberger needle has been widely used in clinical research on placebo  
acupuncture treatment of insomnia [22,47-48], and studies have shown that using this  
needle in a placebo acupuncture group is reliable for the Chinese population [49]. Since  
the Streitberger needles will be in place for 20min, they will need to be firmly affixed  
to the skin or scalp. We have modified the procedure by using surgical tape (or hairpins  
in hairy regions) to hold the needles in place. This enables the needles to be applied in  
hairy regions and different needling directions to be attempted. Such a method has been  
adopted by many other researchers [50].

Subjects from both the treatment group and the control group will be treated  
equally by the physician to prevent them from perceiving the difference. They will be  
informed about the acupuncture as follows: “In this study, different types of  
acupuncture treatment will be compared. One type is the usual acupuncture, and the  
other is associated with positive outcomes in previous clinical studies [51].” And subjects  
in both groups will be treated three times per week for 10 times by the same  
acupuncturist.

## 2.4. Outcome measures

### 2.4.1. Primary outcome measures

Because PSQI and ISI can evaluate global sleep and insomnia symptoms, many guidelines recommend both as an essential indicator for measuring and reporting about insomnia symptoms [28] [52]. And PSQI was verified as a reliable and valid measure of subjective sleep quality in clinical practice and experimental research [53-54]. At the same time, combined with our previous research results, the primary outcome of this study will be the changes in the PSQI and ISI between the baseline, post-treatment assessment, one-week follow-up and one-month follow-up (Table 1). And PSQI will be used for sample size calculations.

The PSQI consists of 19 self-evaluation items and 5 other evaluation items. The self-assessment items assess sleep quality, fall asleep time, total sleep time, sleep efficiency, concomitant symptoms, hypnotic drugs, and daytime functions. The total score is 0-21 points. Higher scores indicate worse sleep quality and more severe sleep disorders [29]. The PSQI is widely used in the clinic to assess sleep dysfunction [55], and it is more likely to assess an individual's sleep state on weekdays [56]. A total score > 5 indicates a need for clinical treatment [57]. The Chinese version of the PSQI has a high degree of reliability and validity for the Chinese population and can be used as an effective tool for sleep screening and evaluation in clinical and scientific research [58-59].

The ISI mainly evaluates the insomnia nature, insomnia severity, and effects of daytime function on patients. The scale is simple and easy to implement. It consists of 7 evaluation items with a total score of 0-28. The higher the score, the more serious the degree of insomnia [31]. It is mainly used for the screening of patients with insomnia and the evaluation of a therapeutic effect in clinical studies [60]. A total score of 8-14 indicates subclinical insomnia, and a total score > 14 indicates clinical insomnia. A change score of -8.4 points is associated with moderate improvement as rated by an independent assessor after treatment in the clinical sample [31, 61]. The Chinese version of the ISI is used in China's population assessment for insomnia with high reliability and validity [62].

### 2.4.2. Secondary outcome measures

1  
2  
3  
4 The secondary outcome measures consist of (1) changes in the number of  
5 awakenings (NOA), total wake time (TWT), total sleep time (TST), and sleep efficiency  
6 (SE) measured by actigraphy before and after treatment; (2) changes in BAI, BDI, and  
7 FSS scores after treatment and during follow-up compared with before treatment; (3)  
8 changes in sleep onset latency (SOL), total wake time (TWT), total sleep time (TST),  
9 sleep efficiency (SE), and middle of the night wake after sleep onset (MWASO) from  
10 the sleep diary after treatment compared with those before treatment (Table 1).  
11  
12  
13  
14  
15  
16

17 ACT evaluates the body state by measuring the body movement by wearing a motion  
18 sensor on the non-dominant wrist. It can be used as one of the objective indicators for  
19 evaluating sleep-wake state [32]. The motion watch 8 wrist ACT produced by CamNtech  
20 Ltd will be used in this study. Its acceleration sensitivity is <0.01 g, with 5 s as the  
21 analysis unit. The recorded sleep and activity data will be analysed by the  
22 corresponding MotionWare Software. The main parameters include sleep-wake  
23 parameters and rest-activity parameters. It can satisfactorily evaluate the four sleep  
24 indicators: number of awakenings, wake time after sleep onset, total sleep time, and  
25 sleep efficiency percentage [63]. Early studies have shown that ACT has a good fit to  
26 polysomnography (PSG) in assessing sleep and wakefulness ( $R_s = 0.52-0.71$ ) and has  
27 a good sensitivity as an index of effect evaluation in insomnia treatment [64-65]. In this  
28 study, we will use ACT combined with a sleep diary [33] to record the sleep of the  
29 subjects for one continuous week. Changes in the number of awakenings (NOA), total  
30 wake time (TWT), total sleep time (TST), and sleep efficiency (SE) will be measured  
31 before and after treatment.  
32  
33  
34  
35  
36  
37  
38  
39  
40  
41  
42  
43  
44  
45

46 The BAI, which was developed by Beck in 1988 [66], contains a total of 21 different  
47 anxiety symptom items. It is used to evaluate the anxiety state of a subject in the past  
48 week. The higher the score, the more serious the degree of anxiety. Generally,  $BAI \geq$   
49 45 is used as the criterion for positive anxiety. The scale is simple in content, easy in  
50 operation, and clear in understanding. The Chinese version has good reliability and  
51 validity. It is a commonly used measurement tool for anxiety symptom assessment in  
52 the Chinese population [67].  
53  
54  
55  
56  
57  
58  
59

60 The BDI is based on the diagnostic criteria for depression in the fourth edition of the

1  
2  
3  
4 Diagnostic and Statistical Manual of Mental Disorders. The first version was published  
5 in 1961 and revised to the current version by Beck et al. The scale has a total of 21  
6 items that are used to evaluate the severity of a subject's depression over the past week.  
7  
8 The higher the total score is, the more severe the depression. A total score of 0-13 is  
9 known as no depression, 14-19 as mild depression, 20-28 as moderate depression and  
10 29-63 as major depression. The Chinese version has been tested and proven to have  
11 good reliability and validity [68].  
12  
13  
14  
15  
16

17 The FSS [36] was formulated by Krupp in 1989. The scale has a total of 9 items and  
18 is simple and easy to perform. A higher score indicates more severe fatigue. In insomnia  
19 patients, the FSS threshold is 5.5 points, and a high score represents the impaired  
20 daytime functional status of insomnia patients [69]. The Chinese version of this scale has  
21 been determined to have good reliability and validity [70].  
22  
23  
24  
25  
26

### 27 **2.4.3. Safety assessments**

28  
29 Safety will be assessed by routine blood test, renal function test and liver function  
30 test. These indicators are detected during the period of screening and after the treatment.  
31 We will still count the events during the trial through a list of adverse events. We will  
32 specifically evaluate them during the assessment phase [71] (Table 1). Adverse events  
33 will be defined as any adverse medical reactions that occurred from the time the subject  
34 signed the informed consent form to the time of the last follow-up, whether or not there  
35 is a causal relationship with the study treatment. Subjects are required to fill in the list  
36 of adverse events, which should record the time point, severity, measures taken,  
37 whether they are related to the treatment and prognosis. During the assessment phase,  
38 researchers will assess the possible relationship between adverse events and the study,  
39 as well as the combined medications. Adverse events include all adverse reactions that  
40 are definitely related to treatment, most likely related to treatment and likely related to  
41 treatment.  
42  
43  
44  
45  
46  
47  
48  
49  
50  
51  
52  
53  
54  
55  
56  
57  
58  
59  
60



| Week                                      | 0        | 1               | 2 | 3 | 4               | 8 |
|-------------------------------------------|----------|-----------------|---|---|-----------------|---|
|                                           | Baseline | Treatment phase |   |   | Follow-up phase |   |
| PATIENTS                                  |          |                 |   |   |                 |   |
| Telephone reservation                     | ×        |                 |   |   |                 |   |
| Enrolment                                 | ×        |                 |   |   |                 |   |
| Sign informed consent                     | ×        |                 |   |   |                 |   |
| Clinical interview                        | ×        |                 |   |   |                 |   |
| Sleep scales                              | ×        |                 |   |   |                 |   |
| Physical examination                      | ×        |                 |   |   | ×               |   |
| Laboratory test                           | ×        |                 |   |   | ×               |   |
| PSG                                       | ×        |                 |   |   |                 |   |
| GROUPS                                    |          |                 |   |   |                 |   |
| Acupuncture group (normal sleep duration) |          |                 |   |   | Ten treatments  |   |
| Control group (normal sleep duration)     |          |                 |   |   | Ten treatments  |   |
| Acupuncture group (short sleep duration)  |          |                 |   |   | Ten treatments  |   |
| Control group (short sleep duration)      |          |                 |   |   | Ten treatments  |   |
| OUTCOME MEASUREMENT                       |          |                 |   |   |                 |   |
| PSQI                                      | ×        |                 |   |   | ×               | × |
| ISI                                       | ×        |                 |   |   | ×               | × |
| ACT                                       | ×        |                 |   |   | ×               |   |
| BAI                                       | ×        |                 |   |   | ×               |   |
| BDI                                       | ×        |                 |   |   | ×               |   |
| FSS                                       | ×        |                 |   |   | ×               |   |
| Sleep diary                               | ×        | ×               | × | × | ×               |   |
| Success of subject-blinding test          |          |                 |   |   | ×               |   |
| Adverse events                            |          |                 |   |   |                 |   |
| Reasons for dropouts or withdrawals       |          | ×               | × | × | ×               | × |
| Patient's compliance                      |          |                 |   |   | ×               | × |

Note:

ACT: Actigraphy

BAI: Beck Anxiety Inventory

BDI: Beck Depression Inventory

FSS: Fatigue Severity Scale

ISI: Insomnia Severity Index

PSG: Polysomnography

PSQI: Pittsburgh Sleep Quality Index

Table 1. Trial processes chart

## 2.5. Sample size

According to previous literature [22], placebo acupuncture reduced the PSQI of chronic insomnia to 14.76 after treatment, and the standard deviation was 3.35. We hypothesize that the true acupuncture in our study could reduce the PSQI score by 2.2 points compared with the placebo acupuncture, and the standard deviation of 2.93 was taken from the previous research results. According to the needs of this study, we made  $\alpha=0.05$  and  $1-\beta=0.90$ , according to the formula [72]:

$$n = \psi^2 (\sum S_i^2 / g) / [\sum (\bar{X}_i - \bar{X})^2 / (g - 1)]$$

$\bar{X}_1=12.56$ ,  $S_1=2.93$ ,  $\bar{X}_2=14.76$ ,  $S_2=3.35$ ,  $\bar{X}_3=12.56$ ,  $S_3=2.93$ ,  $\bar{X}_4=14.76$ ,  $S_4=3.35$ , and  $\bar{X}=13.66$ ; by looking up the table,  $\psi=2.17$ . Calculating the sample size of each group:  $n=30.92 \approx 31$ ; considering the loss factor (according to a 20% loss rate), the number of samples in each group is 38 cases, and the total number of samples in the 4 subgroups is 152 cases.

## 2.6. Randomization and blinding

The statistician outside the study will use SPSS 25.0 to generate two different sets of random numbers lists with 76 numbers in each. The random numbers in each list will be arranged in ascending order, with No. 1-38 for the control group and 39-76 for the acupuncture group. Subjects will enter the control group or the acupuncture group according to the random numbers corresponding to the order of signing the informed consent in a ratio of 1:1.

Random numbers and treatment protocols will be printed on the subject's treatment card and placed in an opaque envelope by an independent investigator. Each enrolled subject will be assigned to an order number and receive an envelope with their name on it. The acupuncturist will check whether the envelope was sealed and will open and remove the treatment card. During the trial, the generation of a random numbers list, subjects' recruitment, acupuncture treatment, outcome measures assessment, and follow-up will be performed independently by different researchers. Only the outside assistant and the acupuncturist will be aware of the allocation. Participants and other

1  
2  
3  
4 relevant researchers will be blinded to the allocation.

5 The success of subject-blinding will be assessed by, at the end of the last treatment  
6 session, asking the subject if they believe they are receiving active treatment.  
7  
8  
9

## 10 11 **2.7 Data Collection and Management**

12  
13 Data will be collected at the baseline (one week before the first intervention), post  
14 intervention (at the end of intervention), one-week follow-up and one-month follow-  
15 up. Each visit will comprise three assessments: (1) subjects will complete sleep-related  
16 questionnaires independently in a private conference room at Yueyang Hospital of  
17 Integrated Traditional Chinese and Western Medicine, Shanghai University of  
18 Traditional Chinese Medicine. Completion of the questionnaires will require  
19 approximately 30 min; during this time, outcomes assessors will be available to answer  
20 questions; (2) subjects will complete a sleep diary at home under the guidance of  
21 outcome assessors; (3) subjects will undergo one-night PSG at the baseline, ACT before  
22 and after the intervention. Outcome assessors will be trained to promote participant  
23 retention, collect good quality data and complete follow-up. Data analysts will be  
24 trained on data entry, coding, security and storage. Statisticians in the research team  
25 will provide training on data assessment and analysis. Maintenance of participant  
26 confidentiality will be involved: (1) asking subjects only share personal and study-  
27 related information during our study; (2) storing data in the password-protected files on  
28 a designated specific computer with restricted access; (3) only the research-related  
29 person have access to personal identifiable information, which will be destroyed once  
30 the study is completed. Technical appendix, statistical code, and dataset available from  
31 the ResMan ([www.medresman.org](http://www.medresman.org)).  
32  
33  
34  
35  
36  
37  
38  
39  
40  
41  
42  
43  
44  
45  
46  
47  
48  
49

50 Subjects may withdraw from the study at any time for any reason. If any subject  
51 wishes to withdraw, the clinician will ask if they are willing to complete the final  
52 assessment and record the time of the last treatment. The incidence of withdrawal and  
53 loss to follow-up will be recorded and reported. We will also inquire the subjects about  
54 the reasons for absence, and will record compliance by the clinician.  
55  
56  
57  
58  
59  
60

## 2.8 Statistics and Analysis

The statistics and analysis of all data will be performed by two analytical researchers independent of the trial. Intention-to-treat (ITT) and per-protocol (PP) analysis will be used as evaluation methods to evaluate the final results of this study. Among them, ITT analysis will be used as the main analytical method. The multiple imputation method will be the primary method for processing the missing data, and an observation carried forward method will also apply to sensitivity analysis [73]. Data from dropout cases will be managed by both ITT analysis and PP analysis.

SPSS 25.0 will be used for statistical analysis. For the measurement data that conform to the normal distribution and homogeneous variance, the mean  $\pm$  standard deviation will be used to describe the discrete tendency and central tendency. The comparison between the two groups will be performed by independent-samples t test. The comparison of multiple time points will be based on repeated measurement data combined with multivariate analysis of variance. Measurement data that do not conform to the normal distribution will be described by median, minimum, and maximum. The Mann-Whitney U rank sum test will be used for comparison between the two groups. The intra-group comparison will be based on the Friedman(F) rank sum test of the relevant samples.

The enumeration data will be expressed by frequency and constituent ratio. If the analysis index is two-category and multi-category unordered data, the comparison between groups will be performed by  $\chi^2$  test. If the analysis index is hierarchical order enumeration data, the Mann-Whitney U rank sum test will be used for the intra-group comparison.

All statistical tests will be performed on a two-sided test, and  $P \leq 0.05$  will be considered statistically significant.

## 3. Discussion

Some scholars have suggested that insomnia can be divided into two phenotypes

1  
2  
3  
4 based on objective sleep duration, namely, insomnia with short sleep duration and with  
5 normal sleep duration. The former is an important phenotype of insomnia and has more  
6 serious health hazards [3-9]. At present, the treatment of insomnia tends to be biologically  
7 based (represented by benzodiazepine receptor agonists) and behaviourally based  
8 (represented by CBT-I). Most of the diagnosis and treatment guidelines of sleep  
9 disorders recommend CBT-I as the primary choice for treatment of insomnia and drug  
10 therapy as the secondary choice [11-13]. However, studies have shown that patients with  
11 insomnia with a short sleep duration are not sensitive to CBT-I treatment [14], these  
12 patients prefer to take sleep medicine. However, drug therapy has many adverse  
13 reactions, such as hangover effects, cognitive impairment and drug addiction [17-18]. It  
14 is important to seek safe and effective complementary and alternative medicine with  
15 few side effects. This is the basis of our research. Acupuncture treatment for insomnia  
16 provides such an opportunity.

17  
18  
19  
20  
21  
22  
23  
24  
25  
26  
27  
28  
29 In this study, our first purpose is to determine whether acupuncture has a therapeutic  
30 effect on insomnia compared with the placebo acupuncture group. Second, we will  
31 determine whether acupuncture has a curative effect on insomnia with short sleep  
32 duration. Finally, we will examine whether acupuncture treatment for two phenotypes  
33 of insomnia has a difference in efficacy.

34  
35  
36  
37  
38  
39  
40  
41  
42  
43  
44  
45  
46  
47  
48  
49  
50  
51  
52  
53  
54  
55  
56  
57  
58  
59  
60  
In fact, past studies have not completely found a reliable method to properly define  
the insomnia phenotype, which is largely due to the lack of biomarkers for insomnia or  
objective indicators that can be used for classification. Some clinical practice guidelines  
do not recommend PSG as a diagnostic tool and a severity assessment tool for insomnia  
[74]. However, an increasing number of studies have shown that the use of objective  
sleep assessment tools to classify insomnia has a great effect on the analysis of many  
potential disease incidences [9-10,75]. This study provides further support for the use of  
an objective sleep index to help diagnose and treat the specific phenotypes of insomnia.

This study used actigraphy as a sleep time measurement tool and an objective  
assessment tool for sleep without introducing the PSG. Compared with actigraphy, PSG  
requires a bed rest time of approximately 8 h, but actigraphy does not have this  
limitation. By reviewing the previous literature comparing the differences between the

1  
2  
3  
4 two measurement tools <sup>[64-65,76-77]</sup>, actigraphy has a good fit to PSG in assessing the time  
5 of sleep and wakefulness in insomnia patients. However, to a certain extent, actigraphy  
6 is more likely to underestimate sleep maintenance time and overestimate the total  
7 arousal time, which may result in some of the subjects with a total sleep time > 6 h  
8 being included in the group of patients with insomnia with short sleep duration.  
9 However, first, the gap is small. Second, the conclusions of these differences under this  
10 inclusion criterion may represent a greater actual difference between the two  
11 phenotypes. In addition, using one-night PSG to evaluate the subject's objective sleep  
12 time has a first-night effect. Therefore, we chose a week of actigraphy data to assess  
13 the objective indicators. Moreover, previous studies have shown that actigraphy can be  
14 used as a useful and efficient tool to assess the sleep patterns of individuals in their own  
15 sleep environment <sup>[78-79]</sup>.

16  
17 The use of placebo control in acupuncture trials remains controversial <sup>[80]</sup>. In  
18 pharmacological treatment trials, an ideal placebo should be indistinguishable from the  
19 true interventions and be physiologically inert <sup>[81]</sup>. However, it remains a challenge to  
20 design an adequate placebo for non-pharmacological interventions, such as acupuncture,  
21 in which non-specific treatment will be exists in the placebo group <sup>[82]</sup>. Since placebo  
22 acupuncture can produce a significant non-specific therapeutic effects, there is little  
23 space left for the assumed specific effect of acupuncture <sup>[83]</sup>. Therefore, we expect that  
24 in the future research work, researchers will invent a more authoritative placebo  
25 acupuncture.

26  
27 This study is the first trial to use acupuncture as an intervention to treat different  
28 phenotypes of insomnia. Our conclusions will expand the research results of previous  
29 studies and will further explain that insomnia with short objective sleep duration is a  
30 biologically more serious insomnia phenotype. These patients require more specific  
31 attention and more specific treatment options.

## 32 33 34 35 36 37 38 39 40 41 42 43 44 45 46 47 48 49 50 51 52 53 54 55 56 57 **Acknowledgements**

58 The authors thank Mrs Cong-quan Yin and Pro Xiao-peng Ma for their comments and  
59  
60

1  
2  
3  
4 suggestions on the protocol.  
5  
6  
7

## 8 **Author Contributions**

9  
10 CW and YFC conceived the research plan. CW and WJY drafted the protocol. XTY,  
11 CF, JYL and JW coordinated the study. WLX, YXZ and CW recruited the subjects. CW  
12 and WJY formed the analysis plan. All authors participated in, read and approved the  
13 final manuscript.  
14  
15  
16  
17  
18  
19  
20

## 21 **Funding**

22  
23 This work was supported by: The Construction of Chinese Medicine Heritage  
24 Innovation Platform (Project No.: ZY (2018-2020)-CCCX-2004-03); The Shanghai  
25 Science and Technology Commission (Project No.: 18401971000); The Shanghai  
26 Municipal Commission of Health and Family Planning (Project No.:  
27 ZYKC201703006); The National Natural Science Funds of China (Grant No.  
28 81503631); The Interdisciplinary Project of “Clinical Immunology of Traditional  
29 Chinese Medicine” in Shanghai (Project No.: 30304113598).  
30  
31  
32  
33  
34  
35  
36

37 This funding source had no role in the design of this study and will not have any role  
38 during its execution, analyses, interpretation of the data, or decision to submit results.  
39  
40  
41  
42  
43

## 44 **Competing interests**

45 None declared.  
46  
47  
48  
49  
50

## 51 **Patient and public involvement**

52 Patients' priorities, experience and preferences were not involved in development of  
53 the research question and outcome measures, the design of this study, or the recruitment  
54 to and conduct of the study. The results will be not disseminated to study participants.  
55  
56  
57  
58  
59  
60

## Ethics approval

The trial has been approved by the ethics committee of Yueyang Hospital of Integrated Traditional Chinese and Western Medicine (No.: 2019-17).

## Provenance and peer review

Not commissioned; externally peer reviewed.

## References

- [1] Suh S, Cho N, Zhang J. Sex Differences in Insomnia: from Epidemiology and Etiology to Intervention. *Curr Psychiatry Rep.* 2018 ;20(9):69.
- [2] Knutson KL, Van Cauter E, Rathouz PJ, et al. Trends in the prevalence of short sleepers in the USA: 1975-2006. *Sleep.* 2010; 33(1): 37–45.
- [3] Dashti HS, Scheer FAJL, Jacques PF, et al. Short Sleep Duration and Dietary Intake: Epidemiologic Evidence, Mechanisms, and Health Implications. *Adv Nutr.* 2015;6(6):648-659.
- [4] Ayas NT, White DP, Al-Delaimy WK, et al. A Prospective Study of Self-Reported Sleep Duration and Incident Diabetes in Women. *Diabetes Care.* 2003;26(2):380-384.
- [5] Tobaldini E, Fiorelli EM, Solbiati M, et al. Short sleep duration and cardiometabolic risk: from pathophysiology to clinical evidence. *Nat Rev Cardiol.* 2018; doi: 10.1038/s41569-018-0109-6.
- [6] Li J, Huang Z, Hou J, et al. Sleep and CKD in Chinese Adults: A Cross-Sectional Study. *Clin J Am Soc Nephrol.* 2017; 12(6):885-892.
- [7] Vgontzas AN, Liao D, Bixler EO, et al. Insomnia with objective short sleep duration is associated with a highrisk for hypertension. *Sleep.* 2009; 32:491–497.
- [8] Rosinger AY, Chang AM, Buxton O, et al. Short sleep duration is associated with inadequate hydration: Cross-cultural evidence from US and Chinese adults, *Sleep*, 2018 Nov 5. doi: 10.1093/sleep/zsy210. [Epub ahead of print]
- [9] Sivertsen B, Pallesen S, Glozier N, et al. Midlife insomnia and subsequent mortality: The Hordaland health study. *BMC Public Health.* 2014;14: 720.



- 1  
2  
3  
4 [10] Vgontzas AN, Fernandez-Mendoza J. Insomnia with short sleep duration: nosological,  
5 diagnostic, and treatment implications. *Sleep MedClin*. 2013; 8(3): 309–322.  
6  
7 [11] Qaseem A, Kansagara D, Forcica MA, et al. Management of Chronic Insomnia Disorder  
8 in Adults: A Clinical Practice Guideline from the American College of Physicians. *Ann Intern*  
9 *Med*. 2016; 165(2):125-133.  
10  
11 [12] Dieter Riemann, Chiara Baglioni, Claudio Bassett, European guideline for the diagnosis  
12 and treatment of insomnia. *European Sleep Research Society*. 2017; 26(6):675-700.  
13  
14 [13] Chinese Sleep Research Society. Guidelines for diagnosis and treatment of insomnia in  
15 China. *Natl Med J China*. 2017; 97(24): 1844-1856.  
16  
17 [14] Bathgate CJ, Edinger JD, Krystal AD. Insomnia Patients with Objective Short Sleep  
18 Duration Have a Blunted Response to Cognitive Behavioral Therapy for Insomnia. *Sleep*. 2017;  
19 40(1). doi: 10.1093/sleep/zsw012.  
20  
21 [15] Trauer JM, Qian MY, Doyle JS, Rajaratnam SM, Cunnington D. Cognitive behavioral  
22 therapy for chronic insomnia: a systematic review and meta-analysis. *Ann Intern Med*. 2015;  
23 163(3): 191–204.  
24  
25 [16] Vgontzas AN, Fernandez-Mendoza J, Liao D, Bixler EO. Insomnia with objective short  
26 sleep duration: the most biologically severe phenotype of the disorder. *Sleep Med Rev*. 2013;  
27 17: 241-254.  
28  
29 [17] Buscemi N, Vandermeer B, Friesen C, et al. The efficacy and safety of drug treatments for  
30 chronic insomnia in adults: a meta-analysis of RCTs. *J Gen Intern Med*. 2007;22(9): 1335–  
31 1350.  
32  
33 [18] Akemi Miyata, Kunihiro Iwamoto, Naoko Kawano, et al. The effects of acute treatment  
34 with ramelteon, triazolam, and placebo on driving performance, cognitive function, and  
35 equilibrium function in healthy volunteers. *Psychopharmacology*. 2015; 232(12): 2127-37.  
36  
37 [19] Yeung WF, Chung KF, Leung YK, et al. Traditional needle acupuncture treatment for  
38 insomnia: a systematic review of randomized controlled trials. *Sleep Med*. 2009; 10(7):694-  
39 704.  
40  
41 [20] Sarris J, Byrne GJ. A systematic review of insomnia and complementary medicine. *Sleep*  
42 *Med Rev*. 2011; 15(2):99-106.  
43  
44 [21] Yin X, Gou M, Xu J, et al. Efficacy and safety of acupuncture treatment on primary  
45  
46  
47  
48  
49  
50  
51  
52  
53  
54  
55  
56  
57  
58  
59  
60

1  
2  
3  
4 insomnia: a randomized controlled trial. *Sleep Med.* 2017; 37:193-200.

5 [22] Fu C, Zhao N, Liu Z. Acupuncture Improves Peri-menopausal Insomnia: A Randomized  
6 Controlled Trial. *Sleep.* 2017;40(11). doi: 10.1093/sleep/zsx153

7  
8 [23] Cheuk DK, Yeung WF, Chung KF, et al. Acupuncture for insomnia. *Cochrane Database*  
9 *Syst Rev.* 2012; (9): CD005472.

10  
11 [24] Chen JM. Zang Xiang Theory. In: *Traditional Chinese Medicine.* Shanghai: Shanghai  
12 *Medical University;*1985.

13  
14 [25] Feng SW, Zeng F, Ren YL, et al. Discussion on disease spectrum treated with acupuncture  
15 at shenmen (HT 7) and its compatibility based on bibliometrics. *Zhongguo Zhen Jiu.*  
16 2014;34(6):561-564.

17  
18 [26] Kim YS, Lee SH, Jung WS, et al. Intradermal acupuncture on shen-men and nei-kuan  
19 acupoints in patients with insomnia after stroke. *Am J Chin Med.* 2004;32(5):771-778.

20  
21 [27] da Silva J B, Nakamura M U, Cordeiro J A, et al. Acupuncture for insomnia in pregnancy--  
22 a prospective, quasi-randomised, controlled study. *Acupuncture in Medicine.* 2004, 22(2):60-  
23 67.

24  
25 [28] Buysse DJ, Ancoli-Israel S, Edinger JD, et al. Recommendations for a standard research  
26 assessment of insomnia. *Sleep.*2006;29(9):1155-1173.

27  
28 [29] Buysse DJ, Reynolds CF, Monk TH, et al. The Pittsburgh Sleep Quality Index (PSQI): A  
29 new instrument for psychiatric research and practice. *Psychiatry Res.* 1989; 28:193-213.

30  
31 [30] Morin CM. *Insomnia: Psychological assessment and management.* New York-London:  
32 *The Guilford Press;* 1993.

33  
34 [31] Bastien CH, Vallières A, Morin CM. Validation of the Insomnia Severity Index as an  
35 outcome measure for insomnia research. *Sleep Med.* 2001;2(4): 297–307.

36  
37 [32] Ancoli-Israel S. Actigraphy. In: Kryger MH, Roth T, Dement WC, eds. *Principles and*  
38 *practice of sleep medicine, fourth edition.* 4th ed. Philadelphia, PA: Saunders; 2005:1459-1467.

39  
40 [33] Sateia MJ. Epidemiology, consequences, and evaluation of insomnia. In: Lee-Chiong TL,  
41 Sateia MJ, Carskadon MA, eds. *Sleep Medicine.* Philadelphia, PA: Hanley and Belfus; 2002:  
42 151-160.

43  
44 [34] Manne S, Nereo N, DuHamel K, et al. Anxiety and depression in mothers of children  
45 undergoing bone marrow transplant: symptom prevalence and use of the Beck depression and  
46  
47  
48  
49  
50  
51  
52  
53  
54  
55  
56  
57  
58  
59  
60

1  
2  
3  
4 Beck anxiety inventories as screening instruments. *J Consult Clin Psychol*. 2001;69(6):1037-  
5 1047.

6  
7 [35] Beck AT, Steer RA, Ball R, et al. Comparison of Beck Depression Inventories -IA and -II  
8 in psychiatric outpatients. *J Pers Assess*.1996;67:588-597.

9  
10 [36] Krupp LB, LaRocca NG, Muir-Nash J, et al. The fatigue severity scale: Application to  
11 patients with multiple sclerosis and systemic lupus erythematosus. *Arch Neurol*. 1989;  
12 46:1121-1123.

13  
14 [37] Schutte-Rodin S, Broch L, Buysse D, et al. Clinical guideline for the evaluation and  
15 management of chronic insomnia in adults. *J Clin Sleep Med*. 2008;4(5):487-504.

16  
17 [38] Michael Sateia. American Academy of Sleep Medicine. International Classification of  
18 Sleep Disorders (Third Edition). USA: American Academy of Sleep Medicine.2014; 3rd ed.

19  
20 [39] Ibáñez V, Silva J, Cauli O. A survey on sleep questionnaires and diaries. *Sleep Med*. 2018;  
21 42:90-96.

22  
23 [40] AP A. Diagnostic and statistical manual of mental disorders: DSM- V. Washington (DC):  
24 American Psychiatric Publishing; 2013.

25  
26 [41] Yeung WF, Chung KF, Zhang SP, et al. Electroacupuncture for primary insomnia: a  
27 randomized controlled trial. *Sleep*. 2009; 32(8):1039–1047.

28  
29 [42] Huang W, Kutner N, Bliwise DL. A systematic review of the effects of acupuncture in  
30 treating insomnia. *Sleep Med Rev*. 2009;13(1):73-104.

31  
32 [43] Huang KY, Liang S, Xu YT, et al. Law of acupoint selection in acupuncture treatment for  
33 insomnia based on data mining method. *Chinese acupuncture and moxibustion*.  
34 2015;35(9):960-963.

35  
36 [44] White AR, Filshie J, Cummings TM; International Acupuncture Research Forum. Clinical  
37 trials of acupuncture: consensus recommendations for optimal treatment, sham controls and  
38 blinding. *Complement Ther Med*. 2001; 9(4): 237–245.

39  
40 [45] Zhou W, Benharash P. Significance of "Deqi" response in acupuncture treatment: myth or  
41 reality. *J Acupunct Meridian Stud*. 2014;7(4):186-189.

42  
43 [46] Streitberger K, Kleinhenz J. Introducing a placebo needle into acupuncture research.  
44 *Lancet*. 1998; 352(9125): 364–365.

45  
46 [47] Yeung WF, Chung KF, Tso KC, et al. Electroacupuncture for residual insomnia associated  
47  
48  
49  
50  
51  
52  
53  
54  
55  
56  
57  
58  
59  
60

1  
2  
3  
4 with major depressive disorder: a randomized controlled trial. *Sleep*. 2011; 34(6):807–815.

5 [48] Kim M, Kim JE, Lee HY, et al. Electroacupuncture for treating insomnia in patients with  
6 cancer: a study protocol for a randomised pilot clinical trial. *BMJ Open*. 2017; 7(8): e016269.  
7  
8 doi: 10.1136/bmjopen-2017-016269.

9  
10  
11 [49] Xie CC, Wen XY, Jiang L, et al. Validity of the “streitberger” needle in a Chinese  
12 population with acupuncture: a randomized, single blinded, and crossover pilot study. *Evid*  
13  
14  
15  
16  
17  
18  
19  
20  
21  
22  
23  
24  
25  
26  
27  
28  
29  
30  
31  
32  
33  
34  
35  
36  
37  
38  
39  
40  
41  
42  
43  
44  
45  
46  
47  
48  
49  
50  
51  
52  
53  
54  
55  
56  
57  
58  
59  
60  
Based Complement Alternat Med. 2013; 2013: 251603.

[50] Kim M, Kim JE, Lee HY, et al. Electroacupuncture for treating insomnia in patients with  
cancer: a study protocol for a randomised pilot clinical trial. *Bmj Open*. 2017; 7(8): e016269.

[51] Brinkhaus B, Witt CM, Jena S, et al. Interventions and physician characteristics in a  
randomized multicenter trial of acupuncture in patients with low-back pain. *J Altern*  
*Complement Med*. 2006; 12(7): 649–657.

[52] Morin CM. Measuring outcomes in randomized clinical trials of insomnia treatments.  
*Sleep Medicine Reviews*. 2003;7(3):263-279.

[53] Carpenter JS, Andrykowski MA. Psychometric evaluation of the pittsburgh sleep quality  
index. *J Psychosom Res*. 1998; 45:5–13.

[54] Doi Y, Minowa M, Uchiyama M, et al. Psychometric assessment of subjective sleep  
quality using the Japanese version of the Pittsburgh Sleep Quality Index (PSQI-J) in psychiatric  
disordered and control subjects. *Psychiatry Res* 2000; 97:165–172.

[55] Mollayeva T, Thurairajah P, Burton K, et al. The Pittsburgh Sleep Quality Index as a  
screening tool for sleep dysfunction in clinical and nonclinical samples: a systematic review  
and meta-analysis. *Sleep Med Rev*. 2016; 25:52–73.

[56] Pilz LK, Keller LK, Lenssen D. Time to rethink sleep quality: PSQI scores reflect sleep  
quality on workdays. *Sleep*. 2018;41(5). doi: 10.1093/sleep/zsy029.

[57] Backhaus J, Junghanns K, Broocks A, et al. Test-retest reliability and validity of the  
Pittsburgh Sleep Quality Index in primary insomnia. *J Psychosom Res*. 2002; 53(3): 737–740.

[58] Zheng B, Li M, Wang KL, et al. Analysis of the reliability and validity of the Chinese  
version of Pittsburgh sleep quality index among medical college students. *Beijing Da Xue Xue*  
*Bao*. 2016; 48(3): 424–428.

[59] Liu XC, Tang MQ, Hu L, et al. Reliability and validity of the Pittsburgh sleep quality index.

1  
2  
3  
4  
5  
6  
7  
8  
9  
10  
11  
12  
13  
14  
15  
16  
17  
18  
19  
20  
21  
22  
23  
24  
25  
26  
27  
28  
29  
30  
31  
32  
33  
34  
35  
36  
37  
38  
39  
40  
41  
42  
43  
44  
45  
46  
47  
48  
49  
50  
51  
52  
53  
54  
55  
56  
57  
58  
59  
60

Chin J Psychiatry. 1996; 29(2): 103-107.

[60] Chen PY, Yang CM, Morin CM. Validating the cross-cultural factor structure and invariance property of the Insomnia Severity Index: evidence based on ordinal EFA and CFA. Sleep Med. 2015;16(5):598-603.

[61] Morin CM, Belleville G, Bélanger L, et al. The Insomnia Severity Index: psychometric indicators to detect insomnia cases and evaluate treatment response. Sleep. 2011;34(5):601-608.

[62] Yu DS. Insomnia Severity Index: psychometric properties with Chinese community dwelling older people. J Adv Nurs. 2010; 66(10):2350–2359.

[63] Lichstein KL, Stone KC, Donaldson J, et al. Actigraphy validation with insomnia. Sleep. 2006; 29:232-239.

[64] Vallières A, Morin CM. Actigraphy in the assessment of insomnia. Sleep. 2003; 26(7): 902–906.

[65] Natale V, Plazzi G, Martoni M. Actigraphy in the assessment of insomnia: a quantitative approach. Sleep. 2009 ;32(6):767-771.

[66] Beck AT, Epstein N, Brown G, et al. An inventory for measuring clinical anxiety: psychometric properties. Consult Clin Psychol. 1988; 56(6): 893-897.

[67] Ceng KW, Wong CW, Wong KC, et al. A Study of Psychometric Properties, Normative Scores and Factor Structure of Beck Anxiety Inventory Chinese Version. Chinese Journal of Clinical Psychology. 2002;10(1):4-6.

[68] Wang Z, Yuan CM, Huang J, et al. Reliability and validity of the Chinese version of Beck Depression Inventory-II among depression patients. Chinese Mental Health Journal. 2011, 25(6): 476-480.

[69] Lichstein KL, Durrence HH, Riedel BW, et al. Epidemiology of Sleep: Age, Gender, and Ethnicity. New Jersey: Lawrence Erlbaum Associates, Inc.; 2004.

[70] Wang MY, Liu IC, Chiu CH, et al. Cultural adaptation and validation of the Chinese version of the Fatigue Severity Scale in patients with major depressive disorder and nondepressive people. Qual Life Res. 2016 ;25(1):89-99.

[71] Levine J, Schooler NR. SAFTEE: A technique for the systematic assessment of side effects in clinical trials. Psychopharmacol Bull. 1986; 22(2):343–381.

[72] Sakpal TV. Sample size estimation in clinical trial. Perspect Clin Res. 2010;1(2):67-69.

1  
2  
3  
4 [73] Chandan S, Jones MP Bias in the last observation carried forward method under  
5 informative dropout. *J Stat Plan Inference*. 2009;139:246–255.

6  
7 [74] Littner M, Hirshkowitz M, Kramer M, et al. Practice parameters for using  
8 polysomnography to evaluate insomnia: an update. *Sleep*. 2003; 26(6): 754–760.

9  
10 [75] Fernandez-Mendoza J, Shea S, Vgontzas AN, et al. Insomnia and incident depression: role  
11 of objective sleep duration and natural history. *J Sleep Res*. 2015; 24(4): 390–398.

12  
13 [76] Edinger JD, Means MK, Stechuchak KM, et al. A pilot study of inexpensive sleep  
14 assessment devices. *Behav Sleep Med*. 2004; 2(1): 41–49.

15  
16 [77] Friedman L, Benson K, Noda A, et al. An actigraphic comparison of sleep restriction and  
17 sleep hygiene treatments for insomnia in older adults. *J Geriatr Psychiatry Neurol*. 2000; 13(1):  
18 17–27.

19  
20 [78] Ancoli-Israel S, Cole R, Alessi C, et al. The role of actigraphy in the study of sleep and  
21 circadian rhythms. *Sleep*. 2003; 26(3): 342–392.

22  
23 [79] Sánchez-Ortuño MM, Edinger JD, Means MK, et al. Home is where sleep is: an ecological  
24 approach to test the validity of actigraphy for the assessment of insomnia. *J Clin Sleep Med*.  
25 2010; 6(1):21–29.

26  
27 [80] Walach, Harald. The Efficacy Paradox in Randomized Controlled Trials of CAM and  
28 Elsewhere: Beware of the Placebo Trap. *The Journal of Alternative and Complementary  
29 Medicine*. 2001; 7(3):213-218.

30  
31 [81] Paterson, C. Characteristic and incidental (placebo) effects in complex interventions such  
32 as acupuncture. *BMJ*. 2005; 330(7501):1202-1205.

33  
34 [82] Verhoef MJ, Lewith G, Ritenbaugh C, et al. Complementary and alternative medicine  
35 whole systems research: Beyond identification of inadequacies of the RCT. *Complementary  
36 Therapies in Medicine*. 2005; 13(3):206-212.

37  
38 [83] Zheng YC, Yuan TT, Liu T. Is acupuncture a placebo therapy?. *Complementary Therapies  
39 in Medicine*. 2014; 22(4):724-730.

#### 40 41 42 43 44 45 46 47 48 49 50 51 52 53 54 55 56 **Fig.1. Trial flow chart**

57  
58 HCG: Human chorionic gonadotropin

59  
60 PSG: Polysomnography

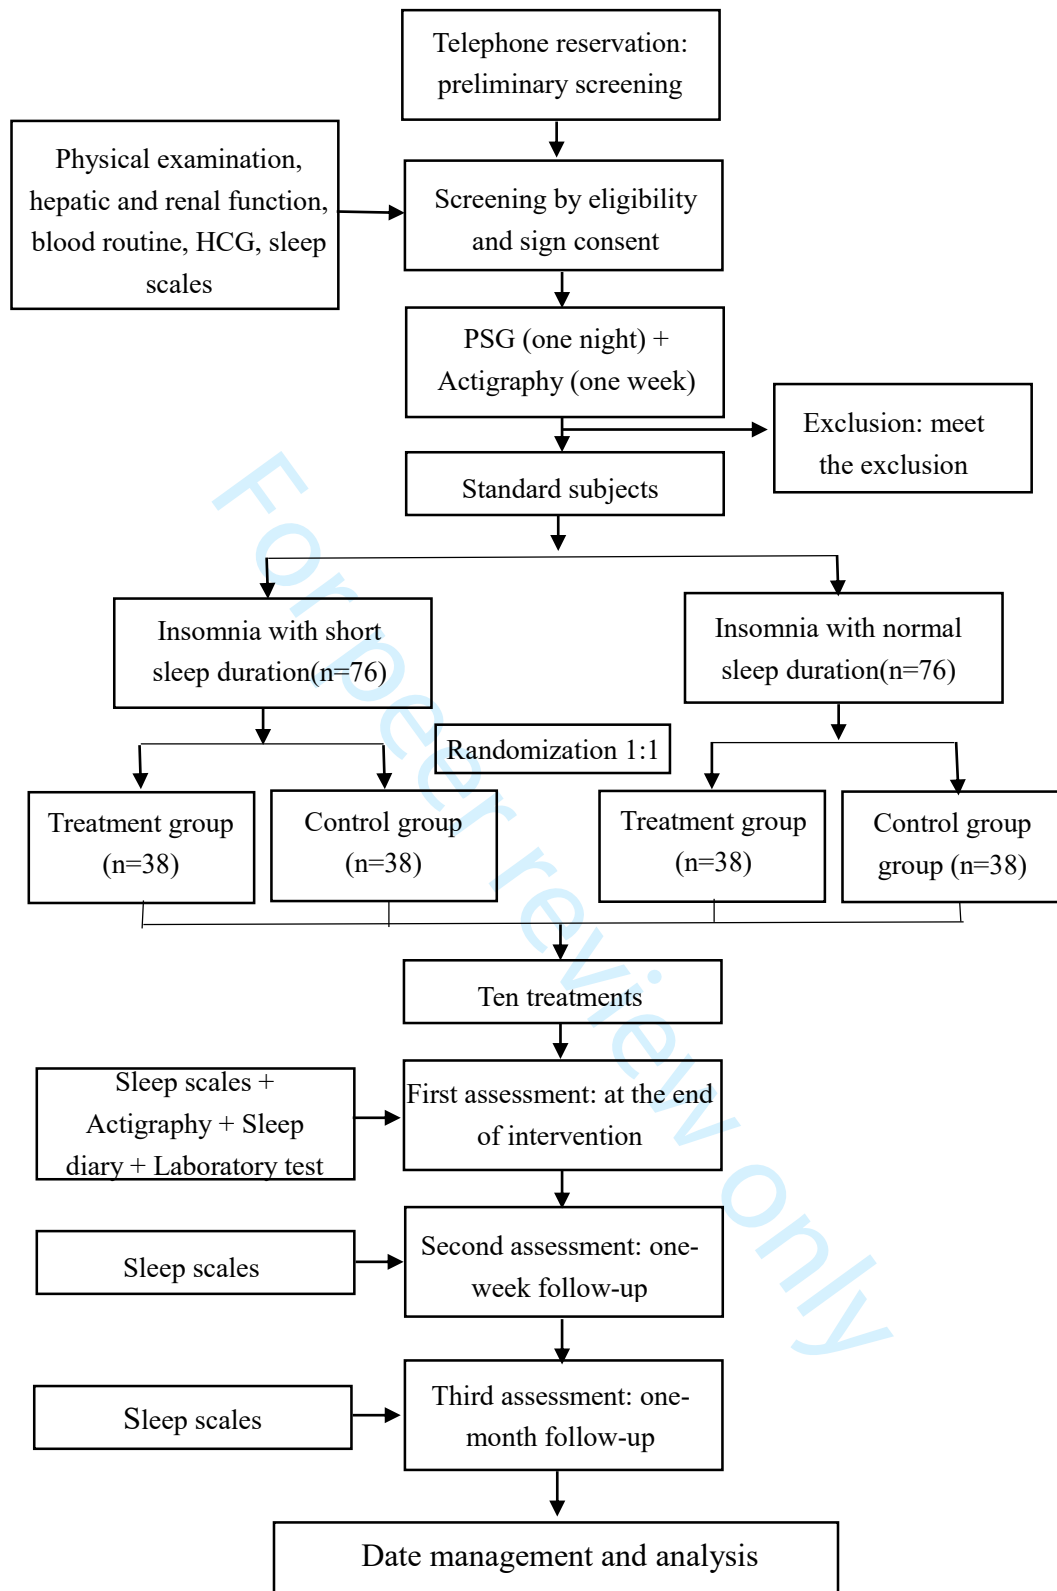

Fig.1. Trial flow chart

# Reporting checklist for protocol of a clinical trial.

Based on the SPIRIT guidelines.

## Instructions to authors

Complete this checklist by entering the page numbers from your manuscript where readers will find each of the items listed below.

Your article may not currently address all the items on the checklist. Please modify your text to include the missing information. If you are certain that an item does not apply, please write "n/a" and provide a short explanation.

Upload your completed checklist as an extra file when you submit to a journal.

In your methods section, say that you used the SPIRIT reporting guidelines, and cite them as:

Chan A-W, Tetzlaff JM, Altman DG, Laupacis A, Gøtzsche PC, Krleža-Jerić K, Hróbjartsson A, Mann H, Dickersin K, Berlin J, Doré C, Parulekar W, Summerskill W, Groves T, Schulz K, Sox H, Rockhold FW, Rennie D, Moher D. SPIRIT 2013 Statement: Defining standard protocol items for clinical trials. *Ann Intern Med.* 2013;158(3):200-207

|                                             |                     | Reporting Item                                                                                               | Page Number |
|---------------------------------------------|---------------------|--------------------------------------------------------------------------------------------------------------|-------------|
| <b>Administrative information</b>           |                     |                                                                                                              |             |
| Title                                       | <a href="#">#1</a>  | Descriptive title identifying the study design, population, interventions, and, if applicable, trial acronym | 1           |
| Trial registration                          | <a href="#">#2a</a> | Trial identifier and registry name. If not yet registered, name of intended registry                         | 1           |
| Trial registration: data set                | <a href="#">#2b</a> | All items from the World Health Organization Trial Registration Data Set                                     | 1           |
| Protocol version                            | <a href="#">#3</a>  | Date and version identifier                                                                                  | n/a         |
| Funding                                     | <a href="#">#4</a>  | Sources and types of financial, material, and other support                                                  | 18          |
| Roles and responsibilities: contributorship | <a href="#">#5a</a> | Names, affiliations, and roles of protocol contributors                                                      | 18          |



|    |                           |                     |                                                                      |     |
|----|---------------------------|---------------------|----------------------------------------------------------------------|-----|
| 1  | Roles and                 | <a href="#">#5b</a> | Name and contact information for the trial sponsor                   | n/a |
| 2  | responsibilities:         |                     |                                                                      |     |
| 3  | sponsor contact           |                     |                                                                      |     |
| 4  | information               |                     |                                                                      |     |
| 5  |                           |                     |                                                                      |     |
| 6  |                           |                     |                                                                      |     |
| 7  |                           |                     |                                                                      |     |
| 8  | Roles and                 | <a href="#">#5c</a> | Role of study sponsor and funders, if any, in study design;          | n/a |
| 9  | responsibilities:         |                     | collection, management, analysis, and interpretation of data;        |     |
| 10 | sponsor and funder        |                     | writing of the report; and the decision to submit the report for     |     |
| 11 |                           |                     | publication, including whether they will have ultimate authority     |     |
| 12 |                           |                     | over any of these activities                                         |     |
| 13 |                           |                     |                                                                      |     |
| 14 |                           |                     |                                                                      |     |
| 15 |                           |                     |                                                                      |     |
| 16 | Roles and                 | <a href="#">#5d</a> | Composition, roles, and responsibilities of the coordinating centre, | n/a |
| 17 | responsibilities:         |                     | steering committee, endpoint adjudication committee, data            |     |
| 18 | committees                |                     | management team, and other individuals or groups overseeing the      |     |
| 19 |                           |                     | trial, if applicable (see Item 21a for data monitoring committee)    |     |
| 20 |                           |                     |                                                                      |     |
| 21 |                           |                     |                                                                      |     |
| 22 |                           |                     |                                                                      |     |
| 23 | <b>Introduction</b>       |                     |                                                                      |     |
| 24 |                           |                     |                                                                      |     |
| 25 | Background and            | <a href="#">#6a</a> | Description of research question and justification for undertaking   | 3   |
| 26 | rationale                 |                     | the trial, including summary of relevant studies (published and      |     |
| 27 |                           |                     | unpublished) examining benefits and harms for each intervention      |     |
| 28 |                           |                     |                                                                      |     |
| 29 |                           |                     |                                                                      |     |
| 30 | Background and            | <a href="#">#6b</a> | Explanation for choice of comparators                                | 3   |
| 31 | rationale: choice of      |                     |                                                                      |     |
| 32 | comparators               |                     |                                                                      |     |
| 33 |                           |                     |                                                                      |     |
| 34 |                           |                     |                                                                      |     |
| 35 |                           |                     |                                                                      |     |
| 36 | Objectives                | <a href="#">#7</a>  | Specific objectives or hypotheses                                    | 4   |
| 37 |                           |                     |                                                                      |     |
| 38 | Trial design              | <a href="#">#8</a>  | Description of trial design including type of trial (eg, parallel    | 4   |
| 39 |                           |                     | group, crossover, factorial, single group), allocation ratio, and    |     |
| 40 |                           |                     | framework (eg, superiority, equivalence, non-inferiority,            |     |
| 41 |                           |                     | exploratory)                                                         |     |
| 42 |                           |                     |                                                                      |     |
| 43 |                           |                     |                                                                      |     |
| 44 |                           |                     |                                                                      |     |
| 45 | <b>Methods:</b>           |                     |                                                                      |     |
| 46 | <b>Participants,</b>      |                     |                                                                      |     |
| 47 | <b>interventions, and</b> |                     |                                                                      |     |
| 48 | <b>outcomes</b>           |                     |                                                                      |     |
| 49 |                           |                     |                                                                      |     |
| 50 |                           |                     |                                                                      |     |
| 51 |                           |                     |                                                                      |     |
| 52 | Study setting             | <a href="#">#9</a>  | Description of study settings (eg, community clinic, academic        | 4   |
| 53 |                           |                     | hospital) and list of countries where data will be collected.        |     |
| 54 |                           |                     | Reference to where list of study sites can be obtained               |     |
| 55 |                           |                     |                                                                      |     |
| 56 |                           |                     |                                                                      |     |
| 57 | Eligibility criteria      | <a href="#">#10</a> | Inclusion and exclusion criteria for participants. If applicable,    | 7   |
| 58 |                           |                     | eligibility criteria for study centres and individuals who will      |     |
| 59 |                           |                     |                                                                      |     |
| 60 |                           |                     |                                                                      |     |

perform the interventions (eg, surgeons, psychotherapists)

|    |                              |                      |                                                                       |
|----|------------------------------|----------------------|-----------------------------------------------------------------------|
| 1  |                              |                      |                                                                       |
| 2  |                              |                      |                                                                       |
| 3  | Interventions:               | <a href="#">#11a</a> | Interventions for each group with sufficient detail to allow          |
| 4  | description                  |                      | replication, including how and when they will be administered         |
| 5  |                              |                      |                                                                       |
| 6  | Interventions:               | <a href="#">#11b</a> | Criteria for discontinuing or modifying allocated interventions for a |
| 7  | modifications                |                      | given trial participant (eg, drug dose change in response to harms,   |
| 8  |                              |                      | participant request, or improving / worsening disease)                |
| 9  |                              |                      |                                                                       |
| 10 |                              |                      |                                                                       |
| 11 | Interventions:               | <a href="#">#11c</a> | Strategies to improve adherence to intervention protocols, and any    |
| 12 | adherence                    |                      | procedures for monitoring adherence (eg, drug tablet return;          |
| 13 |                              |                      | laboratory tests)                                                     |
| 14 |                              |                      |                                                                       |
| 15 |                              |                      |                                                                       |
| 16 |                              |                      |                                                                       |
| 17 | Interventions:               | <a href="#">#11d</a> | Relevant concomitant care and interventions that are permitted or     |
| 18 | concomitant care             |                      | prohibited during the trial                                           |
| 19 |                              |                      |                                                                       |
| 20 |                              |                      |                                                                       |
| 21 | Outcomes                     | <a href="#">#12</a>  | Primary, secondary, and other outcomes, including the specific        |
| 22 |                              |                      | measurement variable (eg, systolic blood pressure), analysis metric   |
| 23 |                              |                      | (eg, change from baseline, final value, time to event), method of     |
| 24 |                              |                      | aggregation (eg, median, proportion), and time point for each         |
| 25 |                              |                      | outcome. Explanation of the clinical relevance of chosen efficacy     |
| 26 |                              |                      | and harm outcomes is strongly recommended                             |
| 27 |                              |                      |                                                                       |
| 28 |                              |                      |                                                                       |
| 29 |                              |                      |                                                                       |
| 30 |                              |                      |                                                                       |
| 31 | Participant timeline         | <a href="#">#13</a>  | Time schedule of enrolment, interventions (including any run-ins      |
| 32 |                              |                      | and washouts), assessments, and visits for participants. A            |
| 33 |                              |                      | schematic diagram is highly recommended (see Figure)                  |
| 34 |                              |                      |                                                                       |
| 35 |                              |                      |                                                                       |
| 36 | Sample size                  | <a href="#">#14</a>  | Estimated number of participants needed to achieve study              |
| 37 |                              |                      | objectives and how it was determined, including clinical and          |
| 38 |                              |                      | statistical assumptions supporting any sample size calculations       |
| 39 |                              |                      |                                                                       |
| 40 |                              |                      |                                                                       |
| 41 | Recruitment                  | <a href="#">#15</a>  | Strategies for achieving adequate participant enrolment to reach      |
| 42 |                              |                      | target sample size                                                    |
| 43 |                              |                      |                                                                       |
| 44 |                              |                      |                                                                       |
| 45 | <b>Methods: Assignment</b>   |                      |                                                                       |
| 46 | <b>of interventions (for</b> |                      |                                                                       |
| 47 | <b>controlled trials)</b>    |                      |                                                                       |
| 48 |                              |                      |                                                                       |
| 49 |                              |                      |                                                                       |
| 50 | Allocation: sequence         | <a href="#">#16a</a> | Method of generating the allocation sequence (eg, computer-           |
| 51 | generation                   |                      | generated random numbers), and list of any factors for                |
| 52 |                              |                      | stratification. To reduce predictability of a random sequence,        |
| 53 |                              |                      | details of any planned restriction (eg, blocking) should be provided  |
| 54 |                              |                      | in a separate document that is unavailable to those who enrol         |
| 55 |                              |                      | participants or assign interventions                                  |
| 56 |                              |                      |                                                                       |
| 57 |                              |                      |                                                                       |
| 58 |                              |                      |                                                                       |
| 59 |                              |                      |                                                                       |
| 60 |                              |                      |                                                                       |

|    |                        |                      |                                                                       |     |
|----|------------------------|----------------------|-----------------------------------------------------------------------|-----|
| 1  | Allocation concealment | <a href="#">#16b</a> | Mechanism of implementing the allocation sequence (eg, central        | 14  |
| 2  | mechanism              |                      | telephone; sequentially numbered, opaque, sealed envelopes),          |     |
| 3  |                        |                      | describing any steps to conceal the sequence until interventions are  |     |
| 4  |                        |                      | assigned                                                              |     |
| 5  |                        |                      |                                                                       |     |
| 6  |                        |                      |                                                                       |     |
| 7  |                        |                      |                                                                       |     |
| 8  | Allocation:            | <a href="#">#16c</a> | Who will generate the allocation sequence, who will enrol             | 14  |
| 9  | implementation         |                      | participants, and who will assign participants to interventions       |     |
| 10 |                        |                      |                                                                       |     |
| 11 | Blinding (masking)     | <a href="#">#17a</a> | Who will be blinded after assignment to interventions (eg, trial      | 14  |
| 12 |                        |                      | participants, care providers, outcome assessors, data analysts), and  |     |
| 13 |                        |                      | how                                                                   |     |
| 14 |                        |                      |                                                                       |     |
| 15 |                        |                      |                                                                       |     |
| 16 |                        |                      |                                                                       |     |
| 17 | Blinding (masking):    | <a href="#">#17b</a> | If blinded, circumstances under which unblinding is permissible,      | 14  |
| 18 | emergency unblinding   |                      | and procedure for revealing a participant's allocated intervention    |     |
| 19 |                        |                      | during the trial                                                      |     |
| 20 |                        |                      |                                                                       |     |
| 21 |                        |                      |                                                                       |     |
| 22 | <b>Methods: Data</b>   |                      |                                                                       |     |
| 23 | <b>collection,</b>     |                      |                                                                       |     |
| 24 | <b>management, and</b> |                      |                                                                       |     |
| 25 | <b>analysis</b>        |                      |                                                                       |     |
| 26 |                        |                      |                                                                       |     |
| 27 |                        |                      |                                                                       |     |
| 28 |                        |                      |                                                                       |     |
| 29 | Data collection plan   | <a href="#">#18a</a> | Plans for assessment and collection of outcome, baseline, and other   | 15  |
| 30 |                        |                      | trial data, including any related processes to promote data quality   |     |
| 31 |                        |                      | (eg, duplicate measurements, training of assessors) and a             |     |
| 32 |                        |                      | description of study instruments (eg, questionnaires, laboratory      |     |
| 33 |                        |                      | tests) along with their reliability and validity, if known. Reference |     |
| 34 |                        |                      | to where data collection forms can be found, if not in the protocol   |     |
| 35 |                        |                      |                                                                       |     |
| 36 |                        |                      |                                                                       |     |
| 37 |                        |                      |                                                                       |     |
| 38 |                        |                      |                                                                       |     |
| 39 | Data collection plan:  | <a href="#">#18b</a> | Plans to promote participant retention and complete follow-up,        | 15  |
| 40 | retention              |                      | including list of any outcome data to be collected for participants   |     |
| 41 |                        |                      | who discontinue or deviate from intervention protocols                |     |
| 42 |                        |                      |                                                                       |     |
| 43 |                        |                      |                                                                       |     |
| 44 | Data management        | <a href="#">#19</a>  | Plans for data entry, coding, security, and storage, including any    | 15  |
| 45 |                        |                      | related processes to promote data quality (eg, double data entry;     |     |
| 46 |                        |                      | range checks for data values). Reference to where details of data     |     |
| 47 |                        |                      | management procedures can be found, if not in the protocol            |     |
| 48 |                        |                      |                                                                       |     |
| 49 |                        |                      |                                                                       |     |
| 50 |                        |                      |                                                                       |     |
| 51 | Statistics: outcomes   | <a href="#">#20a</a> | Statistical methods for analysing primary and secondary outcomes.     | 15  |
| 52 |                        |                      | Reference to where other details of the statistical analysis plan can |     |
| 53 |                        |                      | be found, if not in the protocol                                      |     |
| 54 |                        |                      |                                                                       |     |
| 55 |                        |                      |                                                                       |     |
| 56 | Statistics: additional | <a href="#">#20b</a> | Methods for any additional analyses (eg, subgroup and adjusted        | n/a |
| 57 | analyses               |                      | analyses)                                                             |     |
| 58 |                        |                      |                                                                       |     |
| 59 |                        |                      |                                                                       |     |
| 60 |                        |                      |                                                                       |     |

|    |                            |                      |                                                                         |     |
|----|----------------------------|----------------------|-------------------------------------------------------------------------|-----|
| 1  | Statistics: analysis       | <a href="#">#20c</a> | Definition of analysis population relating to protocol non-             | n/a |
| 2  | population and missing     |                      | adherence (eg, as randomised analysis), and any statistical methods     |     |
| 3  | data                       |                      | to handle missing data (eg, multiple imputation)                        |     |
| 4  |                            |                      |                                                                         |     |
| 5  |                            |                      |                                                                         |     |
| 6  | <b>Methods: Monitoring</b> |                      |                                                                         |     |
| 7  |                            |                      |                                                                         |     |
| 8  | Data monitoring:           | <a href="#">#21a</a> | Composition of data monitoring committee (DMC); summary of its          | n/a |
| 9  | formal committee           |                      | role and reporting structure; statement of whether it is independent    |     |
| 10 |                            |                      | from the sponsor and competing interests; and reference to where        |     |
| 11 |                            |                      | further details about its charter can be found, if not in the protocol. |     |
| 12 |                            |                      | Alternatively, an explanation of why a DMC is not needed                |     |
| 13 |                            |                      |                                                                         |     |
| 14 |                            |                      |                                                                         |     |
| 15 |                            |                      |                                                                         |     |
| 16 |                            |                      |                                                                         |     |
| 17 | Data monitoring:           | <a href="#">#21b</a> | Description of any interim analyses and stopping guidelines,            | n/a |
| 18 | interim analysis           |                      | including who will have access to these interim results and make        |     |
| 19 |                            |                      | the final decision to terminate the trial                               |     |
| 20 |                            |                      |                                                                         |     |
| 21 |                            |                      |                                                                         |     |
| 22 | Harms                      | <a href="#">#22</a>  | Plans for collecting, assessing, reporting, and managing solicited      | 11  |
| 23 |                            |                      | and spontaneously reported adverse events and other unintended          |     |
| 24 |                            |                      | effects of trial interventions or trial conduct                         |     |
| 25 |                            |                      |                                                                         |     |
| 26 |                            |                      |                                                                         |     |
| 27 |                            |                      |                                                                         |     |
| 28 | Auditing                   | <a href="#">#23</a>  | Frequency and procedures for auditing trial conduct, if any, and        | n/a |
| 29 |                            |                      | whether the process will be independent from investigators and the      |     |
| 30 |                            |                      | sponsor                                                                 |     |
| 31 |                            |                      |                                                                         |     |
| 32 |                            |                      |                                                                         |     |
| 33 | <b>Ethics and</b>          |                      |                                                                         |     |
| 34 | <b>dissemination</b>       |                      |                                                                         |     |
| 35 |                            |                      |                                                                         |     |
| 36 |                            |                      |                                                                         |     |
| 37 | Research ethics            | <a href="#">#24</a>  | Plans for seeking research ethics committee / institutional review      | 19  |
| 38 | approval                   |                      | board (REC / IRB) approval                                              |     |
| 39 |                            |                      |                                                                         |     |
| 40 |                            |                      |                                                                         |     |
| 41 | Protocol amendments        | <a href="#">#25</a>  | Plans for communicating important protocol modifications (eg,           | n/a |
| 42 |                            |                      | changes to eligibility criteria, outcomes, analyses) to relevant        |     |
| 43 |                            |                      | parties (eg, investigators, REC / IRBs, trial participants, trial       |     |
| 44 |                            |                      | registries, journals, regulators)                                       |     |
| 45 |                            |                      |                                                                         |     |
| 46 |                            |                      |                                                                         |     |
| 47 | Consent or assent          | <a href="#">#26a</a> | Who will obtain informed consent or assent from potential trial         | n/a |
| 48 |                            |                      | participants or authorised surrogates, and how (see Item 32)            |     |
| 49 |                            |                      |                                                                         |     |
| 50 |                            |                      |                                                                         |     |
| 51 | Consent or assent:         | <a href="#">#26b</a> | Additional consent provisions for collection and use of participant     | n/a |
| 52 | ancillary studies          |                      | data and biological specimens in ancillary studies, if applicable       |     |
| 53 |                            |                      |                                                                         |     |
| 54 |                            |                      |                                                                         |     |
| 55 | Confidentiality            | <a href="#">#27</a>  | How personal information about potential and enrolled participants      | 14  |
| 56 |                            |                      | will be collected, shared, and maintained in order to protect           |     |
| 57 |                            |                      | confidentiality before, during, and after the trial                     |     |
| 58 |                            |                      |                                                                         |     |
| 59 |                            |                      |                                                                         |     |
| 60 |                            |                      |                                                                         |     |

|    |                                             |                      |                                                                                                                                                                                                                                                                                     |     |
|----|---------------------------------------------|----------------------|-------------------------------------------------------------------------------------------------------------------------------------------------------------------------------------------------------------------------------------------------------------------------------------|-----|
| 1  | Declaration of interests                    | <a href="#">#28</a>  | Financial and other competing interests for principal investigators for the overall trial and each study site                                                                                                                                                                       | 18  |
| 2  |                                             |                      |                                                                                                                                                                                                                                                                                     |     |
| 3  |                                             |                      |                                                                                                                                                                                                                                                                                     |     |
| 4  | Data access                                 | <a href="#">#29</a>  | Statement of who will have access to the final trial dataset, and disclosure of contractual agreements that limit such access for investigators                                                                                                                                     | n/a |
| 5  |                                             |                      |                                                                                                                                                                                                                                                                                     |     |
| 6  |                                             |                      |                                                                                                                                                                                                                                                                                     |     |
| 7  |                                             |                      |                                                                                                                                                                                                                                                                                     |     |
| 8  |                                             |                      |                                                                                                                                                                                                                                                                                     |     |
| 9  |                                             |                      |                                                                                                                                                                                                                                                                                     |     |
| 10 | Ancillary and post trial care               | <a href="#">#30</a>  | Provisions, if any, for ancillary and post-trial care, and for compensation to those who suffer harm from trial participation                                                                                                                                                       | n/a |
| 11 |                                             |                      |                                                                                                                                                                                                                                                                                     |     |
| 12 |                                             |                      |                                                                                                                                                                                                                                                                                     |     |
| 13 |                                             |                      |                                                                                                                                                                                                                                                                                     |     |
| 14 | Dissemination policy: trial results         | <a href="#">#31a</a> | Plans for investigators and sponsor to communicate trial results to participants, healthcare professionals, the public, and other relevant groups (eg, via publication, reporting in results databases, or other data sharing arrangements), including any publication restrictions | n/a |
| 15 |                                             |                      |                                                                                                                                                                                                                                                                                     |     |
| 16 |                                             |                      |                                                                                                                                                                                                                                                                                     |     |
| 17 |                                             |                      |                                                                                                                                                                                                                                                                                     |     |
| 18 |                                             |                      |                                                                                                                                                                                                                                                                                     |     |
| 19 |                                             |                      |                                                                                                                                                                                                                                                                                     |     |
| 20 |                                             |                      |                                                                                                                                                                                                                                                                                     |     |
| 21 | Dissemination policy: authorship            | <a href="#">#31b</a> | Authorship eligibility guidelines and any intended use of professional writers                                                                                                                                                                                                      | n/a |
| 22 |                                             |                      |                                                                                                                                                                                                                                                                                     |     |
| 23 |                                             |                      |                                                                                                                                                                                                                                                                                     |     |
| 24 | Dissemination policy: reproducible research | <a href="#">#31c</a> | Plans, if any, for granting public access to the full protocol, participant-level dataset, and statistical code                                                                                                                                                                     | n/a |
| 25 |                                             |                      |                                                                                                                                                                                                                                                                                     |     |
| 26 |                                             |                      |                                                                                                                                                                                                                                                                                     |     |
| 27 |                                             |                      |                                                                                                                                                                                                                                                                                     |     |
| 28 | <b>Appendices</b>                           |                      |                                                                                                                                                                                                                                                                                     |     |
| 29 |                                             |                      |                                                                                                                                                                                                                                                                                     |     |
| 30 |                                             |                      |                                                                                                                                                                                                                                                                                     |     |
| 31 | Informed consent materials                  | <a href="#">#32</a>  | Model consent form and other related documentation given to participants and authorised surrogates                                                                                                                                                                                  | n/a |
| 32 |                                             |                      |                                                                                                                                                                                                                                                                                     |     |
| 33 |                                             |                      |                                                                                                                                                                                                                                                                                     |     |
| 34 | Biological specimens                        | <a href="#">#33</a>  | Plans for collection, laboratory evaluation, and storage of biological specimens for genetic or molecular analysis in the current trial and for future use in ancillary studies, if applicable                                                                                      | n/a |
| 35 |                                             |                      |                                                                                                                                                                                                                                                                                     |     |
| 36 |                                             |                      |                                                                                                                                                                                                                                                                                     |     |
| 37 |                                             |                      |                                                                                                                                                                                                                                                                                     |     |
| 38 |                                             |                      |                                                                                                                                                                                                                                                                                     |     |
| 39 |                                             |                      |                                                                                                                                                                                                                                                                                     |     |

40 The SPIRIT checklist is distributed under the terms of the Creative Commons Attribution License CC-BY-ND  
 41 3.0. This checklist was completed on 19. August 2019 using <https://www.goodreports.org/>, a tool made by the  
 42 [EQUATOR Network](#) in collaboration with [Penelope.ai](#)  
 43  
 44  
 45  
 46  
 47  
 48  
 49  
 50  
 51  
 52  
 53  
 54  
 55  
 56  
 57  
 58  
 59

# BMJ Open

## Acupuncture for Insomnia with Short Sleep Duration: Protocol for a Randomized Controlled Trial

|                                 |                                                                                                                                                                                                                                                                                                                                                                                                                                                                                                                                                                                                                                                                                                                                                                                                                                                                                                                                                                                                                                                                                                                                                                                                                                                                                                                                                                                                                                                                                                                                                                                                                                                                                                                                                                                |
|---------------------------------|--------------------------------------------------------------------------------------------------------------------------------------------------------------------------------------------------------------------------------------------------------------------------------------------------------------------------------------------------------------------------------------------------------------------------------------------------------------------------------------------------------------------------------------------------------------------------------------------------------------------------------------------------------------------------------------------------------------------------------------------------------------------------------------------------------------------------------------------------------------------------------------------------------------------------------------------------------------------------------------------------------------------------------------------------------------------------------------------------------------------------------------------------------------------------------------------------------------------------------------------------------------------------------------------------------------------------------------------------------------------------------------------------------------------------------------------------------------------------------------------------------------------------------------------------------------------------------------------------------------------------------------------------------------------------------------------------------------------------------------------------------------------------------|
| Journal:                        | <i>BMJ Open</i>                                                                                                                                                                                                                                                                                                                                                                                                                                                                                                                                                                                                                                                                                                                                                                                                                                                                                                                                                                                                                                                                                                                                                                                                                                                                                                                                                                                                                                                                                                                                                                                                                                                                                                                                                                |
| Manuscript ID                   | bmjopen-2019-033731.R2                                                                                                                                                                                                                                                                                                                                                                                                                                                                                                                                                                                                                                                                                                                                                                                                                                                                                                                                                                                                                                                                                                                                                                                                                                                                                                                                                                                                                                                                                                                                                                                                                                                                                                                                                         |
| Article Type:                   | Protocol                                                                                                                                                                                                                                                                                                                                                                                                                                                                                                                                                                                                                                                                                                                                                                                                                                                                                                                                                                                                                                                                                                                                                                                                                                                                                                                                                                                                                                                                                                                                                                                                                                                                                                                                                                       |
| Date Submitted by the Author:   | 04-Nov-2019                                                                                                                                                                                                                                                                                                                                                                                                                                                                                                                                                                                                                                                                                                                                                                                                                                                                                                                                                                                                                                                                                                                                                                                                                                                                                                                                                                                                                                                                                                                                                                                                                                                                                                                                                                    |
| Complete List of Authors:       | <p>Wang, Cong; Yueyang Hospital of Integrated Traditional Chinese and Western Medicine, Shanghai University of Traditional Chinese Medicine, Shanghai, China, Department of Acupuncture and Moxibustion</p> <p>Yang, Wen-jia ; Yueyang Hospital of Integrated Traditional Chinese and Western Medicine, Shanghai University of Traditional Chinese Medicine, Department of Acupuncture and Moxibustion,</p> <p>Yu, Xin-tong ; Yueyang Hospital of Integrated Traditional Chinese and Western Medicine, Shanghai University of Traditional Chinese Medicine, Laboratory Center of Medicine</p> <p>Fu, Cong; Yueyang Hospital of Integrated Traditional Chinese and Western Medicine, Shanghai University of Traditional Chinese Medicine, Department of Acupuncture and Moxibustion</p> <p>Li, Jin-jin ; Yueyang Hospital of Integrated Traditional Chinese and Western Medicine, Shanghai University of Traditional Chinese Medicine, Department of Acupuncture and Moxibustion</p> <p>Wang, Jing ; Yueyang Hospital of Integrated Traditional Chinese and Western Medicine, Shanghai University of Traditional Chinese Medicine, Department of Acupuncture and Moxibustion</p> <p>Xu, Wen-lin ; Yueyang Hospital of Integrated Traditional Chinese and Western Medicine, Shanghai University of Traditional Chinese Medicine, Department of Acupuncture and Moxibustion</p> <p>Zheng, Yi-xin ; Yueyang Hospital of Integrated Traditional Chinese and Western Medicine, Shanghai University of Traditional Chinese Medicine, , Department of Acupuncture and Moxibustion</p> <p>Chen, Yun-fei ; Yueyang Hospital of Integrated Traditional Chinese and Western Medicine, Shanghai University of Traditional Chinese Medicine, , Department of Acupuncture and Moxibustion</p> |
| <b>Primary Subject Heading</b>: | Complementary medicine                                                                                                                                                                                                                                                                                                                                                                                                                                                                                                                                                                                                                                                                                                                                                                                                                                                                                                                                                                                                                                                                                                                                                                                                                                                                                                                                                                                                                                                                                                                                                                                                                                                                                                                                                         |
| Secondary Subject Heading:      | Complementary medicine                                                                                                                                                                                                                                                                                                                                                                                                                                                                                                                                                                                                                                                                                                                                                                                                                                                                                                                                                                                                                                                                                                                                                                                                                                                                                                                                                                                                                                                                                                                                                                                                                                                                                                                                                         |
| Keywords:                       | Acupuncture, Insomnia, Short Sleep Duration, Randomized controlled trial, Protocol, Protocols & guidelines < HEALTH SERVICES ADMINISTRATION & MANAGEMENT                                                                                                                                                                                                                                                                                                                                                                                                                                                                                                                                                                                                                                                                                                                                                                                                                                                                                                                                                                                                                                                                                                                                                                                                                                                                                                                                                                                                                                                                                                                                                                                                                       |
|                                 |                                                                                                                                                                                                                                                                                                                                                                                                                                                                                                                                                                                                                                                                                                                                                                                                                                                                                                                                                                                                                                                                                                                                                                                                                                                                                                                                                                                                                                                                                                                                                                                                                                                                                                                                                                                |

1  
2  
3  
4  
5  
6  
7  
8  
9  
10  
11  
12  
13  
14  
15  
16  
17  
18  
19  
20  
21  
22  
23  
24  
25  
26  
27  
28  
29  
30  
31  
32  
33  
34  
35  
36  
37  
38  
39  
40  
41  
42  
43  
44  
45  
46  
47  
48  
49  
50  
51  
52  
53  
54  
55  
56  
57  
58  
59  
60





I, the Submitting Author has the right to grant and does grant on behalf of all authors of the Work (as defined in the below author licence), an exclusive licence and/or a non-exclusive licence for contributions from authors who are: i) UK Crown employees; ii) where BMJ has agreed a CC-BY licence shall apply, and/or iii) in accordance with the terms applicable for US Federal Government officers or employees acting as part of their official duties; on a worldwide, perpetual, irrevocable, royalty-free basis to BMJ Publishing Group Ltd ("BMJ") its licensees and where the relevant Journal is co-owned by BMJ to the co-owners of the Journal, to publish the Work in this journal and any other BMJ products and to exploit all rights, as set out in our [licence](#).

The Submitting Author accepts and understands that any supply made under these terms is made by BMJ to the Submitting Author unless you are acting as an employee on behalf of your employer or a postgraduate student of an affiliated institution which is paying any applicable article publishing charge ("APC") for Open Access articles. Where the Submitting Author wishes to make the Work available on an Open Access basis (and intends to pay the relevant APC), the terms of reuse of such Open Access shall be governed by a Creative Commons licence – details of these licences and which [Creative Commons](#) licence will apply to this Work are set out in our licence referred to above.

Other than as permitted in any relevant BMJ Author's Self Archiving Policies, I confirm this Work has not been accepted for publication elsewhere, is not being considered for publication elsewhere and does not duplicate material already published. I confirm all authors consent to publication of this Work and authorise the granting of this licence.



# Acupuncture for Insomnia with Short Sleep Duration: Protocol for a Randomized Controlled Trial

Cong Wang<sup>1</sup>; Wen-jia Yang<sup>1</sup>; Xin-tong Yu<sup>2</sup>; Cong Fu<sup>1</sup>; Jin-jin Li<sup>1</sup>; Jing Wang<sup>1</sup>;  
Wen-lin Xu<sup>1</sup>; Yi-xin Zheng<sup>1</sup>; Yun-fei Chen<sup>1\*</sup>

1. Department of Acupuncture and Moxibustion, Yueyang Hospital of Integrated Traditional Chinese and Western Medicine, Shanghai University of Traditional Chinese Medicine, Shanghai, China;
2. Laboratory Center of Medicine, Yueyang Hospital of Integrated Traditional Chinese and Western Medicine, Shanghai University of Traditional Chinese Medicine, Shanghai, China;

Address correspondence to: Yun-fei Chen, Yueyang Hospital of Integrated Traditional Chinese and Western Medicine, Shanghai University of Traditional Chinese Medicine, No.110 Ganhe Road, Hongkou District, Shanghai 200437, China. Telephone: 86-021-65162628. Fax: 86-021-65162628; Email: icyf1968@163.com

## Abstract

**Introduction:** Insomnia with short sleep duration has a more serious negative impact on patient health. The existing literature suggests that medication therapy is more effective for this phenotype of insomnia compared to cognitive behavioural therapy (CBT). However, the potential side effects of hypnotic medications hinder their clinical application. Acupuncture has been widely used in the treatment of insomnia, but it remains unclear whether it has therapeutic efficacy for insomnia with short sleep duration. The purpose of this trial is to evaluate the efficacy and safety of acupuncture for insomnia with short sleep duration.

**Methods and analysis:** This study is designed as a randomized, single centre, single-blinded, placebo acupuncture controlled trial involving 152 participants. Eligible patients will be divided into two groups according to the objective total sleep time: insomnia with normal sleep duration group and insomnia with short sleep duration group. Then, patients in each group will be randomly assigned to two subgroups, the treatment group (acupuncture) and the control group (placebo acupuncture), in a 1:1

ratio with 38 subjects in each subgroup. The primary outcome is the Pittsburgh Sleep Quality Index (PSQI) and the Insomnia Severity Index (ISI). Secondary outcomes are actigraphy (ACT), the Beck Anxiety Inventory (BAI), the Beck Depression Inventory (BDI) and the Fatigue Severity Scale (FSS). All adverse effects will be assessed by the Treatment Emergent Symptom Scale. Outcomes will be evaluated at baseline, post-treatment, as well as at 1-week and 1-month follow-up.

**Ethics and dissemination:** This protocol has been approved by the ethics committee of Yueyang Hospital of Integrated Traditional Chinese and Western Medicine (No.: 2019-17). Written informed consent will be obtained from all participants. The results will be disseminated through peer-reviewed journals for publications.

**Registration:** ChiCTR1900023473; Pre-results.

**Keywords** Acupuncture; Insomnia; Short Sleep Duration; Randomized controlled trial; Protocol.

## Article Summary

### Strengths and limitations of this study

1. A randomized, single centre, placebo acupuncture controlled trial with a 2×2 factorial design.
2. The first trial to study the efficacy and safety of acupuncture for insomnia with short sleep duration.
3. Participants will be screened for insomnia at baseline by polysomnography (PSG).
4. Sleep indicators in the actigraphy (ACT) will be used as objective outcomes of patients' sleep quality.
5. One limitation is that this study is implemented in only one center in Chinese subjects and without long-term treatment and follow-up.

## 1. Introduction

In recent years, the incidence of chronic insomnia in adults has become higher <sup>[1]</sup>, and short sleepers are also showing an increasing trend <sup>[2]</sup>. Studies have found that patients with insomnia accompanied by short sleep duration can cause many chronic diseases, such as obesity, diabetes, cardiovascular disease, chronic kidney disease, and hypertension <sup>[3-7]</sup>, and may even result in inadequate hydration <sup>[8]</sup>. Similarly, insomnia patients with short sleep duration will have many adverse effects on their health. Some researchers have found that the mortality rate of insomnia patients is three times more than that of people without insomnia. When patients with insomnia have short sleep duration, the damage to their health will be more serious and the mortality rate will be higher <sup>[9]</sup>.

Based on this, Vgontzas <sup>[10]</sup> proposed that insomnia can be divided into two phenotypes based on objective sleep duration, with the threshold of the total sleep time being 6 h. The first phenotype (short objective sleep duration) is characterized by physiological hyperarousal with numerous medical complications. The second phenotype (normal sleep duration) is characterized by cognitive-emotional disorders, accompanied by a process of cortical excitement and remitting course. Vgontzas also suggested that insomnia with short sleep duration may be less sensitive to CBT-I therapy. Although many guidelines of sleep disorders recommend CBT-I as the primary treatment <sup>[11-13]</sup>, Bathgate et al conducted a trial and concluded that insomnia with short sleep duration has a dull response to CBT-I therapy <sup>[14]</sup>. The short objective sleep duration phenotype has a dull response to CBT-I because of behaviourally based approach aimed at decreasing cognitive–emotional arousal, altering unhealthy sleep-related behaviours and beliefs and changing sleep misperceptions <sup>[15]</sup>. However, the short objective sleep duration phenotype is mainly associated with cortical, and physiological hyperarousal (i.e., short sleep duration and activation of the stress system), and non-remitting course <sup>[10]</sup>. Obviously, CBT-I does not completely solve the symptoms of this phenotype. But it will respond better to treatments that primarily aim at decreasing physiological hyperarousal (e.g., cortisol) and increasing sleep duration,

1  
2  
3  
4 such as medication or other biological treatments [16].

5  
6 Because insomnia with short sleep duration has a dull response to CBT-I treatment,  
7 these patients prefer to take sleep medicine. However, there are many side effects to  
8 benzodiazepine receptor agonists, such as hangover effects, cognitive impairment, and  
9 drug addiction [17-18]. Therefore, many people with insomnia seek complementary and  
10 alternative medicine, such as acupuncture, especially in China [19]. Acupuncture has  
11 been widely used in the treatment of insomnia, and studies have shown that it can  
12 improve sleep efficiency, daytime functioning, psychological health and sleep quality  
13 of insomnia subjects [20-21]. Our previous research also showed that acupuncture has a  
14 good short-term effect on perimenopausal insomnia [22]. An earlier Cochrane review  
15 showed that acupuncture can improve the sleep quality of insomnia subjects compared  
16 with untreated groups and placebo acupuncture groups [23].

17  
18 We hypothesized that individuals with insomnia and short sleep duration, would have  
19 a better treatment response to acupuncture than individuals with insomnia and normal  
20 sleep duration. We made this prediction because some studies have found that insomnia  
21 with objective short sleep duration is associated with activation of the stress system,  
22 especially the activation of the HPA axis, and the group with an objective short sleep  
23 duration had a higher amount of cortisol (COR) compared to the group with normal  
24 sleep duration [16] [24-25]. Previous studies about acupuncture have shown that  
25 acupuncture can regulate the activity of the HPA axis and reduce adrenocorticotrophic  
26 hormone (ACTH), corticotrophin releasing hormone (CRH) and COR levels in  
27 peripheral blood [26-27].

28  
29 According to the theory of TCM, the main causes of insomnia are Yin deficiency  
30 leading to excessive fire, incoordination between the heart and the kidney, disturbance  
31 of heart due to phlegm heat, deficiency of both heart and spleen and liver depression  
32 forming fire [28]. Therefore, we chose acupoints based on disease differentiation and  
33 special acupoints combinations to nourish Yin and drain fire, calm the mind and  
34 regulate mentality. SP 6 (Sanyinjiao) and HT 7 (Shenmen) are adopted as the main  
35 points to nourish Yin and drain fire, especially used to nourish liver and kidney Yin and  
36 decrease heart fire [29]. PC 6 (Neiguan) is the collateral point of the hand-jueyin

1  
2  
3  
4 pericardium meridian, which is also specific acupuncture point of the eight confluent  
5 points. It's used to cool pericardium and restore consciousness [30]. We also use GV20  
6 (Baihui) and Ex-HN 1 (Sishencong) to make the brain-activating and mind-  
7 tranquilizing [31].  
8  
9  
10

11 This is the first rigorous randomized controlled clinical trial to study the therapeutic  
12 effect of acupuncture on insomnia with short sleep duration and compare the effects on  
13 different insomnia phenotypes. Our objectives are as follows: (1) In randomized  
14 controlled trials with a 2×2 factorial design, we will study whether the clinical effect of  
15 acupuncture on chronic insomnia is related to insomnia phenotypes or acupoint effects  
16 and will evaluate both subjective and objective parameters. (2) We will explore the  
17 clinical symptomatic manifestations (difficulty in falling asleep, early awakening,  
18 difficulty in maintaining sleep, etc.) and psychological characteristics (anxiety,  
19 depression, sensitivity, etc.) and analyse the acupuncture effect for these symptoms of  
20 insomnia with short sleep duration.  
21  
22  
23  
24  
25  
26  
27  
28  
29  
30  
31  
32  
33

## 34 **2. Methods**

### 35 **2.1. Study design**

36 This study is a randomized controlled trial with a single-centre, single-blind, 2×2  
37 factorial design and will be completed in Yueyang Hospital of Integrated Traditional  
38 Chinese and Western Medicine affiliated with Shanghai University of Traditional  
39 Chinese Medicine. The study period will be from November 2019 to April 2021, and  
40 the Shanghai Municipal Commission of Health and Family Planning will be the  
41 management organization of the study.  
42  
43  
44  
45  
46  
47  
48  
49

50 Insomnia subjects who meet the inclusion criteria will be divided into two groups  
51 according to the objective total sleep time (TST): insomnia with a short sleep duration  
52 group (objective sleep time < 6 h) and insomnia with a normal sleep duration group  
53 (objective sleep time ≥ 6 h). A total of 76 subjects will be recruited from each group.  
54 Each group will be randomly assigned to the acupuncture subgroup and the placebo  
55 acupuncture subgroup at a 1:1 ratio. The aim of this study is to evaluate the short-term  
56  
57  
58  
59  
60

1  
2  
3  
4 efficacy of acupuncture for the treatment of insomnia with short sleep duration.  
5 According to our previous research, each subject will experience screening, treatment  
6 and a follow-up period of approximately 8 weeks.  
7  
8

9 All subjects will complete the following scales [32]: The Pittsburgh Sleep Quality  
10 Index (PSQI) [33] and the Insomnia Severity Index (ISI) [34-35] will evaluate subjects'  
11 subjective sleep improvement. Subjects will be assessed for the objective total sleep  
12 time by actigraphy [36] in conjunction with a sleep diary [37]. Subjects' mood  
13 improvement will be evaluated by the Beck Anxiety Inventory (BAI) [38] and the Beck  
14 Depression Inventory (BDI) [39]. The Fatigue Severity Scale (FSS) [40] will be used to  
15 assess the improvement in fatigue. The above scales or actigraphy will be evaluated  
16 during the screening period and after the treatment at one-week and one-month follow-  
17 ups (Figure 1). PSG (NIHON KOHDEN, Japan) in this study will be used for screening  
18 purposes only. Subjects will sign the informed consent form after enrolment.  
19  
20  
21  
22  
23  
24  
25  
26  
27  
28  
29  
30  
31  
32  
33  
34  
35  
36  
37  
38  
39  
40  
41  
42  
43  
44  
45  
46  
47  
48  
49  
50  
51  
52  
53  
54  
55  
56  
57  
58  
59  
60

## 2.2. Participants

The study will include 152 insomnia participants. We plan to recruit participants in multiple ways, and the recruitment location will be restricted to Yueyang Hospital of Integrated Traditional Chinese and Western Medicine affiliated with Shanghai University of Traditional Chinese Medicine, Shanghai, China. Our hospital is a comprehensive tertiary hospital with clinical treatment, scientific research and teaching practice. The main source of the subjects will be the outpatients who meet our criteria. In addition, we will also recruit participants through newspapers, social media and advertising. The time limit will be from November 2019 to April 2021. The site of our clinical trial will be the Insomnia Diagnosis and Treatment Center of the Acupuncture and Moxibustion Department at Yueyang Hospital of Integrated Traditional Chinese and Western Medicine affiliated with Shanghai University of Traditional Chinese Medicine. All participants who are willing to participate in the trial will be required to call our research coordinator and arrange an outpatient interview on the first available date.

### 2.2.1. Inclusion criteria

The outpatient interview will be conducted in the form of a semi-structured interview questionnaire, which will contain the cause of insomnia, onset process, treatment process, main sleep complaints, bedtime status, sleep-wake cycle, other sleep-related symptoms, daytime symptoms, mental state, etc. [41]. The inclusion criteria have been developed based on the diagnostic criteria for chronic insomnia in the International Classification of Sleep Disorders (Third Edition) (ICSD-3) [42] developed by the American Academy of Sleep Medicine in 2014. The inclusion criteria are as follows:

- (1) Between 18 and 65 years of age;
- (2) Compliance with the diagnostic criteria for chronic insomnia in ICSD-3;
- (3) Stable administration of sedative-hypnotic drugs for more than 3 months before entering the study or not taking such drugs;
- (4) Meet all of the following: PSQI [33] > 5 points, ISI [34-35] > 14 points, BAI [38] < 45 points and BDI [39] ≤ 28 points;
- (5) Never received acupuncture treatment;

1  
2  
3  
4 (6) Voluntarily participated in the study and signed informed consent.

5 In addition, all participants will complete a one-week sleep actigraphy and diary to  
6 determine their sleep patterns and objective sleep duration before enrolment [43]. We  
7 will recruit 76 subjects in each group (insomnia with short sleep duration and insomnia  
8 with normal sleep duration). If one group completes recruitment first, that specific  
9 group will stop recruiting.  
10  
11  
12  
13

### 14 **2.2.2. Exclusion criteria**

15 The exclusion criteria are as follows:

- 16 (1) Severe hepatic and renal function damage, as well as haematologic diseases and  
17 respiratory diseases and diagnosis of mental disorders according to the Diagnostic  
18 and Statistical Manual of Mental Disorders (DSM-V) [44];
  - 19 (2) Semi-structured clinical interviews determine subjects have other sleep disorders  
20 rather than primary insomnia;
  - 21 (3) Infectious diseases such as infectious hepatitis, tuberculosis, AIDS, and syphilis;
  - 22 (4) Severe digestive system diseases and severe malnutrition;
  - 23 (5) Pregnant or lactating;
  - 24 (6) Severe trauma with no cure or not suitable for acupuncture, such as allergic  
25 constitution and severe dermatosis;
  - 26 (7) An apnoea–hypopnea index (AHI) >10 or periodic limb movements index during  
27 sleep associated with >15 arousals per hour on diagnostic PSG [45];
  - 28 (8) Participated in other clinical trials in the last 3 months.
- 29  
30  
31  
32  
33  
34  
35  
36  
37  
38  
39  
40  
41  
42  
43  
44  
45

### 46 **2.3. Interventions**

47 The acupuncturist for this study has received a master's degree in acupuncture and  
48 tuina at Shanghai University of Traditional Chinese Medicine, has 8 years of training  
49 experience, has obtained a doctor qualification certificate, and has 3 years of clinical  
50 work experience. All study participants will receive 10 days of training prior to the start  
51 of the trial to become more familiar with the process.  
52  
53  
54  
55  
56  
57

58 The subjects in the acupuncture group will be placed in the supine position. We have  
59 selected 5 acupoints for this study: GV20 (Baihui), PC 6 (Neiguan), SP 6 (Sanyinjiao),  
60



1  
2  
3  
4 HT 7 (Shenmen) and Ex-HN 1 (Sishencong). The reason for choosing these acupoints  
5 is the previous systematic review <sup>[46-47]</sup> and our clinical experience. A disposable sterile  
6 stainless steel acupuncture needle with a length of 40 mm and a diameter of 0.25 mm  
7 will be used (Andy, Guizhou, China). The acupuncturist will take the points on both  
8 sides of the body. The needle will be inserted into the skin to a depth of 10-20 mm,  
9 which is determined by the acupuncturist according to body type (high or short, fat or  
10 thin). After piercing, a thrusting and twirling of the needle will be performed to induce  
11 the sensation of “De qi”, and the needle will be left for 20 minutes <sup>[48]</sup>. “De qi” means  
12 that after the needle has penetrated into the acupoint to a certain depth, the needle is  
13 thrust and twirled to cause the acupoint to obtain the induction of meridian qi. The  
14 subjects will have a self-conscious reaction such as soreness, heaviness or distention.  
15 This is the key process in acupuncture treatment <sup>[49]</sup>.

16  
17  
18  
19  
20  
21  
22  
23  
24  
25  
26  
27  
28  
29  
30  
31  
32  
33  
34  
35  
36  
37  
38  
39  
40  
41  
42  
43  
44  
45  
46  
47  
48  
49  
50  
51  
52  
53  
54  
55  
56  
57  
58  
59  
60  
Subjects who entered the control group will receive a placebo acupuncture treatment  
by using a non-invasive placebo needle <sup>[50]</sup> with the same acupoints as the treatment  
group. The Streitberger needle has been widely used in clinical research on placebo  
acupuncture treatment of insomnia <sup>[22,51-52]</sup>, and studies have shown that using this  
needle in a placebo acupuncture group is reliable for the Chinese population <sup>[53]</sup>. Since  
the Streitberger needles will be in place for 20min, they will need to be firmly affixed  
to the skin or scalp. We have modified the procedure by using surgical tape (or hairpins  
in hairy regions) to hold the needles in place. This enables the needles to be applied in  
hairy regions and different needling directions to be attempted. Such a method has been  
adopted by many other researchers <sup>[54]</sup>.

Subjects from both the treatment group and the control group will be treated  
equally by the physician to prevent them from perceiving the difference. They will be  
informed about the acupuncture as follows: “In this study, different types of  
acupuncture treatment will be compared. One type is the usual acupuncture, and the  
other is associated with positive outcomes in previous clinical studies <sup>[55]</sup>.” And subjects  
in both groups will be treated three times per week for 10 times by the same  
acupuncturist.

## 2.4. Outcome measures

### 2.4.1. Primary outcome measures

The PSQI consists of 19 self-evaluation items and 5 other evaluation items. The self-assessment items assess sleep quality, fall asleep time, total sleep time, sleep efficiency, concomitant symptoms, hypnotic drugs, and daytime functions. The total score is 0-21 points. Higher scores indicate worse sleep quality and more severe sleep disorders [33]. The PSQI is widely used in the clinic to assess sleep dysfunction [56], and it is more likely to assess an individual's sleep state on weekdays [57]. A total score > 5 indicates a need for clinical treatment [58]. The Chinese version of the PSQI has a high degree of reliability and validity for the Chinese population and can be used as an effective tool for sleep screening and evaluation in clinical and scientific research [59-60].

The ISI mainly evaluates the insomnia nature, insomnia severity, and effects of daytime function on patients. The scale is simple and easy to implement. It consists of 7 evaluation items with a total score of 0-28. The higher the score, the more serious the degree of insomnia [35]. It is mainly used for the screening of patients with insomnia and the evaluation of a therapeutic effect in clinical studies [61]. A total score of 8-14 indicates subclinical insomnia, and a total score > 14 indicates clinical insomnia. A change score of -8.4 points is associated with moderate improvement as rated by an independent assessor after treatment in the clinical sample [35, 62]. The Chinese version of the ISI is used in China's population assessment for insomnia with high reliability and validity [63].

### 2.4.2. Secondary outcome measures

The secondary outcome measures consist of (1) changes in the number of awakenings (NOA), total wake time (TWT), total sleep time (TST), and sleep efficiency (SE) measured by actigraphy before and after treatment; (2) changes in BAI, BDI, and FSS scores after treatment and during follow-up compared with before treatment; (3) changes in sleep onset latency (SOL), total wake time (TWT), total sleep time (TST), sleep efficiency (SE), and middle of the night wake after sleep onset (MWASO) from the sleep diary after treatment compared with those before treatment (Table 1).

ACT evaluates the body state by measuring the body movement by wearing a motion

1  
2  
3  
4 sensor on the non-dominant wrist. It can be used as one of the objective indicators for  
5 evaluating sleep-wake state <sup>[36]</sup>. The motion watch 8 wrist ACT produced by CamNtech  
6 Ltd will be used in this study. Its acceleration sensitivity is <0.01 g, with 5 s as the  
7 analysis unit. The recorded sleep and activity data will be analysed by the  
8 corresponding MotionWare Software. The main parameters include sleep-wake  
9 parameters and rest-activity parameters. It can satisfactorily evaluate the four sleep  
10 indicators: number of awakenings, wake time after sleep onset, total sleep time, and  
11 sleep efficiency percentage <sup>[64]</sup>. Early studies have shown that ACT has a good fit to  
12 polysomnography (PSG) in assessing sleep and wakefulness ( $R_s = 0.52-0.71$ ) and has  
13 a good sensitivity as an index of effect evaluation in insomnia treatment <sup>[65-66]</sup>. In this  
14 study, we will use ACT combined with a sleep diary <sup>[37]</sup> to record the sleep of the  
15 subjects for one continuous week. Changes in the number of awakenings (NOA), total  
16 wake time (TWT), total sleep time (TST), and sleep efficiency (SE) will be measured  
17 before and after treatment.  
18  
19  
20  
21  
22  
23  
24  
25  
26  
27  
28  
29

30  
31 The BAI, which was developed by Beck in 1988 <sup>[67]</sup>, contains a total of 21 different  
32 anxiety symptom items. It is used to evaluate the anxiety state of a subject in the past  
33 week. The higher the score, the more serious the degree of anxiety. Generally,  $BAI \geq$   
34 45 is used as the criterion for positive anxiety. The scale is simple in content, easy in  
35 operation, and clear in understanding. The Chinese version has good reliability and  
36 validity. It is a commonly used measurement tool for anxiety symptom assessment in  
37 the Chinese population <sup>[68]</sup>.  
38  
39  
40  
41  
42  
43  
44

45 The BDI is based on the diagnostic criteria for depression in the fourth edition of the  
46 Diagnostic and Statistical Manual of Mental Disorders. The first version was published  
47 in 1961 and revised to the current version by Beck et al. The scale has a total of 21  
48 items that are used to evaluate the severity of a subject's depression over the past week.  
49 The higher the total score is, the more severe the depression. A total score of 0-13 is  
50 known as no depression, 14-19 as mild depression, 20-28 as moderate depression and  
51 29-63 as major depression. The Chinese version has been tested and proven to have  
52 good reliability and validity <sup>[69]</sup>.  
53  
54  
55  
56  
57  
58  
59

60 The FSS <sup>[40]</sup> was formulated by Krupp in 1989. The scale has a total of 9 items and

1  
2  
3  
4 is simple and easy to perform. A higher score indicates more severe fatigue. In insomnia  
5 patients, the FSS threshold is 5.5 points, and a high score represents the impaired  
6 daytime functional status of insomnia patients [70]. The Chinese version of this scale has  
7  
8 been determined to have good reliability and validity [71].  
9  
10

### 11 **2.4.3. Safety assessments**

12  
13 Safety will be assessed by routine blood test, renal function test and liver function  
14 test. These indicators are detected during the period of screening and after the treatment.  
15 We will still count the events during the trial through a list of adverse events. We will  
16 specifically evaluate them during the assessment phase [72] (Table 1). Adverse events  
17 will be defined as any adverse medical reactions that occurred from the time the subject  
18 signed the informed consent form to the time of the last follow-up, whether or not there  
19 is a causal relationship with the study treatment. Subjects are required to fill in the list  
20 of adverse events, which should record the time point, severity, measures taken,  
21 whether they are related to the treatment and prognosis. During the assessment phase,  
22 researchers will assess the possible relationship between adverse events and the study,  
23 as well as the combined medications. Adverse events include all adverse reactions that  
24 are definitely related to treatment, most likely related to treatment and likely related to  
25 treatment.  
26  
27  
28  
29  
30  
31  
32  
33  
34  
35  
36  
37  
38  
39  
40  
41  
42  
43  
44  
45  
46  
47  
48  
49  
50  
51  
52  
53  
54  
55  
56  
57  
58  
59  
60

| Week                                      | 0        | 1               | 2 | 3 | 4               | 8 |
|-------------------------------------------|----------|-----------------|---|---|-----------------|---|
|                                           | Baseline | Treatment phase |   |   | Follow-up phase |   |
| PATIENTS                                  |          |                 |   |   |                 |   |
| Telephone reservation                     | ×        |                 |   |   |                 |   |
| Enrolment                                 | ×        |                 |   |   |                 |   |
| Sign informed consent                     | ×        |                 |   |   |                 |   |
| Clinical interview                        | ×        |                 |   |   |                 |   |
| Sleep scales                              | ×        |                 |   |   |                 |   |
| Physical examination                      | ×        |                 |   |   | ×               |   |
| Laboratory test                           | ×        |                 |   |   | ×               |   |
| PSG                                       | ×        |                 |   |   |                 |   |
| GROUPS                                    |          |                 |   |   |                 |   |
| Acupuncture group (normal sleep duration) |          |                 |   |   | Ten treatments  |   |
| Control group (normal sleep duration)     |          |                 |   |   | Ten treatments  |   |
| Acupuncture group (short sleep duration)  |          |                 |   |   | Ten treatments  |   |
| Control group (short sleep duration)      |          |                 |   |   | Ten treatments  |   |
| OUTCOME MEASUREMENT                       |          |                 |   |   |                 |   |
| PSQI                                      | ×        |                 |   |   | ×               | × |
| ISI                                       | ×        |                 |   |   | ×               | × |
| ACT                                       | ×        |                 |   |   | ×               |   |
| BAI                                       | ×        |                 |   |   | ×               |   |
| BDI                                       | ×        |                 |   |   | ×               |   |
| FSS                                       | ×        |                 |   |   | ×               |   |
| Sleep diary                               | ×        | ×               | × | × | ×               |   |
| Success of subject-blinding test          |          |                 |   |   | ×               |   |
| Adverse events                            |          |                 |   |   |                 |   |
| Reasons for dropouts or withdrawals       |          | ×               | × | × | ×               | × |
| Patient's compliance                      |          |                 |   |   | ×               | × |

Note:

ACT: Actigraphy

BAI: Beck Anxiety Inventory

BDI: Beck Depression Inventory

FSS: Fatigue Severity Scale

ISI: Insomnia Severity Index

PSG: Polysomnography

PSQI: Pittsburgh Sleep Quality Index

Table 1. Trial processes chart

## 2.5. Sample size

According to previous literature [22], placebo acupuncture reduced the PSQI of chronic insomnia to 14.76 after treatment, and the standard deviation was 3.35. We hypothesize that the true acupuncture in our study could reduce the PSQI score by 2.2 points compared with the placebo acupuncture, and the standard deviation of 2.93 was taken from the previous research results. According to the needs of this study, we made  $\alpha=0.05$  and  $1-\beta=0.90$ , according to the formula [73]:

$$n = \psi^2 (\sum S_i^2 / g) / [\sum (\bar{X}_i - \bar{X})^2 / (g - 1)]$$

$\bar{X}_1=12.56$ ,  $S_1=2.93$ ,  $\bar{X}_2=14.76$ ,  $S_2=3.35$ ,  $\bar{X}_3=12.56$ ,  $S_3=2.93$ ,  $\bar{X}_4=14.76$ ,  $S_4=3.35$ , and  $\bar{X}=13.66$ ; by looking up the table,  $\psi=2.17$ . Calculating the sample size of each group:  $n=30.92 \approx 31$ ; considering the loss factor (according to a 20% loss rate), the number of samples in each group is 38 cases, and the total number of samples in the 4 subgroups is 152 cases.

## 2.6. Randomization and blinding

The statistician outside the study will use SPSS 25.0 to generate two different sets of random numbers lists with 76 numbers in each. The random numbers in each list will be arranged in ascending order, with No. 1-38 for the control group and 39-76 for the acupuncture group. Subjects will enter the control group or the acupuncture group according to the random numbers corresponding to the order of signing the informed consent in a ratio of 1:1.

Random numbers and treatment protocols will be printed on the subject's treatment card and placed in an opaque envelope by an independent investigator. Each enrolled subject will be assigned to an order number and receive an envelope with their name on it. The acupuncturist will check whether the envelope was sealed and will open and remove the treatment card. During the trial, the generation of a random numbers list, subjects' recruitment, acupuncture treatment, outcome measures assessment, and follow-up will be performed independently by different researchers. Only the outside assistant and the acupuncturist will be aware of the allocation. Participants and other

1  
2  
3  
4 relevant researchers will be blinded to the allocation.

5 The success of subject-blinding will be assessed by, at the end of the last treatment  
6 session, asking the subject if they believe they are receiving active treatment.  
7  
8  
9

## 10 11 **2.7 Data Collection and Management**

12  
13 Data will be collected at the baseline (one week before the first intervention), post  
14 intervention (at the end of intervention), one-week follow-up and one-month follow-  
15 up. Each visit will comprise three assessments: (1) subjects will complete sleep-related  
16 questionnaires independently in a private conference room at Yueyang Hospital of  
17 Integrated Traditional Chinese and Western Medicine, Shanghai University of  
18 Traditional Chinese Medicine. Completion of the questionnaires will require  
19 approximately 30 min; during this time, outcomes assessors will be available to answer  
20 questions; (2) subjects will complete a sleep diary at home under the guidance of  
21 outcome assessors; (3) subjects will undergo one-night PSG at the baseline, ACT before  
22 and after the intervention. Outcome assessors will be trained to promote participant  
23 retention, collect good quality data and complete follow-up. Data analysts will be  
24 trained on data entry, coding, security and storage. Statisticians in the research team  
25 will provide training on data assessment and analysis. Maintenance of participant  
26 confidentiality will be involved: (1) asking subjects only share personal and study-  
27 related information during our study; (2) storing data in the password-protected files on  
28 a designated specific computer with restricted access; (3) only the research-related  
29 person have access to personal identifiable information, which will be destroyed once  
30 the study is completed. Technical appendix, statistical code, and dataset available from  
31 the ResMan ([www.medresman.org](http://www.medresman.org)).  
32  
33  
34  
35  
36  
37  
38  
39  
40  
41  
42  
43  
44  
45  
46  
47  
48  
49

50 Subjects may withdraw from the study at any time for any reason. If any subject  
51 wishes to withdraw, the clinician will ask if they are willing to complete the final  
52 assessment and record the time of the last treatment. The incidence of withdrawal and  
53 loss to follow-up will be recorded and reported. We will also inquire the subjects about  
54 the reasons for absence, and will record compliance by the clinician.  
55  
56  
57  
58  
59  
60

## 2.8 Statistics and Analysis

The statistics and analysis of all data will be performed by two analytical researchers independent of the trial. Intention-to-treat (ITT) and per-protocol (PP) analysis will be used as evaluation methods to evaluate the final results of this study. Among them, ITT analysis will be used as the main analytical method. The multiple imputation method will be the primary method for processing the missing data, and an observation carried forward method will also apply to sensitivity analysis [74]. Data from dropout cases will be managed by both ITT analysis and PP analysis.

SPSS 25.0 will be used for statistical analysis. For the measurement data that conform to the normal distribution and homogeneous variance, the mean  $\pm$  standard deviation will be used to describe the discrete tendency and central tendency. The comparison between the two groups will be performed by independent-samples t test. The comparison of multiple time points will be based on repeated measurement data combined with multivariate analysis of variance. Measurement data that do not conform to the normal distribution will be described by median, minimum, and maximum. The Mann-Whitney U rank sum test will be used for comparison between the two groups. The intra-group comparison will be based on the Friedman(F) rank sum test of the relevant samples.

The enumeration data will be expressed by frequency and constituent ratio. If the analysis index is two-category and multi-category unordered data, the comparison between groups will be performed by  $\chi^2$  test. If the analysis index is hierarchical order enumeration data, the Mann-Whitney U rank sum test will be used for the intra-group comparison.

All statistical tests will be performed on a two-sided test, and  $P \leq 0.05$  will be considered statistically significant.

## 3. Discussion

Some scholars have suggested that insomnia can be divided into two phenotypes



1  
2  
3  
4 based on objective sleep duration, namely, insomnia with short sleep duration and with  
5 normal sleep duration. The former is an important phenotype of insomnia and has more  
6 serious health hazards [3-9]. At present, the treatment of insomnia tends to be biologically  
7 based (represented by benzodiazepine receptor agonists) and behaviourally based  
8 (represented by CBT-I). Most of the diagnosis and treatment guidelines of sleep  
9 disorders recommend CBT-I as the primary choice for treatment of insomnia and drug  
10 therapy as the secondary choice [11-13]. However, studies have shown that patients with  
11 insomnia with a short sleep duration are not sensitive to CBT-I treatment [14], these  
12 patients prefer to take sleep medicine. However, drug therapy has many adverse  
13 reactions, such as hangover effects, cognitive impairment and drug addiction [17-18]. It  
14 is important to seek safe and effective complementary and alternative medicine with  
15 few side effects. This is the basis of our research. Acupuncture treatment for insomnia  
16 provides such an opportunity.

17  
18  
19  
20  
21  
22  
23  
24  
25  
26  
27  
28  
29 In this study, our first purpose is to determine whether acupuncture has a therapeutic  
30 effect on insomnia compared with the placebo acupuncture group. Second, we will  
31 determine whether acupuncture has a curative effect on insomnia with short sleep  
32 duration. Finally, we will examine whether acupuncture treatment for two phenotypes  
33 of insomnia has a difference in efficacy.

34  
35  
36  
37  
38  
39 In fact, past studies have not completely found a reliable method to properly define  
40 the insomnia phenotype, which is largely due to the lack of biomarkers for insomnia or  
41 objective indicators that can be used for classification. Some clinical practice guidelines  
42 do not recommend PSG as a diagnostic tool and a severity assessment tool for insomnia  
43 [75]. However, an increasing number of studies have shown that the use of objective  
44 sleep assessment tools to classify insomnia has a great effect on the analysis of many  
45 potential disease incidences [9-10,76]. This study provides further support for the use of  
46 an objective sleep index to help diagnose and treat the specific phenotypes of insomnia.

47  
48  
49  
50  
51  
52  
53  
54 This study used actigraphy as a sleep time measurement tool and an objective  
55 assessment tool for sleep without introducing the PSG. Compared with actigraphy, PSG  
56 requires a bed rest time of approximately 8 h, but actigraphy does not have this  
57 limitation. By reviewing the previous literature comparing the differences between the  
58  
59  
60

1  
2  
3  
4 two measurement tools [65-66,77-78], actigraphy has a good fit to PSG in assessing the time  
5 of sleep and wakefulness in insomnia patients. However, to a certain extent, actigraphy  
6 is more likely to underestimate sleep maintenance time and overestimate the total  
7 arousal time, which may result in some of the subjects with a total sleep time > 6 h  
8 being included in the group of patients with insomnia with short sleep duration.  
9  
10  
11  
12  
13  
14  
15  
16  
17  
18  
19  
20  
21  
22  
23  
24  
25  
26  
27  
28  
29  
30  
31  
32  
33  
34  
35  
36  
37  
38  
39  
40  
41  
42  
43  
44  
45  
46  
47  
48  
49  
50  
51  
52  
53  
54  
55  
56  
57  
58  
59  
60

two measurement tools [65-66,77-78], actigraphy has a good fit to PSG in assessing the time of sleep and wakefulness in insomnia patients. However, to a certain extent, actigraphy is more likely to underestimate sleep maintenance time and overestimate the total arousal time, which may result in some of the subjects with a total sleep time > 6 h being included in the group of patients with insomnia with short sleep duration. However, first, the gap is small. Second, the conclusions of these differences under this inclusion criterion may represent a greater actual difference between the two phenotypes. In addition, using one-night PSG to evaluate the subject's objective sleep time has a first-night effect. Therefore, we chose a week of actigraphy data to assess the objective indicators. Moreover, previous studies have shown that actigraphy can be used as a useful and efficient tool to assess the sleep patterns of individuals in their own sleep environment [79-80].

The use of placebo control in acupuncture trials remains controversial [81]. In pharmacological treatment trials, an ideal placebo should be indistinguishable from the true interventions and be physiologically inert [82]. However, it remains a challenge to design an adequate placebo for non-pharmacological interventions, such as acupuncture, in which non-specific treatment will be exists in the placebo group [83]. Since placebo acupuncture can produce a significant non-specific therapeutic effects, there is little space left for the assumed specific effect of acupuncture [84]. Therefore, we expect that in the future research work, researchers will invent a more authoritative placebo acupuncture.

This study is the first trial to use acupuncture as an intervention to treat different phenotypes of insomnia. Our conclusions will expand the research results of previous studies and will further explain that insomnia with short objective sleep duration is a biologically more serious insomnia phenotype. These patients require more specific attention and more specific treatment options.

## Acknowledgements

The authors thank Mrs Cong-quan Yin and Pro Xiao-peng Ma for their comments and

1  
2  
3  
4 suggestions on the protocol.  
5  
6  
7

## 8 **Author Contributions**

9  
10 CW and YFC conceived the research plan. CW and WJY drafted the protocol. XTY,  
11 CF, JYL and JW coordinated the study. WLX, YXZ and CW recruited the subjects. CW  
12 and WJY formed the analysis plan. All authors participated in, read and approved the  
13 final manuscript.  
14  
15  
16  
17  
18  
19  
20

## 21 **Funding**

22  
23 This work was supported by: The Construction of Chinese Medicine Heritage  
24 Innovation Platform (Project No.: ZY (2018-2020)-CCCX-2004-03); The Shanghai  
25 Science and Technology Commission (Project No.: 18401971000); The Shanghai  
26 Municipal Commission of Health and Family Planning (Project No.:  
27 ZYKC201703006); The National Natural Science Funds of China (Grant No.  
28 81503631); The Interdisciplinary Project of “Clinical Immunology of Traditional  
29 Chinese Medicine” in Shanghai (Project No.: 30304113598).  
30  
31  
32  
33  
34  
35  
36

37 This funding source had no role in the design of this study and will not have any role  
38 during its execution, analyses, interpretation of the data, or decision to submit results.  
39  
40  
41  
42  
43

## 44 **Competing interests**

45 None declared.  
46  
47  
48  
49  
50

## 51 **Patient and public involvement**

52 Patients' priorities, experience and preferences were not involved in development of  
53 the research question and outcome measures, the design of this study, or the recruitment  
54 to and conduct of the study. The results will be not disseminated to study participants.  
55  
56  
57  
58  
59  
60

## Ethics approval

The trial has been approved by the ethics committee of Yueyang Hospital of Integrated Traditional Chinese and Western Medicine (No.: 2019-17).

## Provenance and peer review

Not commissioned; externally peer reviewed.

## References

- [1] Suh S, Cho N, Zhang J. Sex Differences in Insomnia: from Epidemiology and Etiology to Intervention. *Curr Psychiatry Rep.* 2018 ;20(9):69.
- [2] Knutson KL, Van Cauter E, Rathouz PJ, et al. Trends in the prevalence of short sleepers in the USA: 1975-2006. *Sleep.* 2010; 33(1): 37–45.
- [3] Dashti HS, Scheer FAJL, Jacques PF, et al. Short Sleep Duration and Dietary Intake: Epidemiologic Evidence, Mechanisms, and Health Implications. *Adv Nutr.* 2015;6(6):648-659.
- [4] Ayas NT, White DP, Al-Delaimy WK, et al. A Prospective Study of Self-Reported Sleep Duration and Incident Diabetes in Women. *Diabetes Care.* 2003;26(2):380-384.
- [5] Tobaldini E, Fiorelli EM, Solbiati M, et al. Short sleep duration and cardiometabolic risk: from pathophysiology to clinical evidence. *Nat Rev Cardiol.* 2018; doi: 10.1038/s41569-018-0109-6.
- [6] Li J, Huang Z, Hou J, et al. Sleep and CKD in Chinese Adults: A Cross-Sectional Study. *Clin J Am Soc Nephrol.* 2017; 12(6):885-892.
- [7] Vgontzas AN, Liao D, Bixler EO, et al. Insomnia with objective short sleep duration is associated with a highrisk for hypertension. *Sleep.* 2009; 32:491–497.
- [8] Rosinger AY, Chang AM, Buxton O, et al. Short sleep duration is associated with inadequate hydration: Cross-cultural evidence from US and Chinese adults, *Sleep*, 2018 Nov 5. doi: 10.1093/sleep/zsy210. [Epub ahead of print]
- [9] Sivertsen B, Pallesen S, Glozier N, et al. Midlife insomnia and subsequent mortality: The Hordaland health study. *BMC Public Health.* 2014;14: 720.

- 1  
2  
3  
4 [10] Vgontzas AN, Fernandez-Mendoza J. Insomnia with short sleep duration: nosological,  
5 diagnostic, and treatment implications. *Sleep MedClin*. 2013; 8(3): 309–322.  
6  
7 [11] Qaseem A, Kansagara D, Forcica MA, et al. Management of Chronic Insomnia Disorder  
8 in Adults: A Clinical Practice Guideline from the American College of Physicians. *Ann Intern*  
9 *Med*. 2016; 165(2):125-133.  
10  
11 [12] Dieter Riemann, Chiara Baglioni, Claudio Bassett, European guideline for the diagnosis  
12 and treatment of insomnia. *European Sleep Research Society*. 2017; 26(6):675-700.  
13  
14 [13] Chinese Sleep Research Society. Guidelines for diagnosis and treatment of insomnia in  
15 China. *Natl Med J China*. 2017; 97(24): 1844-1856.  
16  
17 [14] Bathgate CJ, Edinger JD, Krystal AD. Insomnia Patients with Objective Short Sleep  
18 Duration Have a Blunted Response to Cognitive Behavioral Therapy for Insomnia. *Sleep*. 2017;  
19 40(1). doi: 10.1093/sleep/zsw012.  
20  
21 [15] Trauer JM, Qian MY, Doyle JS, Rajaratnam SM, Cunnington D. Cognitive behavioral  
22 therapy for chronic insomnia: a systematic review and meta-analysis. *Ann Intern Med*. 2015;  
23 163(3): 191–204.  
24  
25 [16] Vgontzas AN, Fernandez-Mendoza J, Liao D, Bixler EO. Insomnia with objective short  
26 sleep duration: the most biologically severe phenotype of the disorder. *Sleep Med Rev*. 2013;  
27 17: 241-254.  
28  
29 [17] Buscemi N, Vandermeer B, Friesen C, et al. The efficacy and safety of drug treatments for  
30 chronic insomnia in adults: a meta-analysis of RCTs. *J Gen Intern Med*. 2007;22(9): 1335–  
31 1350.  
32  
33 [18] Akemi Miyata, Kunihiro Iwamoto, Naoko Kawano, et al. The effects of acute treatment  
34 with ramelteon, triazolam, and placebo on driving performance, cognitive function, and  
35 equilibrium function in healthy volunteers. *Psychopharmacology*. 2015; 232(12): 2127-37.  
36  
37 [19] China Sleep Research Association. Guidelines for the diagnosis and treatment of insomnia  
38 in China. *National Medical Journal of China*. 2017; 97(24): 1844-1856.  
39  
40 [20] Sarris J, Byrne GJ. A systematic review of insomnia and complementary medicine. *Sleep*  
41 *Med Rev*. 2011; 15(2):99-106.  
42  
43 [21] Yin X, Gou M, Xu J, et al. Efficacy and safety of acupuncture treatment on primary  
44 insomnia: a randomized controlled trial. *Sleep Med*. 2017; 37:193-200.  
45  
46  
47  
48  
49  
50  
51  
52  
53  
54  
55  
56  
57  
58  
59  
60

- 1  
2  
3  
4 [22] Fu C, Zhao N, Liu Z. Acupuncture Improves Peri-menopausal Insomnia: A Randomized  
5 Controlled Trial. *Sleep*. 2017;40(11). doi: 10.1093/sleep/zsx153.  
6  
7 [23] Cheuk DK, Yeung WF, Chung KF, et al. Acupuncture for insomnia. *Cochrane Database*  
8 *Syst Rev*. 2012; (9): CD005472.  
9  
10 [24] Vgontzas AN, Tsigos C, Bixler EO, et al. Chronic insomnia and activity of the stress  
11 system: a preliminary study. *J Psychosom Res*. 1998; 45:21-31.  
12  
13 [25] Vgontzas AN, Bixler EO, Lin HM, Prolo P, Mastorakos G, Vela-Bueno A, et al. Chronic  
14 insomnia is associated with nyctohemeral activation of the hypothalamic-pituitary-adrenal axis:  
15 clinical implications. *J Clin Endocrinol Metab*. 2001; 86:3787-3794.  
16  
17 [26] Wei Y, Dong M, Zhong L, et al. Regulation of hypothalamic-pituitary-adrenal axis activity  
18 and immunologic function contributed to the anti-inflammatory effect of acupuncture in the  
19 OVA-induced murine asthma model. *Neurosci Lett*. 2017; 636:177-183.  
20  
21 [27] WU Xue-fen, ZHENG Xue-na, GUO Xin, et al. Research Progress of HPA - related  
22 Hormones Improving Sleep by Acupuncture Intervention. *JCAM*. 2017;33(8):69-71.  
23  
24 [28] Chen JM. Zang Xiang Theory. In: *Traditional Chinese Medicine*. Shanghai: Shanghai  
25 Medical University;1985.  
26  
27 [29] Feng SW, Zeng F, Ren YL, et al. Discussion on disease spectrum treated with acupuncture  
28 at shenmen (HT 7) and its compatibility based on bibliometrics. *Zhongguo Zhen Jiu*.  
29 2014;34(6):561-564.  
30  
31 [30] Kim YS, Lee SH, Jung WS, et al. Intradermal acupuncture on shen-men and nei-kuan  
32 acupoints in patients with insomnia after stroke. *Am J Chin Med*. 2004;32(5):771-778.  
33  
34 [31] da Silva JB, Nakamura MU, Cordeiro JA, et al. Acupuncture for insomnia in pregnancy--  
35 a prospective, quasi-randomised, controlled study. *Acupuncture in Medicine*. 2004, 22(2):60-  
36 67.  
37  
38 [32] Buysse DJ, Ancoli-Israel S, Edinger JD, et al. Recommendations for a standard research  
39 assessment of insomnia. *Sleep*.2006;29(9):1155-1173.  
40  
41 [33] Buysse DJ, Reynolds CF, Monk TH, et al. The Pittsburgh Sleep Quality Index (PSQI): A  
42 new instrument for psychiatric research and practice. *Psychiatry Res*. 1989; 28:193-213.  
43  
44 [34] Morin CM. *Insomnia: Psychological assessment and management*. New York-London:  
45 The Guilford Press; 1993.  
46  
47  
48  
49  
50  
51  
52  
53  
54  
55  
56  
57  
58  
59  
60

- 1  
2  
3  
4 [35] Bastien CH, Vallières A, Morin CM. Validation of the Insomnia Severity Index as an  
5 outcome measure for insomnia research. *Sleep Med.* 2001;2(4): 297–307.  
6  
7 [36] Ancoli-Israel S. Actigraphy. In: Kryger MH, Roth T, Dement WC, eds. Principles and  
8 practice of sleep medicine, fourth edition. 4th ed. Philadelphia, PA: Saunders; 2005:1459-1467.  
9  
10 [37] Sateia MJ. Epidemiology, consequences, and evaluation of insomnia. In: Lee-Chiong TL,  
11 Sateia MJ, Carskadon MA, eds. *Sleep Medicine*. Philadelphia, PA: Hanley and Belfus; 2002:  
12 151-160.  
13  
14 [38] Manne S, Nereo N, DuHamel K, et al. Anxiety and depression in mothers of children  
15 undergoing bone marrow transplant: symptom prevalence and use of the Beck depression and  
16 Beck anxiety inventories as screening instruments. *J Consult Clin Psychol.* 2001;69(6):1037-  
17 1047.  
18  
19 [39] Beck AT, Steer RA, Ball R, et al. Comparison of Beck Depression Inventories -IA and -II  
20 in psychiatric outpatients. *J Pers Assess.* 1996;67:588-597.  
21  
22 [40] Krupp LB, LaRocca NG, Muir-Nash J, et al. The fatigue severity scale: Application to  
23 patients with multiple sclerosis and systemic lupus erythematosus. *Arch Neurol.* 1989;  
24 46:1121-1123.  
25  
26 [41] Schutte-Rodin S, Broch L, Buysse D, et al. Clinical guideline for the evaluation and  
27 management of chronic insomnia in adults. *J Clin Sleep Med.* 2008;4(5):487-504.  
28  
29 [42] Michael Sateia. American Academy of Sleep Medicine. International Classification of  
30 Sleep Disorders (Third Edition). USA: American Academy of Sleep Medicine. 2014; 3rd ed.  
31  
32 [43] Ibáñez V, Silva J, Cauli O. A survey on sleep questionnaires and diaries. *Sleep Med.* 2018;  
33 42:90-96.  
34  
35 [44] APA. Diagnostic and statistical manual of mental disorders: DSM- V. Washington (DC):  
36 American Psychiatric Publishing; 2013.  
37  
38 [45] Yeung WF, Chung KF, Zhang SP, et al. Electroacupuncture for primary insomnia: a  
39 randomized controlled trial. *Sleep.* 2009; 32(8):1039–1047.  
40  
41 [46] Huang W, Kutner N, Bliwise DL. A systematic review of the effects of acupuncture in  
42 treating insomnia. *Sleep Med Rev.* 2009;13(1):73-104.  
43  
44 [47] Huang KY, Liang S, Xu YT, et al. Law of acupoint selection in acupuncture treatment for  
45 insomnia based on data mining method. *Chinese acupuncture and moxibustion.*  
46  
47  
48  
49  
50  
51  
52  
53  
54  
55  
56  
57  
58  
59  
60

1  
2  
3  
4 2015;35(9):960-963.

5 [48] White AR, Filshie J, Cummings TM; International Acupuncture Research Forum. Clinical  
6 trials of acupuncture: consensus recommendations for optimal treatment, sham controls and  
7 blinding. *Complement Ther Med*. 2001; 9(4): 237–245.

8  
9  
10  
11 [49] Zhou W, Benharash P. Significance of "Deqi" response in acupuncture treatment: myth or  
12 reality. *J Acupunct Meridian Stud*. 2014;7(4):186-189.

13  
14 [50] Streitberger K, Kleinhenz J. Introducing a placebo needle into acupuncture research.  
15 *Lancet*. 1998; 352(9125): 364–365.

16  
17 [51] Yeung WF, Chung KF, Tso KC, et al. Electroacupuncture for residual insomnia associated  
18 with major depressive disorder: a randomized controlled trial. *Sleep*. 2011; 34(6):807–815.

19  
20 [52] Kim M, Kim JE, Lee HY, et al. Electroacupuncture for treating insomnia in patients with  
21 cancer: a study protocol for a randomised pilot clinical trial. *BMJ Open*. 2017; 7(8): e016269.  
22 doi: 10.1136/bmjopen-2017-016269.

23  
24 [53] Xie CC, Wen XY, Jiang L, et al. Validity of the "streitberger" needle in a Chinese  
25 population with acupuncture: a randomized, single blinded, and crossover pilot study. *Evid*  
26 *Based Complement Alternat Med*. 2013; 2013: 251603.

27  
28 [54] Kim M, Kim JE, Lee HY, et al. Electroacupuncture for treating insomnia in patients with  
29 cancer: a study protocol for a randomised pilot clinical trial. *Bmj Open*. 2017; 7(8): e016269.

30  
31 [55] Brinkhaus B, Witt CM, Jena S, et al. Interventions and physician characteristics in a  
32 randomized multicenter trial of acupuncture in patients with low-back pain. *J Altern*  
33 *Complement Med*. 2006; 12(7): 649–657.

34  
35 [56] Mollayeva T, Thurairajah P, Burton K, et al. The Pittsburgh Sleep Quality Index as a  
36 screening tool for sleep dysfunction in clinical and nonclinical samples: a systematic review  
37 and meta-analysis. *Sleep Med Rev*. 2016; 25:52–73.

38  
39 [57] Pilz LK, Keller LK, Lenssen D. Time to rethink sleep quality: PSQI scores reflect sleep  
40 quality on workdays. *Sleep*. 2018;41(5). doi: 10.1093/sleep/zsy029.

41  
42 [58] Backhaus J, Junghanns K, Broocks A, et al. Test-retest reliability and validity of the  
43 Pittsburgh Sleep Quality Index in primary insomnia. *J Psychosom Res*. 2002; 53(3): 737–740.

44  
45 [59] Zheng B, Li M, Wang KL, et al. Analysis of the reliability and validity of the Chinese  
46 version of Pittsburgh sleep quality index among medical college students. *Beijing Da Xue Xue*  
47  
48  
49  
50  
51  
52  
53  
54  
55  
56  
57  
58  
59  
60



1  
2  
3  
4 Bao. 2016; 48(3): 424–428.

5 [60] Liu XC, Tang MQ, Hu L, et al. Reliability and validity of the Pittsburgh sleep quality index.

6  
7 Chin J Psychiatry. 1996; 29(2): 103-107.

8  
9 [61] Chen PY, Yang CM, Morin CM. Validating the cross-cultural factor structure and  
10 invariance property of the Insomnia Severity Index: evidence based on ordinal EFA and CFA.  
11 Sleep Med. 2015;16(5):598-603.

12  
13 [62] Morin CM, Belleville G, Bélanger L, et al. The Insomnia Severity Index: psychometric  
14 indicators to detect insomnia cases and evaluate treatment response. Sleep. 2011;34(5):601-608.

15  
16 [63] Yu DS. Insomnia Severity Index: psychometric properties with Chinese community  
17 dwelling older people. J Adv Nurs. 2010; 66(10):2350–2359.

18  
19 [64] Lichstein KL, Stone KC, Donaldson J, et al. Actigraphy validation with insomnia. Sleep.  
20 2006; 29:232-239.

21  
22 [65] Vallières A, Morin CM. Actigraphy in the assessment of insomnia. Sleep. 2003; 26(7):  
23 902–906.

24  
25 [66] Natale V, Plazzi G, Martoni M. Actigraphy in the assessment of insomnia: a quantitative  
26 approach. Sleep. 2009 ;32(6):767-771.

27  
28 [67] Beck AT, Epstein N, Brown G, et al. An inventory for measuring clinical anxiety:  
29 psychometric properties. Consult Clin Psychol. 1988; 56(6): 893-897.

30  
31 [68] Ceng KW, Wong CW, Wong KC, et al. A Study of Psychometric Properties, Normative  
32 Scores and Factor Structure of Beck Anxiety Inventory Chinese Version. Chinese Journal of  
33 Clinical Psychology. 2002;10(1):4-6.

34  
35 [69] Wang Z, Yuan CM, Huang J, et al. Reliability and validity of the Chinese version of Beck  
36 Depression Inventory-II among depression patients. Chinese Mental Health Journal. 2011,  
37 25(6): 476-480.

38  
39 [70] Lichstein KL, Durrence HH, Riedel BW, et al. Epidemiology of Sleep: Age, Gender, and  
40 Ethnicity. New Jersey: Lawrence Erlbaum Associates, Inc.; 2004.

41  
42 [71] Wang MY, Liu IC, Chiu CH, et al. Cultural adaptation and validation of the Chinese  
43 version of the Fatigue Severity Scale in patients with major depressive disorder and  
44 nondepressive people. Qual Life Res. 2016 ;25(1):89-99.

45  
46 [72] Levine J, Schooler NR. SAFTEE: A technique for the systematic assessment of side effects  
47  
48  
49  
50  
51  
52  
53  
54  
55  
56  
57  
58  
59  
60

- 1  
2  
3  
4 in clinical trials. *Psychopharmacol Bull.* 1986; 22(2):343–381.
- 5  
6 [73] Sakpal TV. Sample size estimation in clinical trial. *Perspect Clin Res.* 2010;1(2):67-69.
- 7  
8 [74] Chandan S, Jones MP Bias in the last observation carried forward method under  
9  
10 informative dropout. *J Stat Plan Inference.* 2009;139:246–255.
- 11  
12 [75] Littner M, Hirshkowitz M, Kramer M, et al. Practice parameters for using  
13  
14 polysomnography to evaluate insomnia: an update. *Sleep.* 2003; 26(6): 754–760.
- 15  
16 [76] Fernandez-Mendoza J, Shea S, Vgontzas AN, et al. Insomnia and incident depression: role  
17  
18 of objective sleep duration and natural history. *J Sleep Res.* 2015; 24(4): 390–398.
- 19  
20 [77] Edinger JD, Means MK, Stechuchak KM, et al. A pilot study of inexpensive sleep  
21  
22 assessment devices. *Behav Sleep Med.* 2004; 2(1): 41–49.
- 23  
24 [78] Friedman L, Benson K, Noda A, et al. An actigraphic comparison of sleep restriction and  
25  
26 sleep hygiene treatments for insomnia in older adults. *J Geriatr Psychiatry Neurol.* 2000; 13(1):  
27  
28 17–27.
- 29  
30 [79] Ancoli-Israel S, Cole R, Alessi C, et al. The role of actigraphy in the study of sleep and  
31  
32 circadian rhythms. *Sleep.* 2003; 26(3): 342–392.
- 33  
34 [80] Sánchez-Ortuño MM, Edinger JD, Means MK, et al. Home is where sleep is: an ecological  
35  
36 approach to test the validity of actigraphy for the assessment of insomnia. *J Clin Sleep Med.*  
37  
38 2010; 6(1):21–29.
- 39  
40 [81] Walach, Harald. The Efficacy Paradox in Randomized Controlled Trials of CAM and  
41  
42 Elsewhere: Beware of the Placebo Trap. *The Journal of Alternative and Complementary*  
43  
44 *Medicine.* 2001; 7(3):213-218.
- 45  
46 [82] Paterson, C. Characteristic and incidental (placebo) effects in complex interventions such  
47  
48 as acupuncture. *BMJ.* 2005; 330(7501):1202-1205.
- 49  
50 [83] Verhoef MJ, Lewith G, Ritenbaugh C, et al. Complementary and alternative medicine  
51  
52 whole systems research: Beyond identification of inadequacies of the RCT. *Complementary*  
53  
54 *Therapies in Medicine.* 2005; 13(3):206-212.
- 55  
56 [84] Zheng YC, Yuan TT, Liu T. Is acupuncture a placebo therapy?. *Complementary Therapies*  
57  
58 *in Medicine.* 2014; 22(4):724-730.
- 59  
60

### **Fig.1. Trial flow chart**

1  
2  
3  
4  
5  
6  
7  
8  
9  
10  
11  
12  
13  
14  
15  
16  
17  
18  
19  
20  
21  
22  
23  
24  
25  
26  
27  
28  
29  
30  
31  
32  
33  
34  
35  
36  
37  
38  
39  
40  
41  
42  
43  
44  
45  
46  
47  
48  
49  
50  
51  
52  
53  
54  
55  
56  
57  
58  
59  
60

HCG: Human chorionic gonadotropin

PSG: Polysomnography

For peer review only



Fig.1. Trial flow chart

# Reporting checklist for protocol of a clinical trial.

Based on the SPIRIT guidelines.

## Instructions to authors

Complete this checklist by entering the page numbers from your manuscript where readers will find each of the items listed below.

Your article may not currently address all the items on the checklist. Please modify your text to include the missing information. If you are certain that an item does not apply, please write "n/a" and provide a short explanation.

Upload your completed checklist as an extra file when you submit to a journal.

In your methods section, say that you used the SPIRIT reporting guidelines, and cite them as:

Chan A-W, Tetzlaff JM, Altman DG, Laupacis A, Gøtzsche PC, Krleža-Jerić K, Hróbjartsson A, Mann H, Dickersin K, Berlin J, Doré C, Parulekar W, Summerskill W, Groves T, Schulz K, Sox H, Rockhold FW, Rennie D, Moher D. SPIRIT 2013 Statement: Defining standard protocol items for clinical trials. *Ann Intern Med.* 2013;158(3):200-207

|                                             |                     | Reporting Item                                                                                               | Page Number |
|---------------------------------------------|---------------------|--------------------------------------------------------------------------------------------------------------|-------------|
| <b>Administrative information</b>           |                     |                                                                                                              |             |
| Title                                       | <a href="#">#1</a>  | Descriptive title identifying the study design, population, interventions, and, if applicable, trial acronym | 1           |
| Trial registration                          | <a href="#">#2a</a> | Trial identifier and registry name. If not yet registered, name of intended registry                         | 1           |
| Trial registration: data set                | <a href="#">#2b</a> | All items from the World Health Organization Trial Registration Data Set                                     | 1           |
| Protocol version                            | <a href="#">#3</a>  | Date and version identifier                                                                                  | n/a         |
| Funding                                     | <a href="#">#4</a>  | Sources and types of financial, material, and other support                                                  | 18          |
| Roles and responsibilities: contributorship | <a href="#">#5a</a> | Names, affiliations, and roles of protocol contributors                                                      | 18          |

|    |                           |                     |                                                                      |     |
|----|---------------------------|---------------------|----------------------------------------------------------------------|-----|
| 1  | Roles and                 | <a href="#">#5b</a> | Name and contact information for the trial sponsor                   | n/a |
| 2  | responsibilities:         |                     |                                                                      |     |
| 3  | sponsor contact           |                     |                                                                      |     |
| 4  | information               |                     |                                                                      |     |
| 5  |                           |                     |                                                                      |     |
| 6  |                           |                     |                                                                      |     |
| 7  |                           |                     |                                                                      |     |
| 8  | Roles and                 | <a href="#">#5c</a> | Role of study sponsor and funders, if any, in study design;          | n/a |
| 9  | responsibilities:         |                     | collection, management, analysis, and interpretation of data;        |     |
| 10 | sponsor and funder        |                     | writing of the report; and the decision to submit the report for     |     |
| 11 |                           |                     | publication, including whether they will have ultimate authority     |     |
| 12 |                           |                     | over any of these activities                                         |     |
| 13 |                           |                     |                                                                      |     |
| 14 |                           |                     |                                                                      |     |
| 15 |                           |                     |                                                                      |     |
| 16 | Roles and                 | <a href="#">#5d</a> | Composition, roles, and responsibilities of the coordinating centre, | n/a |
| 17 | responsibilities:         |                     | steering committee, endpoint adjudication committee, data            |     |
| 18 | committees                |                     | management team, and other individuals or groups overseeing the      |     |
| 19 |                           |                     | trial, if applicable (see Item 21a for data monitoring committee)    |     |
| 20 |                           |                     |                                                                      |     |
| 21 |                           |                     |                                                                      |     |
| 22 |                           |                     |                                                                      |     |
| 23 | <b>Introduction</b>       |                     |                                                                      |     |
| 24 |                           |                     |                                                                      |     |
| 25 | Background and            | <a href="#">#6a</a> | Description of research question and justification for undertaking   | 3   |
| 26 | rationale                 |                     | the trial, including summary of relevant studies (published and      |     |
| 27 |                           |                     | unpublished) examining benefits and harms for each intervention      |     |
| 28 |                           |                     |                                                                      |     |
| 29 |                           |                     |                                                                      |     |
| 30 | Background and            | <a href="#">#6b</a> | Explanation for choice of comparators                                | 3   |
| 31 | rationale: choice of      |                     |                                                                      |     |
| 32 | comparators               |                     |                                                                      |     |
| 33 |                           |                     |                                                                      |     |
| 34 |                           |                     |                                                                      |     |
| 35 |                           |                     |                                                                      |     |
| 36 | Objectives                | <a href="#">#7</a>  | Specific objectives or hypotheses                                    | 4   |
| 37 |                           |                     |                                                                      |     |
| 38 | Trial design              | <a href="#">#8</a>  | Description of trial design including type of trial (eg, parallel    | 4   |
| 39 |                           |                     | group, crossover, factorial, single group), allocation ratio, and    |     |
| 40 |                           |                     | framework (eg, superiority, equivalence, non-inferiority,            |     |
| 41 |                           |                     | exploratory)                                                         |     |
| 42 |                           |                     |                                                                      |     |
| 43 |                           |                     |                                                                      |     |
| 44 |                           |                     |                                                                      |     |
| 45 | <b>Methods:</b>           |                     |                                                                      |     |
| 46 | <b>Participants,</b>      |                     |                                                                      |     |
| 47 | <b>interventions, and</b> |                     |                                                                      |     |
| 48 | <b>outcomes</b>           |                     |                                                                      |     |
| 49 |                           |                     |                                                                      |     |
| 50 |                           |                     |                                                                      |     |
| 51 | Study setting             | <a href="#">#9</a>  | Description of study settings (eg, community clinic, academic        | 4   |
| 52 |                           |                     | hospital) and list of countries where data will be collected.        |     |
| 53 |                           |                     | Reference to where list of study sites can be obtained               |     |
| 54 |                           |                     |                                                                      |     |
| 55 |                           |                     |                                                                      |     |
| 56 |                           |                     |                                                                      |     |
| 57 | Eligibility criteria      | <a href="#">#10</a> | Inclusion and exclusion criteria for participants. If applicable,    | 7   |
| 58 |                           |                     | eligibility criteria for study centres and individuals who will      |     |
| 59 |                           |                     |                                                                      |     |
| 60 |                           |                     |                                                                      |     |

|    |                              |                                                                                            |     |
|----|------------------------------|--------------------------------------------------------------------------------------------|-----|
|    |                              | perform the interventions (eg, surgeons, psychotherapists)                                 |     |
| 1  |                              |                                                                                            |     |
| 2  | Interventions:               | <a href="#">#11a</a> Interventions for each group with sufficient detail to allow          | 8   |
| 3  | description                  | replication, including how and when they will be administered                              |     |
| 4  |                              |                                                                                            |     |
| 5  | Interventions:               | <a href="#">#11b</a> Criteria for discontinuing or modifying allocated interventions for a | n/a |
| 6  | modifications                | given trial participant (eg, drug dose change in response to harms,                        |     |
| 7  |                              | participant request, or improving / worsening disease)                                     |     |
| 8  |                              |                                                                                            |     |
| 9  | Interventions:               | <a href="#">#11c</a> Strategies to improve adherence to intervention protocols, and any    | n/a |
| 10 | adherence                    | procedures for monitoring adherence (eg, drug tablet return;                               |     |
| 11 |                              | laboratory tests)                                                                          |     |
| 12 | Interventions:               | <a href="#">#11d</a> Relevant concomitant care and interventions that are permitted or     | n/a |
| 13 | concomitant care             | prohibited during the trial                                                                |     |
| 14 |                              |                                                                                            |     |
| 15 | Outcomes                     | <a href="#">#12</a> Primary, secondary, and other outcomes, including the specific         | n/a |
| 16 |                              | measurement variable (eg, systolic blood pressure), analysis metric                        |     |
| 17 |                              | (eg, change from baseline, final value, time to event), method of                          |     |
| 18 |                              | aggregation (eg, median, proportion), and time point for each                              |     |
| 19 |                              | outcome. Explanation of the clinical relevance of chosen efficacy                          |     |
| 20 |                              | and harm outcomes is strongly recommended                                                  |     |
| 21 | Participant timeline         | <a href="#">#13</a> Time schedule of enrolment, interventions (including any run-ins       | 6   |
| 22 |                              | and washouts), assessments, and visits for participants. A                                 |     |
| 23 |                              | schematic diagram is highly recommended (see Figure)                                       |     |
| 24 |                              |                                                                                            |     |
| 25 | Sample size                  | <a href="#">#14</a> Estimated number of participants needed to achieve study               | 13  |
| 26 |                              | objectives and how it was determined, including clinical and                               |     |
| 27 |                              | statistical assumptions supporting any sample size calculations                            |     |
| 28 |                              |                                                                                            |     |
| 29 | Recruitment                  | <a href="#">#15</a> Strategies for achieving adequate participant enrolment to reach       | 7   |
| 30 |                              | target sample size                                                                         |     |
| 31 |                              |                                                                                            |     |
| 32 |                              |                                                                                            |     |
| 33 |                              |                                                                                            |     |
| 34 |                              |                                                                                            |     |
| 35 |                              |                                                                                            |     |
| 36 |                              |                                                                                            |     |
| 37 |                              |                                                                                            |     |
| 38 |                              |                                                                                            |     |
| 39 |                              |                                                                                            |     |
| 40 |                              |                                                                                            |     |
| 41 |                              |                                                                                            |     |
| 42 |                              |                                                                                            |     |
| 43 |                              |                                                                                            |     |
| 44 |                              |                                                                                            |     |
| 45 | <b>Methods: Assignment</b>   |                                                                                            |     |
| 46 | <b>of interventions (for</b> |                                                                                            |     |
| 47 | <b>controlled trials)</b>    |                                                                                            |     |
| 48 |                              |                                                                                            |     |
| 49 |                              |                                                                                            |     |
| 50 | Allocation: sequence         | <a href="#">#16a</a> Method of generating the allocation sequence (eg, computer-           | 14  |
| 51 | generation                   | generated random numbers), and list of any factors for                                     |     |
| 52 |                              | stratification. To reduce predictability of a random sequence,                             |     |
| 53 |                              | details of any planned restriction (eg, blocking) should be provided                       |     |
| 54 |                              | in a separate document that is unavailable to those who enrol                              |     |
| 55 |                              | participants or assign interventions                                                       |     |
| 56 |                              |                                                                                            |     |
| 57 |                              |                                                                                            |     |
| 58 |                              |                                                                                            |     |
| 59 |                              |                                                                                            |     |
| 60 |                              |                                                                                            |     |

|    |                        |                      |                                                                       |     |
|----|------------------------|----------------------|-----------------------------------------------------------------------|-----|
| 1  | Allocation concealment | <a href="#">#16b</a> | Mechanism of implementing the allocation sequence (eg, central        | 14  |
| 2  | mechanism              |                      | telephone; sequentially numbered, opaque, sealed envelopes),          |     |
| 3  |                        |                      | describing any steps to conceal the sequence until interventions are  |     |
| 4  |                        |                      | assigned                                                              |     |
| 5  |                        |                      |                                                                       |     |
| 6  |                        |                      |                                                                       |     |
| 7  |                        |                      |                                                                       |     |
| 8  | Allocation:            | <a href="#">#16c</a> | Who will generate the allocation sequence, who will enrol             | 14  |
| 9  | implementation         |                      | participants, and who will assign participants to interventions       |     |
| 10 |                        |                      |                                                                       |     |
| 11 | Blinding (masking)     | <a href="#">#17a</a> | Who will be blinded after assignment to interventions (eg, trial      | 14  |
| 12 |                        |                      | participants, care providers, outcome assessors, data analysts), and  |     |
| 13 |                        |                      | how                                                                   |     |
| 14 |                        |                      |                                                                       |     |
| 15 |                        |                      |                                                                       |     |
| 16 |                        |                      |                                                                       |     |
| 17 | Blinding (masking):    | <a href="#">#17b</a> | If blinded, circumstances under which unblinding is permissible,      | 14  |
| 18 | emergency unblinding   |                      | and procedure for revealing a participant's allocated intervention    |     |
| 19 |                        |                      | during the trial                                                      |     |
| 20 |                        |                      |                                                                       |     |
| 21 |                        |                      |                                                                       |     |
| 22 | <b>Methods: Data</b>   |                      |                                                                       |     |
| 23 | <b>collection,</b>     |                      |                                                                       |     |
| 24 | <b>management, and</b> |                      |                                                                       |     |
| 25 | <b>analysis</b>        |                      |                                                                       |     |
| 26 |                        |                      |                                                                       |     |
| 27 |                        |                      |                                                                       |     |
| 28 |                        |                      |                                                                       |     |
| 29 | Data collection plan   | <a href="#">#18a</a> | Plans for assessment and collection of outcome, baseline, and other   | 15  |
| 30 |                        |                      | trial data, including any related processes to promote data quality   |     |
| 31 |                        |                      | (eg, duplicate measurements, training of assessors) and a             |     |
| 32 |                        |                      | description of study instruments (eg, questionnaires, laboratory      |     |
| 33 |                        |                      | tests) along with their reliability and validity, if known. Reference |     |
| 34 |                        |                      | to where data collection forms can be found, if not in the protocol   |     |
| 35 |                        |                      |                                                                       |     |
| 36 |                        |                      |                                                                       |     |
| 37 |                        |                      |                                                                       |     |
| 38 |                        |                      |                                                                       |     |
| 39 | Data collection plan:  | <a href="#">#18b</a> | Plans to promote participant retention and complete follow-up,        | 15  |
| 40 | retention              |                      | including list of any outcome data to be collected for participants   |     |
| 41 |                        |                      | who discontinue or deviate from intervention protocols                |     |
| 42 |                        |                      |                                                                       |     |
| 43 |                        |                      |                                                                       |     |
| 44 | Data management        | <a href="#">#19</a>  | Plans for data entry, coding, security, and storage, including any    | 15  |
| 45 |                        |                      | related processes to promote data quality (eg, double data entry;     |     |
| 46 |                        |                      | range checks for data values). Reference to where details of data     |     |
| 47 |                        |                      | management procedures can be found, if not in the protocol            |     |
| 48 |                        |                      |                                                                       |     |
| 49 |                        |                      |                                                                       |     |
| 50 |                        |                      |                                                                       |     |
| 51 | Statistics: outcomes   | <a href="#">#20a</a> | Statistical methods for analysing primary and secondary outcomes.     | 15  |
| 52 |                        |                      | Reference to where other details of the statistical analysis plan can |     |
| 53 |                        |                      | be found, if not in the protocol                                      |     |
| 54 |                        |                      |                                                                       |     |
| 55 |                        |                      |                                                                       |     |
| 56 | Statistics: additional | <a href="#">#20b</a> | Methods for any additional analyses (eg, subgroup and adjusted        | n/a |
| 57 | analyses               |                      | analyses)                                                             |     |
| 58 |                        |                      |                                                                       |     |
| 59 |                        |                      |                                                                       |     |
| 60 |                        |                      |                                                                       |     |



|    |                            |                      |                                                                         |     |
|----|----------------------------|----------------------|-------------------------------------------------------------------------|-----|
| 1  | Statistics: analysis       | <a href="#">#20c</a> | Definition of analysis population relating to protocol non-             | n/a |
| 2  | population and missing     |                      | adherence (eg, as randomised analysis), and any statistical methods     |     |
| 3  | data                       |                      | to handle missing data (eg, multiple imputation)                        |     |
| 4  |                            |                      |                                                                         |     |
| 5  |                            |                      |                                                                         |     |
| 6  | <b>Methods: Monitoring</b> |                      |                                                                         |     |
| 7  |                            |                      |                                                                         |     |
| 8  | Data monitoring:           | <a href="#">#21a</a> | Composition of data monitoring committee (DMC); summary of its          | n/a |
| 9  | formal committee           |                      | role and reporting structure; statement of whether it is independent    |     |
| 10 |                            |                      | from the sponsor and competing interests; and reference to where        |     |
| 11 |                            |                      | further details about its charter can be found, if not in the protocol. |     |
| 12 |                            |                      | Alternatively, an explanation of why a DMC is not needed                |     |
| 13 |                            |                      |                                                                         |     |
| 14 |                            |                      |                                                                         |     |
| 15 |                            |                      |                                                                         |     |
| 16 |                            |                      |                                                                         |     |
| 17 | Data monitoring:           | <a href="#">#21b</a> | Description of any interim analyses and stopping guidelines,            | n/a |
| 18 | interim analysis           |                      | including who will have access to these interim results and make        |     |
| 19 |                            |                      | the final decision to terminate the trial                               |     |
| 20 |                            |                      |                                                                         |     |
| 21 |                            |                      |                                                                         |     |
| 22 | Harms                      | <a href="#">#22</a>  | Plans for collecting, assessing, reporting, and managing solicited      | 11  |
| 23 |                            |                      | and spontaneously reported adverse events and other unintended          |     |
| 24 |                            |                      | effects of trial interventions or trial conduct                         |     |
| 25 |                            |                      |                                                                         |     |
| 26 |                            |                      |                                                                         |     |
| 27 | Auditing                   | <a href="#">#23</a>  | Frequency and procedures for auditing trial conduct, if any, and        | n/a |
| 28 |                            |                      | whether the process will be independent from investigators and the      |     |
| 29 |                            |                      | sponsor                                                                 |     |
| 30 |                            |                      |                                                                         |     |
| 31 |                            |                      |                                                                         |     |
| 32 |                            |                      |                                                                         |     |
| 33 | <b>Ethics and</b>          |                      |                                                                         |     |
| 34 | <b>dissemination</b>       |                      |                                                                         |     |
| 35 |                            |                      |                                                                         |     |
| 36 |                            |                      |                                                                         |     |
| 37 | Research ethics            | <a href="#">#24</a>  | Plans for seeking research ethics committee / institutional review      | 19  |
| 38 | approval                   |                      | board (REC / IRB) approval                                              |     |
| 39 |                            |                      |                                                                         |     |
| 40 |                            |                      |                                                                         |     |
| 41 | Protocol amendments        | <a href="#">#25</a>  | Plans for communicating important protocol modifications (eg,           | n/a |
| 42 |                            |                      | changes to eligibility criteria, outcomes, analyses) to relevant        |     |
| 43 |                            |                      | parties (eg, investigators, REC / IRBs, trial participants, trial       |     |
| 44 |                            |                      | registries, journals, regulators)                                       |     |
| 45 |                            |                      |                                                                         |     |
| 46 |                            |                      |                                                                         |     |
| 47 | Consent or assent          | <a href="#">#26a</a> | Who will obtain informed consent or assent from potential trial         | n/a |
| 48 |                            |                      | participants or authorised surrogates, and how (see Item 32)            |     |
| 49 |                            |                      |                                                                         |     |
| 50 |                            |                      |                                                                         |     |
| 51 | Consent or assent:         | <a href="#">#26b</a> | Additional consent provisions for collection and use of participant     | n/a |
| 52 | ancillary studies          |                      | data and biological specimens in ancillary studies, if applicable       |     |
| 53 |                            |                      |                                                                         |     |
| 54 |                            |                      |                                                                         |     |
| 55 | Confidentiality            | <a href="#">#27</a>  | How personal information about potential and enrolled participants      | 14  |
| 56 |                            |                      | will be collected, shared, and maintained in order to protect           |     |
| 57 |                            |                      | confidentiality before, during, and after the trial                     |     |
| 58 |                            |                      |                                                                         |     |
| 59 |                            |                      |                                                                         |     |
| 60 |                            |                      |                                                                         |     |

|    |                                             |                      |                                                                                                                                                                                                                                                                                     |     |
|----|---------------------------------------------|----------------------|-------------------------------------------------------------------------------------------------------------------------------------------------------------------------------------------------------------------------------------------------------------------------------------|-----|
| 1  | Declaration of interests                    | <a href="#">#28</a>  | Financial and other competing interests for principal investigators for the overall trial and each study site                                                                                                                                                                       | 18  |
| 2  |                                             |                      |                                                                                                                                                                                                                                                                                     |     |
| 3  |                                             |                      |                                                                                                                                                                                                                                                                                     |     |
| 4  |                                             |                      |                                                                                                                                                                                                                                                                                     |     |
| 5  | Data access                                 | <a href="#">#29</a>  | Statement of who will have access to the final trial dataset, and disclosure of contractual agreements that limit such access for investigators                                                                                                                                     | n/a |
| 6  |                                             |                      |                                                                                                                                                                                                                                                                                     |     |
| 7  |                                             |                      |                                                                                                                                                                                                                                                                                     |     |
| 8  |                                             |                      |                                                                                                                                                                                                                                                                                     |     |
| 9  |                                             |                      |                                                                                                                                                                                                                                                                                     |     |
| 10 | Ancillary and post trial care               | <a href="#">#30</a>  | Provisions, if any, for ancillary and post-trial care, and for compensation to those who suffer harm from trial participation                                                                                                                                                       | n/a |
| 11 |                                             |                      |                                                                                                                                                                                                                                                                                     |     |
| 12 |                                             |                      |                                                                                                                                                                                                                                                                                     |     |
| 13 |                                             |                      |                                                                                                                                                                                                                                                                                     |     |
| 14 | Dissemination policy: trial results         | <a href="#">#31a</a> | Plans for investigators and sponsor to communicate trial results to participants, healthcare professionals, the public, and other relevant groups (eg, via publication, reporting in results databases, or other data sharing arrangements), including any publication restrictions | n/a |
| 15 |                                             |                      |                                                                                                                                                                                                                                                                                     |     |
| 16 |                                             |                      |                                                                                                                                                                                                                                                                                     |     |
| 17 |                                             |                      |                                                                                                                                                                                                                                                                                     |     |
| 18 |                                             |                      |                                                                                                                                                                                                                                                                                     |     |
| 19 |                                             |                      |                                                                                                                                                                                                                                                                                     |     |
| 20 |                                             |                      |                                                                                                                                                                                                                                                                                     |     |
| 21 | Dissemination policy: authorship            | <a href="#">#31b</a> | Authorship eligibility guidelines and any intended use of professional writers                                                                                                                                                                                                      | n/a |
| 22 |                                             |                      |                                                                                                                                                                                                                                                                                     |     |
| 23 |                                             |                      |                                                                                                                                                                                                                                                                                     |     |
| 24 | Dissemination policy: reproducible research | <a href="#">#31c</a> | Plans, if any, for granting public access to the full protocol, participant-level dataset, and statistical code                                                                                                                                                                     | n/a |
| 25 |                                             |                      |                                                                                                                                                                                                                                                                                     |     |
| 26 |                                             |                      |                                                                                                                                                                                                                                                                                     |     |
| 27 |                                             |                      |                                                                                                                                                                                                                                                                                     |     |
| 28 | <b>Appendices</b>                           |                      |                                                                                                                                                                                                                                                                                     |     |
| 29 |                                             |                      |                                                                                                                                                                                                                                                                                     |     |
| 30 |                                             |                      |                                                                                                                                                                                                                                                                                     |     |
| 31 | Informed consent materials                  | <a href="#">#32</a>  | Model consent form and other related documentation given to participants and authorised surrogates                                                                                                                                                                                  | n/a |
| 32 |                                             |                      |                                                                                                                                                                                                                                                                                     |     |
| 33 |                                             |                      |                                                                                                                                                                                                                                                                                     |     |
| 34 |                                             |                      |                                                                                                                                                                                                                                                                                     |     |
| 35 | Biological specimens                        | <a href="#">#33</a>  | Plans for collection, laboratory evaluation, and storage of biological specimens for genetic or molecular analysis in the current trial and for future use in ancillary studies, if applicable                                                                                      | n/a |
| 36 |                                             |                      |                                                                                                                                                                                                                                                                                     |     |
| 37 |                                             |                      |                                                                                                                                                                                                                                                                                     |     |
| 38 |                                             |                      |                                                                                                                                                                                                                                                                                     |     |
| 39 |                                             |                      |                                                                                                                                                                                                                                                                                     |     |

40 The SPIRIT checklist is distributed under the terms of the Creative Commons Attribution License CC-BY-ND  
 41 3.0. This checklist was completed on 19. August 2019 using <https://www.goodreports.org/>, a tool made by the  
 42 [EQUATOR Network](#) in collaboration with [Penelope.ai](#)  
 43  
 44  
 45  
 46  
 47  
 48  
 49  
 50  
 51  
 52  
 53  
 54  
 55  
 56  
 57  
 58  
 59
